# Supplementary material
Source: PubMed Central journal article supplement (PMC5549446)
Supplement: NIHMS884609-supplement-Supplemental_Information.pdf [file NIHMS884609-supplement-Supplemental_Information.pdf]

# Mechanism of NHC-Catalyzed Conjugate Additions of Diboron and Borosilane Reagents to $\alpha,\beta$ -Unsaturated Carbonyl Compounds

Hao Wu, Jeannette M. Garcia, Fredrik Haeffner, Suttipol Radomkit, Adil R. Zhugralin  
and Amir H. Hoveyda\*

*Department of Chemistry, Merkert Chemistry Center, Boston College, Chestnut Hill, Massachusetts 02467*

## SUPPORTING INFORMATION

### *Table of Contents*

|                                                                                                                     |           |
|---------------------------------------------------------------------------------------------------------------------|-----------|
| General.....                                                                                                        | S2        |
| Reagents.....                                                                                                       | S2–S3     |
| Preparations and Analytical Data of Compounds ( <b>10–17</b> in Scheme 5).....                                      | S3–S6     |
| Analytical Data of $^{13}\text{C}$ -Labeled Imidazolium Salt <b>7c</b> .....                                        | S6–S7     |
| Analytical Data of Compound <b>43</b> .....                                                                         | S7        |
| Analytical Data of $\beta$ -Silyl Carbonyl <b>33c</b> .....                                                         | S7–S8     |
| NMR Studies on Probing the Formation of Chiral NHC•diboron Complex.....                                             | S8–S9     |
| NMR Studies on Probing the Formation of Chiral NHC•borosilane Complex.....                                          | S9–S17    |
| Kinetic Studies of Chiral NHC Catalyzed BCA and SCA Reactions.....                                                  | S17–S22   |
| Calculations on BDE for B–B Bonds in $\text{B}_2(\text{pin})_2$ and $\text{NHC}\cdot\text{B}_2(\text{pin})_2$ ..... | S22–S26   |
| Calculations on Stereochemical Models for BCA and SCA Reactions.....                                                | S27–S71   |
| Computational analysis of a Doubly Coordinated Diboron Complex.....                                                 | S71–S76   |
| X-ray Structures of Compound <b>15</b> , <b>34</b> and <b>43</b> .....                                              | S76–S131  |
| $^1\text{H}$ NMR Spectra.....                                                                                       | S132–S141 |
| References.....                                                                                                     | S142      |

**General.** Infrared (IR) spectra were recorded on a Bruker FT-IR Alpha (ATR mode) spectrophotometer,  $\nu_{\max}$  in  $\text{cm}^{-1}$ . Bands are characterized as broad (br), strong (s), medium (m), and weak (w).  $^1\text{H}$  NMR spectra were recorded on a Varian Unity INOVA 400 (400 MHz), 500 (500 MHz) or 600 (600 MHz) spectrometer. Chemical shifts are reported in ppm from tetramethylsilane with the solvent resonance as the internal standard ( $\text{CDCl}_3$ :  $\delta$  7.26 ppm).  $^{13}\text{C}$  NMR spectra were recorded on a Varian Unity INOVA 400 (100 MHz) spectrometer with complete proton decoupling. Chemical shifts are reported in ppm from tetramethylsilane with the solvent resonance as the internal standard ( $\text{CDCl}_3$ :  $\delta$  77.16 ppm).  $^{11}\text{B}$  NMR were recorded on a Varian Unity INOVA 500 (128 MHz) with  $\text{BF}_3 \cdot (\text{OEt})_2$  resonance as the external reference (thf- $d_8$ :  $\delta$  0.0 ppm).  $^{19}\text{F}$  NMR were recorded on a Varian Unity INOVA 400 (376 MHz) with  $\text{CF}_3\text{COOH}$  resonance as the external reference (thf- $d_8$ :  $\delta$  -76.55 ppm). Data are reported as follows: chemical shift, integration, multiplicity (s = singlet, d = doublet, t = triplet, q = quartet, m = multiplet, br s = broad singlet), and coupling constants (Hz). High-resolution mass spectrometry was performed on a JEOL AccuTOF-DART (positive mode) or ESI-MS (positive mode) at the Mass Spectrometry Facility, Boston College. Enantiomeric ratios were determined by HPLC analysis (high-performance liquid chromatography) with a Shimadzu chromatograph (Chiral Technologies Chiralpak AD-H (4.6 x 250 mm)) in comparison with authentic racemic materials. Specific rotations were measured on a Rudolph Research Analytical Autopol IV Polarimeter. X-ray structures for compound **15**, **34** and **43** were obtained, as described in the cif files, with a Microfocus sealed Cu tube from Incote. It is well established that the aforementioned detector allows for the determination of absolute configuration of molecules that do not have a heavy atom. The absolute configuration was verified by the flack parameter of 0.0 with a standard deviation of 2 and corroborated by Bijvoet parameter test. The melting point of compound **16** was determined using a Thomas Hoover Uni-melt capillary melting point apparatus.

Unless otherwise noted, reactions were carried out with distilled and degassed solvents under an atmosphere of dry  $\text{N}_2$  in oven- (135 °C) or flame-dried glassware with standard dry box or vacuum-line techniques. Solvents were purified under a positive pressure of dry Ar by a modified Innovative Technologies purification system: toluene was purified through a copper oxide and alumina column;  $\text{CH}_2\text{Cl}_2$  and  $\text{Et}_2\text{O}$  were purged with Ar and purified by passage through two alumina columns. Tetrahydrofuran (Aldrich) was purified by distillation from sodium benzophenone ketyl prior to use. Methanol and *i*-propanol were distilled over sodium.  $\text{CDCl}_3$  and  $d_8$ -thf were purchased from Cambridge Isotope Laboratories and used as received. All work-up and purification procedures were carried out with reagent grade solvents (purchased from Fisher Scientific) under air.

■ **Reagents:**

**1,3-Bis(2,4,6-trimethylphenyl)imidazolium chloride** was purchased from Aldrich and used as received.

**Bis(pinacolato)diboron** [ $\text{B}_2(\text{pin})_2$ ] was purchased from Frontier Scientific. It was purified by

recrystallization from hot anhydrous pentane and subsequently dried under high vacuum at 50 °C for 18 h.

**Chlorodimethylphenylsilane** (PhMe<sub>2</sub>SiCl) was purchased from Aldrich and used as received.

**Copper (I) cyanide** was purchased from Aldrich and used as received.

**2-Cyclohexen-1-one** was purchased from Aldrich and distilled *in vacuo* prior to use.

**3-Cyclopropyl-2-cyclohexen-1-one (9)** was prepared following a procedure disclosed previously.<sup>1</sup>

**1,8-Diazabicyclo[5.4.0]undec-7-ene** (dbu) was purchased from Aldrich and distilled *in vacuo* prior to use.

**1,3-Dicyclohexylimidazolium tetrafluoroborate** was purchased from Aldrich or TCI America and purified by silica gel chromatography followed by trituration from CH<sub>2</sub>Cl<sub>2</sub>/hexanes prior to use.

**Dimethylphenylsilylpinacolatoborane** [PhMe<sub>2</sub>Si-B(pin)] was purchased from Aldrich and distilled *in vacuo* prior to use.

**Lithium bromide** was purchased from Strem and used as received.

**Potassium bis(trimethylsilyl)amide** (KHMDs) was purchased from Aldrich and used as received.

**Sodium *tert*-butoxide (NaOt-Bu)** was purchased from Strem and used as received.

**Trimethyl borate** was purchased from Aldrich and used as received.

**Zinc chloride** (anhydrous) was purchased from Strem and used as received.

Unless otherwise noted, all the other  $\alpha,\beta$ -unsaturated carbonyls, imidazolium salts and the corresponding  $\beta$ -boryl (or silyl) carbonyls were reported previously.<sup>2</sup>

## ■ Preparations and Analytical Data for Compounds (10–17 in Scheme 5)

### I. Preparations and analytical data for $\alpha,\beta$ -unsaturated carbonyls

**2-Cyclopropyl-2-cyclohexen-1-one (substrate for 12)** was prepared based on modification of a reported procedure.<sup>3</sup> Under dry N<sub>2</sub> atmosphere in a flame-dried round-bottom flask, anhydrous ZnCl<sub>2</sub> (1.2 g, 8.8 mmol, 1.1 equiv) and 16 mL of 0.58 mol/L cyclopropyl magnesium bromide solution in thf (9.3 mmol, 1.2 equiv) were mixed. The resulting milky-white mixture was allowed to stir at 22 °C for 30 min, at which time a solution of 2-iodo-2-cyclohexen-1-one (1.7 g, 7.8 mmol, 1.0 equiv) and Pd(PPh<sub>3</sub>)<sub>2</sub>Cl<sub>2</sub> (242 mg, 0.34 mmol, 0.044 equiv) in dmf (20 mL) was added drop-wise. The mixture was allowed to stir at 22 °C for 12 h, at which time aqueous 10% (wt.) citric acid was added drop-wise to quench the excess organometallic reagent. The mixture was diluted with Et<sub>2</sub>O, layers were separated, and the aqueous layer was washed with Et<sub>2</sub>O twice. Combined organic layers were dried over anhydrous MgSO<sub>4</sub>, filtered and concentrated *in vacuo* to give brown oil. Purification by silica gel chromatography (5:1 hexanes:Et<sub>2</sub>O), followed by distillation (200 °C, high vacuum) gave 2-cyclopropyl-2-cyclohexen-1-one as a colorless oil (661 mg, 4.8 mmol, 62% yield). <sup>1</sup>H NMR (CDCl<sub>3</sub>, 400 MHz):  $\delta$  6.42 (1H, dd, *J* = 4.3, 4.3 Hz), 2.45–

2.42 (2H, m), 2.33–2.29 (2H, m), 1.98–1.91 (2H, m), 1.78–1.71 (1H, m), 0.75–0.70 (2H, m), 0.38–0.34 (2H, m). The spectroscopic data match those reported previously.<sup>4</sup>

**3-(2,2-Diphenylcyclopropyl)-2-cyclohexen-1-one (substrate for 13)** was prepared following a modified procedure.<sup>5</sup> Under a dry N<sub>2</sub> atmosphere at –20 °C, a solution of 2,2-diphenylcyclopropyl magnesium bromide (0.19 mol/L in thf, 25 mL, 4.8 mmol, 0.98 equiv) was added drop-wise to the solution of CuCN (536 mg, 6.0 mmol, 1.2 equiv) and LiBr (1.0 g, 12 mmol, 2.4 equiv) in thf (5 mL). The resulting creamy yellow mixture was allowed to stir at 0 °C for 5 min. Then it was allowed to cool to –78 °C with vigorous stirring, to which a solution of 3-iodo-2-cyclohexen-1-one (1.1 g, 4.9 mmol, 1.0 equiv) in thf (5 mL) was added drop-wise. The mixture was allowed to stir at –50 °C for 12 h, before excess organometallic reagent was quenched by addition of water. The mixture was diluted with water (50 mL) and saturated aqueous NH<sub>4</sub>Cl until pH = 7, followed by addition of Et<sub>2</sub>O. The layers were then separated, and the aqueous layer was washed with Et<sub>2</sub>O twice. The combined organic layers were dried over anhydrous MgSO<sub>4</sub>, filtered, and concentrated *in vacuo* to give light yellow oil. Purification by silica gel chromatography (2:1 hexanes:Et<sub>2</sub>O) gave 3-(2,2-diphenylcyclopropyl)-2-cyclohexen-1-one as a viscous colorless oil (1.0 g, 3.6 mmol, 74% yield). IR (neat): 3056 (w), 3023 (w), 2945 (w), 2867 (w), 1660 (s), 1621 (m), 1600 (m), 1494 (m), 1446 (m), 1426 (w), 1396 (w), 1378 (w), 1346 (m), 1324 (m), 1295 (w), 1191 (w), 1179 (w), 1127 (w), 1078 (w), 1038 (w), 1021 (w), 1001 (w), 968 (w), 930 (w), 882 (m), 850 (w), 812 (w), 749 (s), 696 (s), 632 (w), 616 (w), 575 (w), 550 (m), 512 (w), 452 (w), 435 (w) cm<sup>-1</sup>; <sup>1</sup>H NMR (CDCl<sub>3</sub>, 400 MHz): δ 7.30–7.15 (10H, m), 5.78 (1H, s), 2.46 (1H, dd, *J* = 8.0, 6.3 Hz), 2.18 (2H, dddd, *J* = 39.6, 16.4, 6.4, 6.4 Hz), 2.07 (1H, ddd, *J* = 17.6, 5.6, 5.6 Hz), 1.99 (1H, dd, *J* = 6.4, 6.4 Hz), 1.81 (1H, ddd, *J* = 18.0, 5.6, 5.6 Hz), 1.70–1.66 (2H, m), 1.63 (1H, dd, *J* = 8.4, 5.6 Hz); <sup>13</sup>C NMR (CDCl<sub>3</sub>, 100 MHz): δ 199.2, 163.4, 145.9, 140.0, 130.0, 128.6, 128.5, 127.8, 127.1, 126.9, 126.6, 40.3, 37.4, 33.8, 29.8, 22.5, 19.4; HRMS (DART): Calcd for C<sub>21</sub>H<sub>21</sub>O<sub>1</sub> [M+H]<sup>+</sup>: 289.15924, Found: 289.15900.

**2-(2,2-Diphenylcyclopropyl)-2-cyclohexen-1-one (16)** was prepared according to the procedure described for 2-cyclopropyl-2-cyclohexen-1-one. 2-Iodo-2-cyclohexen-1-one (1.5 g, 6.9 mmol, 1.0 equiv), 0.26 mol/L solution of 2,2-diphenylcyclopropyl magnesium bromide in thf (31 mL, 8.1 mmol, 1.2 equiv), anhydrous ZnCl<sub>2</sub> (1.4 g, 10 mmol, 1.5 equiv), Pd(PPh<sub>3</sub>)<sub>2</sub>Cl<sub>2</sub> (267 mg, 0.38 mmol, 0.055 equiv), and dmf (30 mL) gave 2-(2,2-diphenylcyclopropyl)-2-cyclohexen-1-one as a colorless crystalline solid (871 mg, 3.0 mmol, 44% yield) after purification by silica gel chromatography (10:1 to 5:1 hexanes:Et<sub>2</sub>O) and subsequent recrystallization at –15 °C from minimal amount of CH<sub>2</sub>Cl<sub>2</sub> and Et<sub>2</sub>O, and excess pentane. m.p. = 120–121 °C. IR (neat): 3057 (m), 3022 (m), 2926 (m), 2865 (s), 2828 (m), 1670 (s), 1600 (m), 1495 (s), 1447 (s), 1430 (m), 1393 (m), 1335 (m), 1178 (m), 1147 (m), 1129 (m), 1073 (m), 1043 (m), 1024 (m), 908 (m), 770 (s), 753 (m), 704 (s), 599 (m), 552 (m), 537 (m) cm<sup>-1</sup>; <sup>1</sup>H NMR (CDCl<sub>3</sub>, 400 MHz): δ 7.60–7.58 (2H, m), 7.28 (2H, dd, *J* = 7.6, 7.6 Hz), 7.18–7.05 (6H, m), 6.17 (1H, dd, *J* = 4.0, 4.0 Hz), 2.76 (1H, app t, *J* = 7.6 Hz), 2.37 (1H, BB' of AA'BB' as app ddd, *J* = 16.4, 9.6, 4.4 Hz), 2.23 (1H, AA' of AA'BB' as app ddd, *J* = 16.4, 8.0, 4.4 Hz), 2.21–2.14 (1H, m), 1.96–1.87 (1H, m), 1.86–1.78 (1H, m), 1.71 (1H, dd, *J* = 6.4, 5.6 Hz), 1.58–1.47 (1H, m), 1.35 (1H, dd, *J* = 8.4, 5.2 Hz);

$^{13}\text{C}$  NMR ( $\text{CDCl}_3$ , 100 MHz):  $\delta$  200.2, 146.6, 144.2, 141.2, 136.7, 130.1, 129.2, 128.4, 127.9, 126.3, 126.2, 38.7, 38.3, 25.9, 25.0, 22.8, 15.8; HRMS (DART): Calcd for  $\text{C}_{21}\text{H}_{21}\text{O}_1$   $[\text{M}+\text{H}]^+$ : 289.15924, Found: 289.15903.

## II. Preparations and analytical data for NHC-catalyzed BCA and SCA products

**3-Cyclopropyl-3-(4,4,5,5-tetramethyl-1,3,2-dioxaborolan-2-yl)cyclohexanone (10):** Under dry  $\text{N}_2$  atmosphere, in a flame-dried vial (8 x 1 cm) equipped with a stir bar, 1,3-dicyclohexylimidazolium tetrafluoroborate (11 mg, 0.033 mmol, 0.096 equiv),  $\text{NaOt-Bu}$  (3.8 mg, 0.040 mmol, 0.12 equiv) and thf (2.0 mL) were subsequently added. The resulting mixture was allowed to stir at 22 °C for 2 h, at which time  $\text{B}_2(\text{pin})_2$  (93 mg, 0.37 mmol, 1.1 equiv) and 3-cyclopropyl-2-cyclohexen-1-one (47 mg, 0.34 mmol, 1.0 equiv) were introduced. The reaction mixture was allowed to stir at 22 °C for 6 h, at which time water (2 mL) was added with vigorous stirring for 15 min. The mixture was then diluted with EtOAc (~4 mL). The layers were separated, and the aqueous layer was washed with EtOAc three times. Combined organic layers were dried over anhydrous  $\text{MgSO}_4$ , filtered and concentrated *in vacuo* to give a white solid. Purification by silica gel chromatography gave 3-cyclopropyl-3-(4,4,5,5-tetramethyl-1,3,2-dioxaborolan-2-yl)cyclohexanone as a colorless oil (77 mg, 0.29 mmol, 85% yield). IR (neat): 3080 (w), 2978 (m), 2934 (w), 2872 (w), 1710 (s), 1447 (w), 1390 (m), 1372 (s), 1310 (s), 1281 (m), 1262 (m), 1229 (w), 1212 (m), 1167 (m), 1141 (s), 1125 (s), 1111 (m), 1088 (w), 1071 (w), 1035 (w), 1018 (w), 968 (w), 916 (m), 853 (s), 824 (w), 775 (w), 730 (s), 693 (w), 669 (m), 647 (m), 579 (w), 539 (w), 520 (w), 478 (w), 461 (w), 426 (w), 412 (w)  $\text{cm}^{-1}$ ;  $^1\text{H}$  NMR ( $\text{CDCl}_3$ , 400 MHz):  $\delta$  2.43 (1H, B of AB,  $J_{\text{AB}} = 14.0$  Hz), 2.22–2.16 (2H, m), 2.05–1.90 (2H, m), 1.98 (1H, A of AB,  $J_{\text{AB}} = 14.0$  Hz), 1.73–1.62 (1H, m), 1.46 (1H, app ddd,  $J = 12.8, 12.8, 2.4$  Hz), 1.16 (12H, s), 0.72–0.65 (1H, m), 0.36–0.21 (4H, m);  $^{13}\text{C}$  NMR ( $\text{CDCl}_3$ , 100 MHz):  $\delta$  212.0, 83.6, 48.4, 41.4, 32.6, 24.9, 24.7, 24.4, 18.9, 1.5, 1.0; HRMS ( $\text{ESI}^+$ ): Calcd for  $\text{C}_{15}\text{H}_{26}\text{BO}_3$   $[\text{M}+\text{H}]^+$ : 265.19750, Found: 265.19750. No products due to ring-opening of the cyclopropane ring were observed.

**2-Cyclopropyl-3-(4,4,5,5-tetramethyl-1,3,2-dioxaborolan-2-yl)cyclohexanone (12):** 2-cyclopropyl-2-cyclohexen-1-one was subjected to the same reaction conditions as above (see compound **10**). 2-Cyclopropyl-2-cyclohexen-1-one (30 mg, 0.22 mmol, 1.0 equiv), 1,3-dicyclohexylimidazolium tetrafluoroborate (14 mg, 0.044 mmol, 0.20 equiv),  $\text{NaOt-Bu}$  (4.6 mg, 0.048 mmol, 0.22 equiv.),  $\text{B}_2(\text{pin})_2$  (63 mg, 0.25 mmol, 1.1 equiv) and thf (1.5 mL) furnished 2-cyclopropyl-3-(4,4,5,5-tetramethyl-1,3,2-dioxaborolan-2-yl)cyclohexanone as a colorless oil (39 mg, 0.15 mmol, 67% yield) after purification by silica gel chromatography (10:1 hexanes:Et<sub>2</sub>O). IR (neat): 3079 (w), 2978 (m), 2931 (m), 2853 (w), 1707 (s), 1449 (w), 1406 (w), 1372 (s), 1323 (s), 1257 (m), 1213 (m), 1167 (m), 1142 (s), 1047 (w), 1019 (m), 983 (m), 971 (m), 925 (w), 905 (w), 871 (w), 852 (s), 813 (w), 735 (m), 716 (w), 688 (m), 668 (m), 578 (w), 527 (w), 441 (w)  $\text{cm}^{-1}$ ;  $^1\text{H}$  NMR ( $\text{CDCl}_3$ , 400 MHz):  $\delta$  2.55–2.47 (1H, m), 2.24–2.18 (1H, m), 2.03–1.88 (2H, m), 1.80–1.66 (3H, m), 1.62–1.58 (1H, m), 1.23 (6H, s), 1.22 (6H, s), 1.13–1.04 (1H, m), 0.54–0.42 (2H, m), 0.22–0.18 (1H, m), 0.14–0.09 (1H, m);  $^{13}\text{C}$  NMR ( $\text{CDCl}_3$ , 100 MHz):  $\delta$  213.3, 83.6,

83.4, 57.1, 40.4, 27.9, 25.1, 24.9, 24.5, 10.8, 5.4, 4.1; HRMS (DART): Calcd for  $C_{15}H_{26}BO_3$   $[M+H]^+$ : 265.19750, Found: 265.19700.

**2-(2,2-Diphenylcyclopropyl)-3-(4,4,5,5-tetramethyl-1,3,2-dioxaborolan-2-yl)cyclohexanone**

**(14)**: Following the procedure described above for compound **12**, 2-(2,2-diphenylcyclopropyl)-3-(4,4,5,5-tetramethyl-1,3,2-dioxaborolan-2-yl)cyclohexanone was prepared in 45% yield. IR (neat): 3023 (w), 2975 (w), 2929 (w), 2860 (w), 1703 (s), 1599 (w), 1494 (m), 1446 (m), 1409 (m), 1371 (m), 1261 (s), 1228 (s), 1215 (m)  $cm^{-1}$ ;  $^1H$  NMR ( $CDCl_3$ , 400 MHz):  $\delta$  7.26 (m, 8H), 7.18–7.11 (m, 2H), 2.54–2.44 (m, 1H), 2.29 (d,  $J = 13.9$  Hz, 1H), 2.19–2.04 (m, 2H), 2.02–1.87 (m, 2H), 1.79 (d,  $J = 2.4$  Hz, 1H), 1.74 (d,  $J = 10.6$  Hz, 1H), 1.70–1.56 (m, 1H), 1.50 (t,  $J = 5.6$  Hz, 1H), 1.18 (dd,  $J = 8.8, 5.2$  Hz, 1H), 1.08 (s, 6H), 1.05 (s, 6H);  $^{13}C$  NMR ( $CDCl_3$ , 100 MHz):  $\delta$  213.4, 146.9, 140.5, 130.3, 128.8, 128.5, 128.3, 126.4, 126.2, 83.5, 50.3, 40.0, 37.2, 28.1, 26.2, 24.8, 24.5, 22.4, 17.9; HRMS (DART): Calcd for  $C_{27}H_{34}B_1O_3$   $[M+H]^+$ : 417.26010, Found: 417.26075. Compound **14** is air-sensitive and was found to undergo oxidation on silica gel to afford **15**, of which the X-ray crystal structure was obtained.

**3-(Dimethyl(phenyl)silyl)-2-(2,2-diphenylcyclopropyl)cyclohexanone (17)**: Under a dry  $N_2$  atmosphere enone **16** (20 mg, 0.071 mmol, 1.0 equiv), ICy-HBF<sub>4</sub> (**3a**) (2.3 mg, 0.0071 mmol, 0.10 equiv), PhMe<sub>2</sub>Si-B(pin) (20 mg, 0.078 mmol, 1.1 equiv), dbu (2.2 mg, 0.014 mmol, 0.20 equiv) and thf (0.11 mL) were mixed in a flamed-dried vial (8 x 1 cm) equipped with a stir bar. The resulting mixture was allowed to stir at 22 °C while H<sub>2</sub>O (0.11 mL) was added. After the reaction mixture was allowed to stir at 22 °C for 12 h, it was diluted with Et<sub>2</sub>O. The layers were separated, and the aqueous layer was washed with Et<sub>2</sub>O three times. Combined organic layers were dried over anhydrous MgSO<sub>4</sub>, filtered, and concentrated *in vacuo* to give a colorless solid. Purification by silica gel chromatography (50:1 hexanes:Et<sub>2</sub>O) afforded 3-(dimethyl(phenyl)silyl)-2-(2,2-diphenylcyclopropyl)cyclohexanone **17** as a colorless oil (7.2 mg, 0.017 mmol, 24 % yield). No products due to cyclopropane ring opening were observed. IR (neat): 3056 (w), 3023 (w), 2927 (m), 2857 (w), 2836 (w), 1663 (m), 1600 (w), 1494 (m), 1446 (w), 1428 (w), 1369 (w), 1352 (w), 1253 (m), 1193 (m), 1171 (m), 1137 (m), 1118 (m), 1077 (w), 1023 (m)  $cm^{-1}$ ;  $^1H$  NMR ( $CDCl_3$ , 400 MHz):  $\delta$  7.60–7.55 (m, 2H), 7.42–7.27 (m, 5H), 7.25–7.06 (m, 8H), 2.66–2.58 (m, 1H), 2.02 (t,  $J = 5.8$  Hz, 2H), 1.65 (dd,  $J = 6.9, 5.1$  Hz, 1H), 1.52–1.44 (m, 1H), 1.41–1.36 (m, 2H), 1.36–1.26 (m, 1H), 1.26–1.15 (m, 1H), 1.07–0.95 (m, 1H), 0.77 (dd,  $J = 16.0, 5.4$  Hz, 1H), 0.47 (s, 6H);  $^{13}C$  NMR ( $CDCl_3$ , 100 MHz):  $\delta$  147.7, 147.4, 142.1, 138.4, 133.5, 130.6, 129.7, 128.2, 128.0, 127.9, 127.9, 126.1, 125.5, 112.6, 35.1, 30.9, 30.5, 28.4, 26.4, 23.3, 22.6, 18.7, 0.16, 0.01; HRMS (DART): Calcd for  $C_{29}H_{33}Si_1O_1$   $[M+H]^+$ : 425.23007, Found: 425.22897.

■ **Analytical Data for  $^{13}C$ -Labeled Imidazolinium Salt 7c**

**$^{13}C$ -Labeled Imidazolinium Salt 7c** was prepared according to the reported procedure.<sup>6</sup> IR (neat): 3061 (m), 3035 (m), 2923 (w), 1618 (m), 1574 (s), 1487 (m), 1457 (m), 1444 (m), 1275 (s), 1216 (s), 1054 (s), 827 (s), 770 (s), 755 (s), 736 (s), 699 (s), 595 (m), 522 (s)  $cm^{-1}$ ;  $^1H$  NMR ( $CDCl_3$ , 400 MHz):  $\delta$  8.95 (d,  $J_{C-H} = 208.8$  Hz, 1H), 7.56–7.44 (m, 6H), 7.35–7.30 (m, 6H),

7.25–7.16 (m, 6H), 7.10–7.04 (m, 4H), 6.71–6.69 (m, 4H), 4.68 (s, 2H), 2.28 (s, 6H);  $^{13}\text{C}$  NMR ( $\text{CDCl}_3$ , 100 MHz):  $\delta$  157.2 ( $^{13}\text{C}$  labeled carbon), 139.8, 138.1, 134.6, 133.7, 131.4, 131.3, 131.0, 130.7, 129.9, 129.4, 129.3, 129.2, 128.4, 128.3, 128.1, 99.1, 75.0, 20.8;  $^{11}\text{B}$  NMR ( $d_8$ -thf, 160 MHz):  $\delta$  -1.7 (s);  $^{19}\text{F}$  NMR ( $d_8$ -thf, 376 MHz):  $\delta$  -152 (s, 4F); HRMS (ESI<sup>+</sup>): Calcd for  $^{12}\text{C}_{40}^{13}\text{C}_1\text{H}_{35}\text{N}_2$   $[\text{M}-\text{BF}_4]^+$ : 556.2828, Found: 556.2837; Specific Rotation:  $[\alpha]_{\text{D}}^{22}$  -489.8 (*c* 1.1,  $\text{CHCl}_3$ ).

#### ■ Analytical Data for Compound 43

Formamide **43**: In a  $\text{N}_2$  filled glove box, imidazolium tetrafluoroborate salt **7c** (19.2 mg, 0.030 mmol, 1.0 equiv), KHMDS (6.0 mg, 0.030 mmol, 1.0 equiv) and thf (0.50 mL, 0.06 M solution of **7c**) were charged into an oven-dried vial (8 x 1 cm) equipped with a stir bar. The mixture was moved out of the glove box and allowed to stir at 22 °C under  $\text{N}_2$  atm for 30 min. Then 1.5 mL  $\text{H}_2\text{O}$  was added into the reaction mixture, resulting in a colorless homogeneous solution. This solution was allowed to stir at 22 °C under  $\text{N}_2$  atm for 1.75 h, before addition of  $\text{Et}_2\text{O}$  (2 mL). The layers were separated and the aqueous layer was washed with  $\text{Et}_2\text{O}$  twice. Combined organic layers were dried over anhydrous  $\text{MgSO}_4$ , filtered, and concentrated *in vacuo* to give a colorless oil, which was purified by silica gel chromatography (6:1 hexanes: $\text{Et}_2\text{O}$ ) to yield 16 mg (0.028 mmol, 93% yield) of formamide **43** as a viscous oil with ~15% unknown impurities. Various chromatography conditions (different eluting solvents or  $\text{Al}_2\text{O}_3$  chromatography) as well as recrystallizations were not effective to obtain a pure sample of **43**. The  $^1\text{H}$  NMR signals of those impurities are at 7.57 (m), 5.03 (m), 4.88 (m), 3.84 (m), 3.63 (m), 1.38 (d,  $J = 5.6$  Hz), 0.977 (d,  $J = 5.6$  Hz) ppm. Nevertheless, the X-ray crystal structure of **43** was still obtained. IR (neat): 3406 (w), 3060 (w), 3029 (w), 2923 (m), 2854 (m), 1674 (s), 1615 (m), 1578 (m), 1570 (m), 1521 (m), 1490 (m), 1454 (m), 1442 (m), 1424 (m), 1303 (m), 1287 (m), 1263 (m), 1199 (w), 1177 (w), 1136 (w), 1073 (w), 1009 (m), 804 (m), 763 (m), 745 (m), 699 (s), 636 (w), 548 (m)  $\text{cm}^{-1}$ ;  $^1\text{H}$  NMR (400 MHz,  $\text{CDCl}_3$ ):  $\delta$  8.06 (s, 1H), 7.51–7.37 (5H, m), 7.21–7.18 (1H, m), 7.08–6.87 (14H, m), 6.58–6.33 (6H, m), 5.66 (1H, br s), 5.34 (1H, app d,  $J = 6.8$  Hz), 4.92 (1H, br s), 2.32 (3H, s), 2.26 (3H, s);  $^{13}\text{C}$  NMR (100 MHz,  $\text{CDCl}_3$ ):  $\delta$  164.6, 144.0, 140.8, 139.3, 138.7, 138.3, 138.2, 131.5, 130.2, 130.2, 129.8, 129.1, 128.8, 128.1, 128.1, 128.0, 127.9, 127.8, 127.4, 127.0, 126.7, 126.3, 118.0, 112.0, 62.5, 61.2, 21.9, 21.2; HRMS (ESI<sup>+</sup>): Calcd for  $\text{C}_{41}\text{H}_{37}\text{N}_2\text{O}_1$   $[\text{M}+\text{H}]^+$ : 573.29059, Found: 573.28998; Optical rotation:  $[\alpha]_{\text{D}}^{21}$  -147.7 (*c* 0.70,  $\text{CHCl}_3$ ).

#### ■ Analytical Data for $\beta$ -Silyl Carbonyl 33c

(*R*)-4-(Dimethyl(phenyl)silyl)-4-(4-(trifluoromethyl)phenyl)butan-2-one (**33c**): In dry  $\text{N}_2$  atmosphere, imidazolium tetrafluoroborate salt **7c** (14 mg, 0.023 mmol, 7.5 mol %) was charged into an oven-dried vial (8 x 1 cm) equipped with a stir bar. *Dbu* was added into the vial by syringe (10  $\mu\text{L}$ , 10 mg, 0.068 mmol, 22.5 mol %), followed by addition of  $\text{PhMe}_2\text{Si}-\text{B}(\text{pin})$  (90  $\mu\text{L}$ , 87 mg, 0.33 mmol, 1.1 equiv). The mixture was allowed to stir for ~ 5 seconds before it was added a solution of (*E*)-4-(4-(trifluoromethyl)phenyl)but-3-en-2-one (64 mg, 0.30 mmol, 1.0 equiv) in 1.0 mL thf by syringe. This was immediately followed by addition of water (18  $\mu\text{L}$ , 18 mg, 3.3 equiv). The mixture was allowed to stir for 1 h at 22 °C. Pentane (5 mL) was added to

the solution (to facilitate imidazolinium salt precipitation), and the resulting solution was dried over anhydrous  $\text{MgSO}_4$ , filtered, and concentrated *in vacuo*. The resulting clear oil was purified by silica gel chromatography (5:1 hexanes: $\text{Et}_2\text{O}$ ) to give 90 mg (0.26 mmol, 86% yield) of (*R*)-4-(Dimethyl(phenyl)silyl)-4-(4-(trifluoromethyl)phenyl)butan-2-one (**33c**). The spectroscopic data match those reported previously.<sup>7</sup> The absolute configuration was assigned by analogy to  $\beta$ -silyl ketones previously reported.<sup>2c</sup> IR (neat): 3070 (w), 2960 (w), 1718 (m), 1615 (w), 1580 (w), 1515 (w), 1419 (w), 1357 (w), 1323 (s), 1251(w), 1188 (w), 1161 (s), 1108 (s), 1067 (s), 1015 (w), 998 (w), 952 (w), 910 (w), 850 (w), 831 (w), 807 (s), 773 (s), 734 (s), 670 (m), 646 (s), 611 (s), 599 (w), 569 (w), 537 (w), 513 (w), 467 (w), 420 (w)  $\text{cm}^{-1}$ ;  $^1\text{H}$  NMR (500 MHz,  $\text{CDCl}_3$ ):  $\delta$  7.43 (overlapping d,  $J = 8$  Hz, 2H), 7.42–7.33 (m, 5H), 7.02 (overlapping d,  $J = 8$  Hz, 2H), 2.99 (dd,  $J = 11.0, 3.5$  Hz, 1H), 2.93 (dd,  $J = 16.5, 11.0$  Hz, 1H), 2.69 (dd,  $J = 16.5, 3.5$  Hz, 1H), 1.97 (s, 3H), 0.25 (s, 3H), 0.23 (s, 3H);  $^{13}\text{C}$  NMR (100 MHz,  $\text{CDCl}_3$ ):  $\delta$  207.4, 146.9, 146.9, 154.0, 134.2, 129.7, 128.0, 127.8, 125.2 (q,  $J_{\text{C-F}} = 29.6, 14.8$  Hz), 43.8, 31.7, 30.1,  $-4.1, -5.2$ ;  $^{19}\text{F}$  NMR (376 MHz,  $d_8$ -thf):  $-60$  ppm (s, 3F). Optical rotation:  $[\alpha]_{\text{D}}^{22} +5.6$  ( $c$  1.8,  $\text{CHCl}_3$ ) for a sample with 87:13 er.

Enantiomeric purity was determined by HPLC analysis in comparison with authentic racemic material (96:4 er shown, Chiralpak AD-H column, 99/1 hexanes/*i*-propanol, 0.3 mL/min, 220 nm).

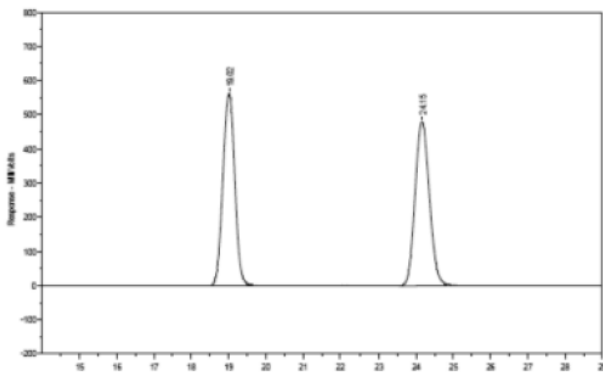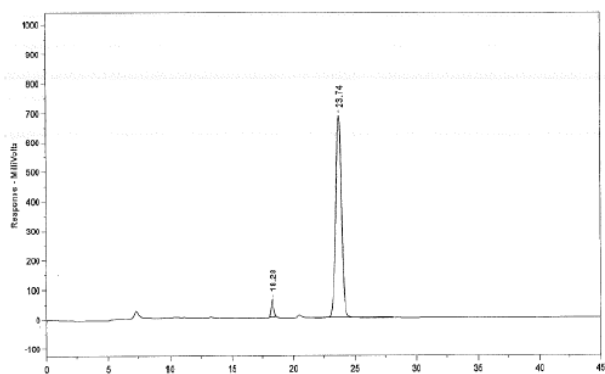

| Peak # | Time (min) | Area (%) | Peak # | Time (min) | Area (%) |
|--------|------------|----------|--------|------------|----------|
| 1      | 19.02      | 49.149   | 1      | 18.28      | 4.420    |
| 2      | 24.15      | 50.851   | 2      | 23.74      | 95.580   |

### ■ NMR Studies on Probing the Formation of Chiral NHC•diboron Complex

**General procedure:** In a  $\text{N}_2$  filled glove box, an oven-dried vial (8 x 1 cm) equipped with a stir bar was charged with **7c** (39 mg, 0.060 mmol, 1.0 equiv), dbu (55 mg, 0.36 mmol, 6.0 equiv) and  $\text{thf-}d_8$  (0.60 mL, 0.10 M solution of **7c**). The mixture was allowed to stir for 30 min at 22 °C.  $\text{B}_2(\text{pin})_2$  (15 mg, 0.060 mmol, 1.0 equiv) was added to the vial, followed by the addition of MeOH (73  $\mu\text{L}$ , 58 mg, 1.8 mmol, 30 equiv). The mixture was transferred into a Wilmad LabGlass 600 MHz Quartz NMR tube, which was sealed with a NMR cap before removal from the glove box. The  $^{11}\text{B}$  NMR spectra were recorded subsequently.



Figure S1 shows the spectra of a series of control experiments where NHC was not present.

**Figure S1.**  $^{11}\text{B}$  NMR spectra of control experiments

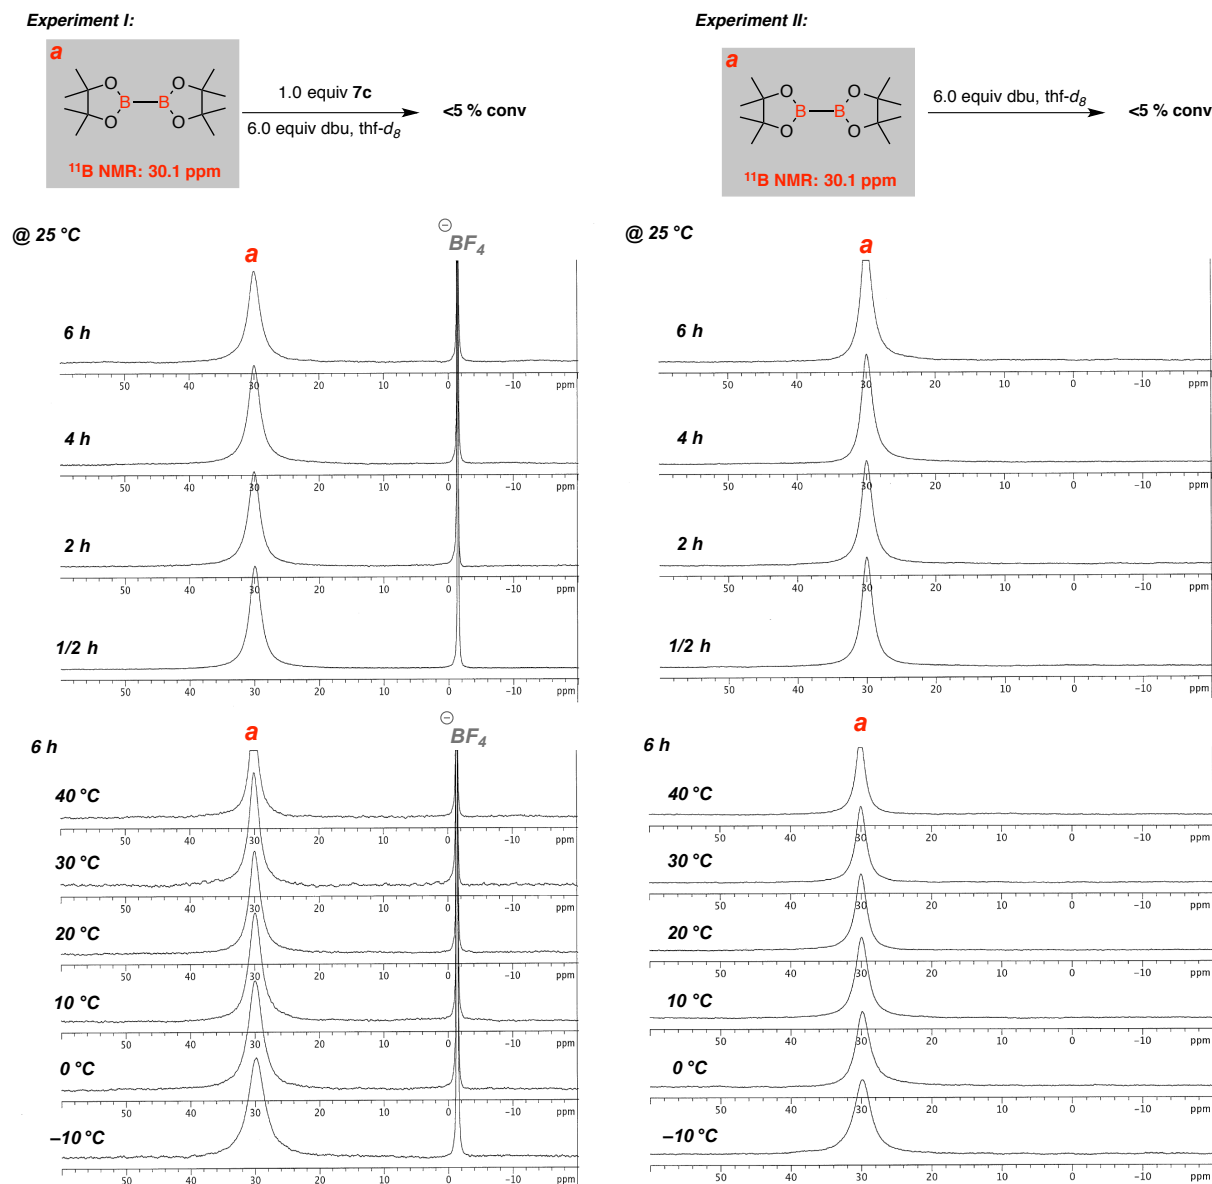

### ■ NMR Studies on Probing the Formation of Chiral NHC•borosilane Complex

**General procedure:** In a  $\text{N}_2$  filled glove box, an oven-dried vial (8 x 1 cm) equipped with a stir bar was charged with **7c** (39 mg, 0.060 mmol, 1.0 equiv), dbu (55 mg, 0.36 mmol, 6.0 equiv) and  $\text{thf-}d_8$  (0.60 mL, 0.10 M solution of **7c**). The mixture was allowed to stir for 30 min at 22 °C.  $\text{PhMe}_2\text{Si-B}(\text{pin})$  (16 mg, 0.060 mmol, 1.0 equiv) was added to the vial, followed by the addition of  $\text{H}_2\text{O}$  (6.5  $\mu\text{L}$ , 6.5 mg, 0.36 mmol, 6.0 equiv). The mixture was transferred into a Wilmad LabGlass 600 MHz Quartz NMR tube, which was sealed with a NMR cap before removal from

the glovebox. The  $^{11}\text{B}$  NMR spectra were recorded subsequently.

Figures S2–S6 show the  $^{11}\text{B}$  NMR spectra where either  $\text{H}_2\text{O}$  (6.0 equiv) or  $\text{MeOH}$  (30 or 2.0 equiv) was present. Unfortunately, we could not detect the formation of the chiral NHC•borosilane complex. This is probably due to significant decompositions of  $\text{PhMe}_2\text{Si-B}(\text{pin})$  under these homogeneous solutions. Indeed,  $\text{H-SiMe}_2\text{Ph}$  was generated during the NMR experiments and detected by  $^1\text{H}$  NMR spectrum by means of the signal that appears at 4.4 ppm.

**Figure S2.**  $^{11}\text{B}$  NMR spectra for reaction of  $(\text{pin})\text{B-SiMe}_2\text{Ph}$  with  $\text{H}_2\text{O}$  and  $\text{dbu}$  ( $\text{thf-d}_8$ ,  $25^\circ\text{C}$ )

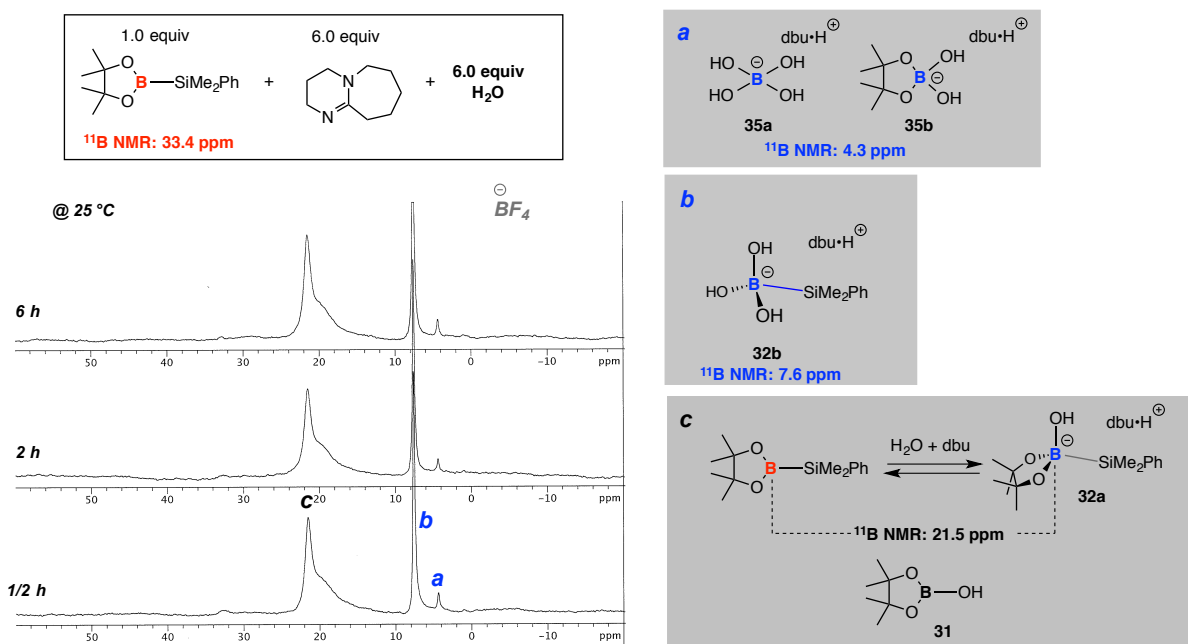

**Figure S3.**  $^{11}\text{B}$  NMR spectra for reaction of  $(\text{pin})\text{B-SiMe}_2\text{Ph}$  with a chiral NHC in the presence of 30 equiv  $\text{MeOH}$  and  $\text{dbu}$  ( $\text{thf-d}_8$ ,  $25^\circ\text{C}$ )

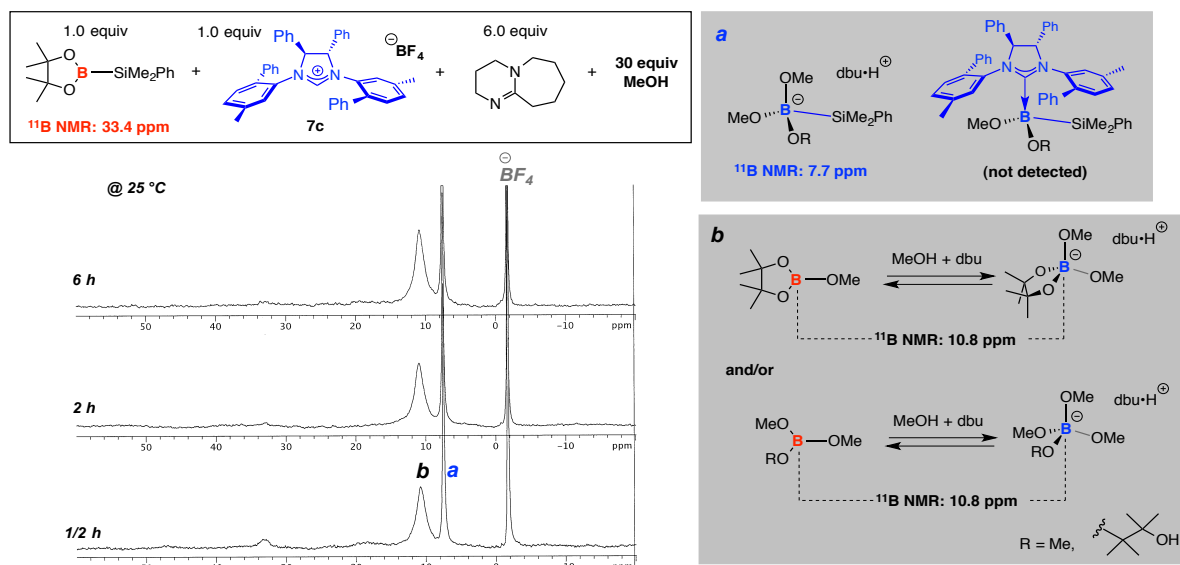

**Figure S4.**  $^{11}\text{B}$  NMR spectra for reaction of (pin)B–SiMe<sub>2</sub>Ph with 30 equiv MeOH and dbu (thf-*d*<sub>8</sub>, 25 °C)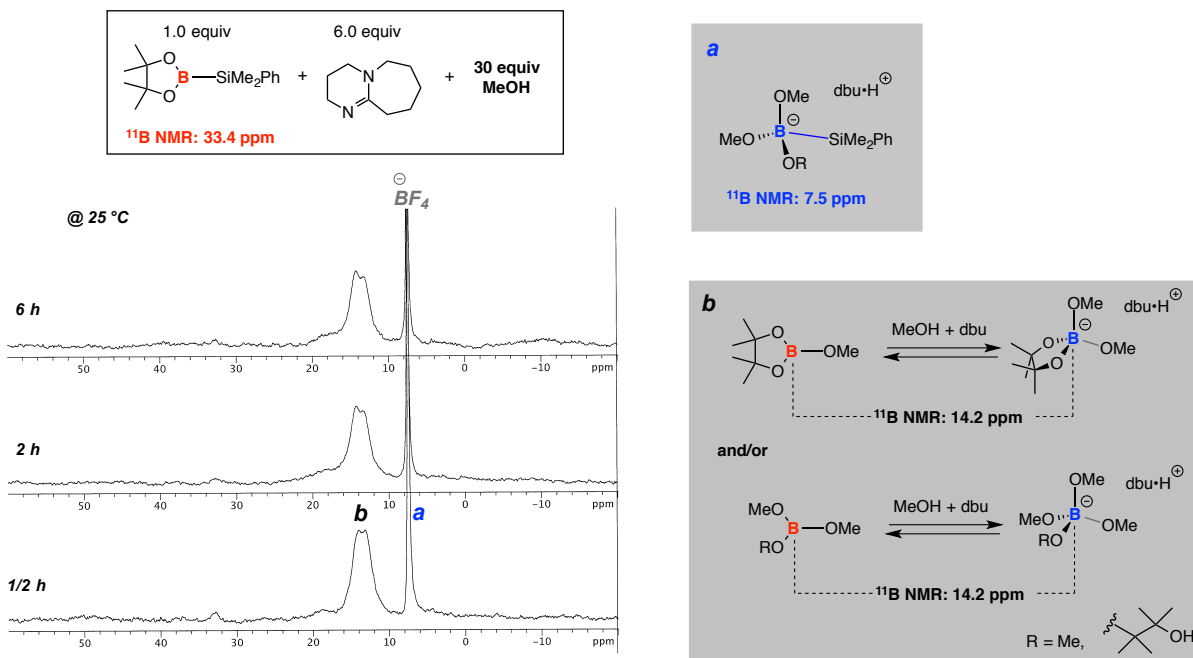**Figure S5.**  $^{11}\text{B}$  NMR spectra for reaction of (pin)B–SiMe<sub>2</sub>Ph with a chiral NHC in the presence of 2.0 equiv MeOH and dbu (thf-*d*<sub>8</sub>, 25 °C)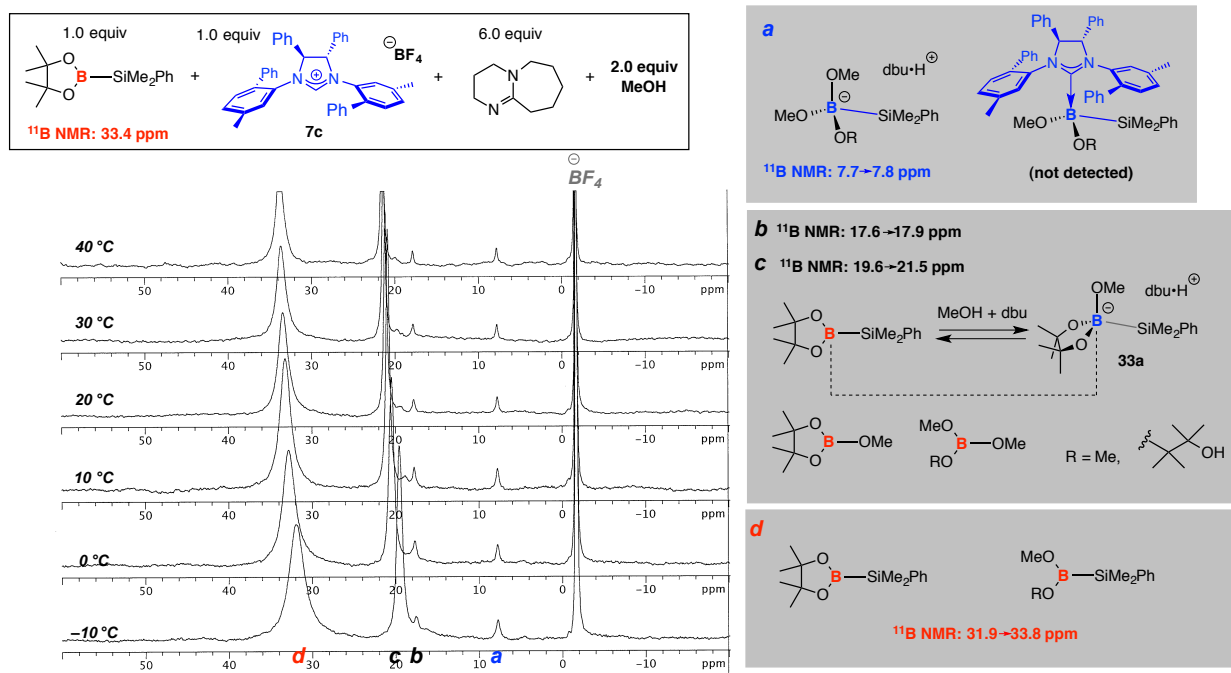

**Figure S6.**  $^{11}\text{B}$  NMR spectra for reaction of (pin)B–SiMe<sub>2</sub>Ph with 2.0 equiv MeOH and dbu (thf-*d*<sub>8</sub>, 25 °C)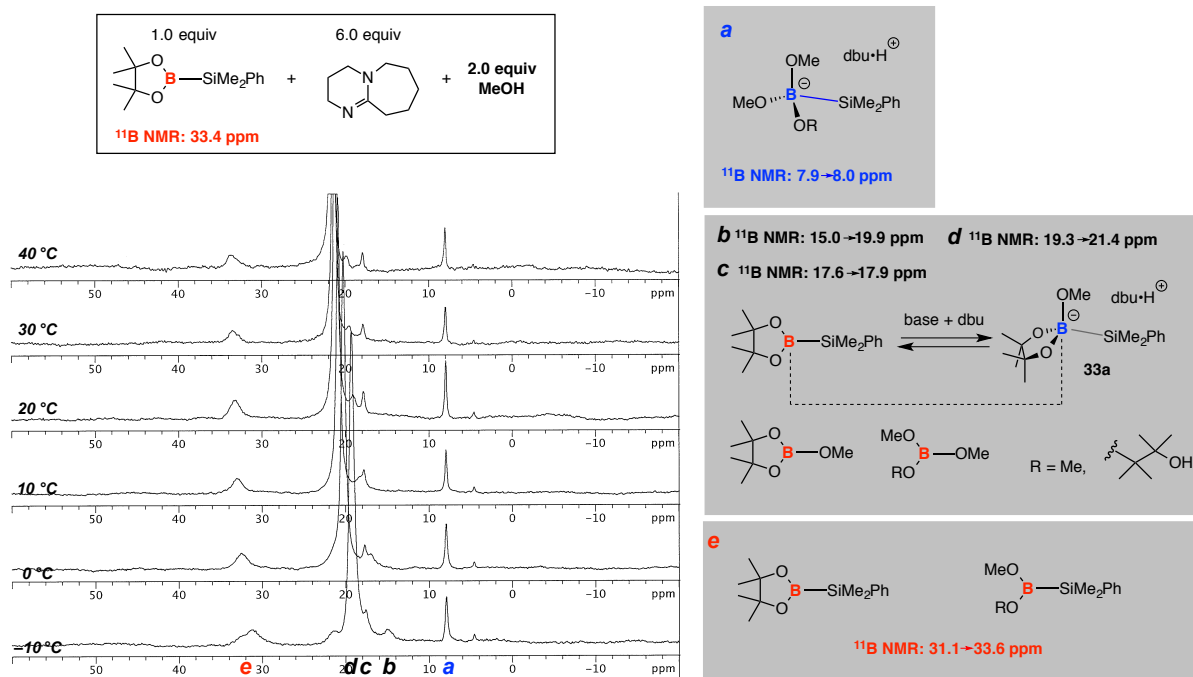

**Dimethyl(dimethyl(phenyl)silyl)boronate (37)** was obtained as a mixture, through the use of a modified procedure reported for the synthesis of PhMe<sub>2</sub>Si–B(pin).<sup>8</sup> A 100 mL flame-dried Schlenk flask equipped with a stir bar was charged with Li (0.12 g, 18 mmol, 6.0 equiv) and mineral oil (5 mL) under argon. The mixture was allowed to heat to 180 °C and stirred vigorously for 10 min. The suspension was then allowed to cool to 22 °C. The Li particles were washed with thf (3 x 5 mL). Then 3 mL of thf was added into the flask. To the suspension, chlorodimethylphenylsilane (0.5 mL, 3.0 mmol, 1.0 equiv) was added drop-wise at 0 °C. The resulting suspension was allowed to stir at 0 °C for 6 h to generate dimethylphenylsilyllithium completely. To a stirred solution of trimethylborate (0.49 mL, 3.6 mmol, 1.2 equiv) in hexanes (3.0 mL) in another flame-dried Schlenk flask was added the previously prepared dimethylphenylsilyllithium solution drop-wise at 0 °C. The resulting solution was allowed to stir at 22 °C for 12 h. The mixture was filtered through a plug of celite twice, diluted with hexanes and the filtrate was concentrated *in vacuo*. Purification of the resulting light yellow oil by silica gel chromatography or distillation *in vacuo* resulted in complete decomposition of the desired product. The desired product also decomposed in a day at 22 °C under N<sub>2</sub>. Thus the material was used immediately after synthesis. The presence of dimethyl(dimethyl(phenyl)silyl)boronate (**37**) was confirmed by HRMS (DART): Calcd for C<sub>10</sub>H<sub>18</sub>Si<sub>1</sub>O<sub>2</sub>B<sub>1</sub> [M+H]<sup>+</sup>: 209.11691, Found: 209.11632. Due to the instability of the compound and lack of an effective purification method, other characterization data were not available.

**Scheme S1.** Synthesis of  $\text{PhMe}_2\text{Si-B(OMe)}_2$  (**37**)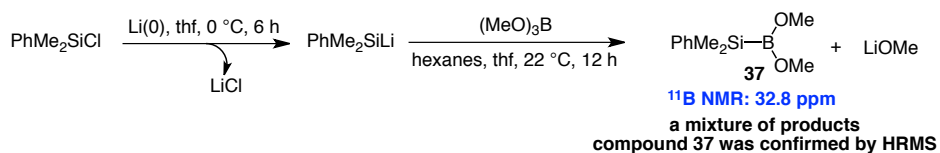

**Preparation of NHC•borosilane Complex (39):** In a  $\text{N}_2$  filled glove box, an oven-dried vial (8 x 1 cm) equipped with a stir bar was charged with imidazolium salt **7c** (19 mg, 0.030 mmol, 1.0 equiv), KHMDS (6.0 mg, 0.030 mmol, 1.0 equiv) and  $\text{thf-}d_8$  (0.60 mL, 0.05 M solution of **7c**). The resulting mixture was allowed to stir for 30 min at 22 °C. Dimethyl(dimethyl(phenyl)silyl)boronate (**37**) (6.2 mg as a mixture, 0.030 mmol, 1.0 equiv) was then added to the vial. The mixture was transferred into a Wilmad LabGlass 600 MHz Quartz NMR tube, which was sealed with a NMR cap before removal from the glovebox. The  $^{11}\text{B}$  NMR spectra were recorded subsequently.

As mentioned in the manuscript, we detected a new signal (−0.4 ppm, signal **a**), which may correspond to the chiral NHC•borosilane complex **39**. Control experiment including the same chiral NHC and  $\text{B(OMe)}_3$  indicated a different signal at 1.4 ppm (complex **40**, signal **a**, Figure S7). When an achiral imidazolium salt (**3b**) was used instead of **7c**, we also detected the NHC•borosilane complex **41** (0.1 ppm, signal **a**, Figure S8). The  $^{11}\text{B}$  NMR spectrum of  $\text{PhMe}_2\text{Si-B(OMe)}_2$ (**37**) in a mixture is shown in Figure S9.

**Figure S7.**  $^{11}\text{B}$  NMR spectrum for reaction of  $\text{B(OMe)}_3$  with a chiral NHC ( $\text{thf-}d_8$ , 25 °C)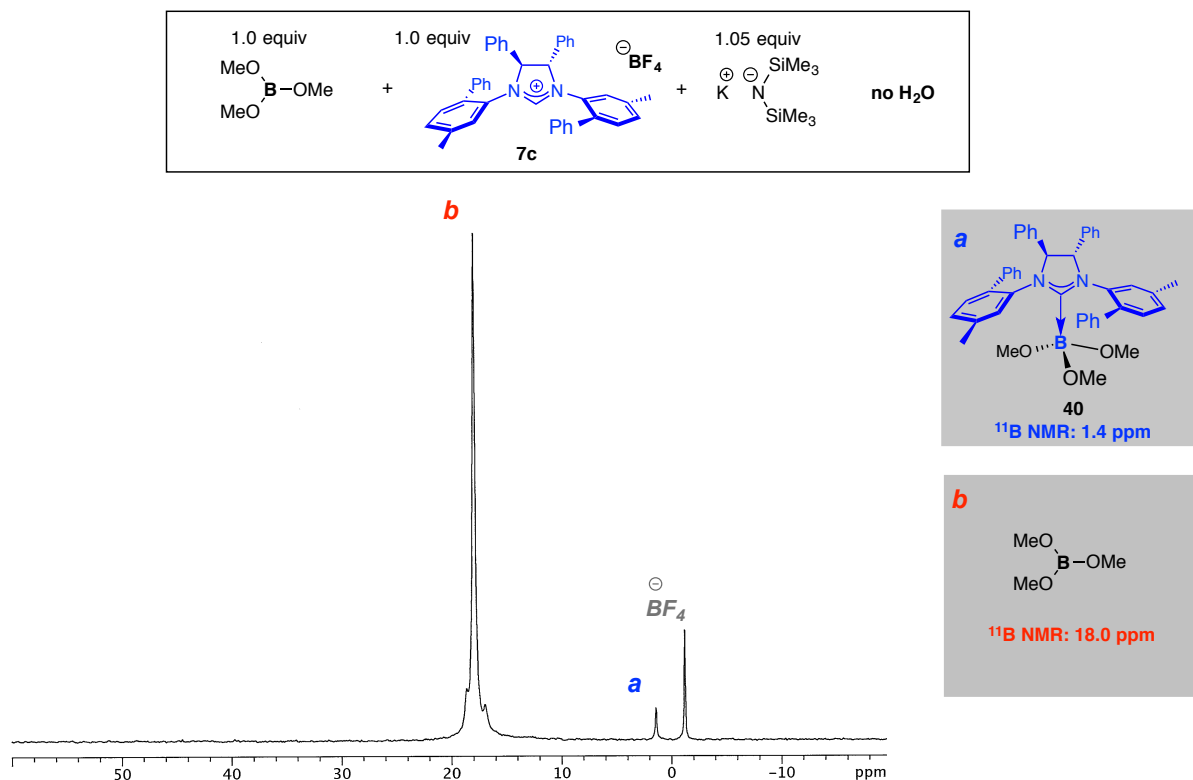

**Figure S8.**  $^{11}\text{B}$  NMR spectrum for reaction of  $(\text{MeO})_2\text{B}-\text{SiMe}_2\text{Ph}$  with an achiral NHC ( $\text{thf}-d_8$ ,  $25^\circ\text{C}$ )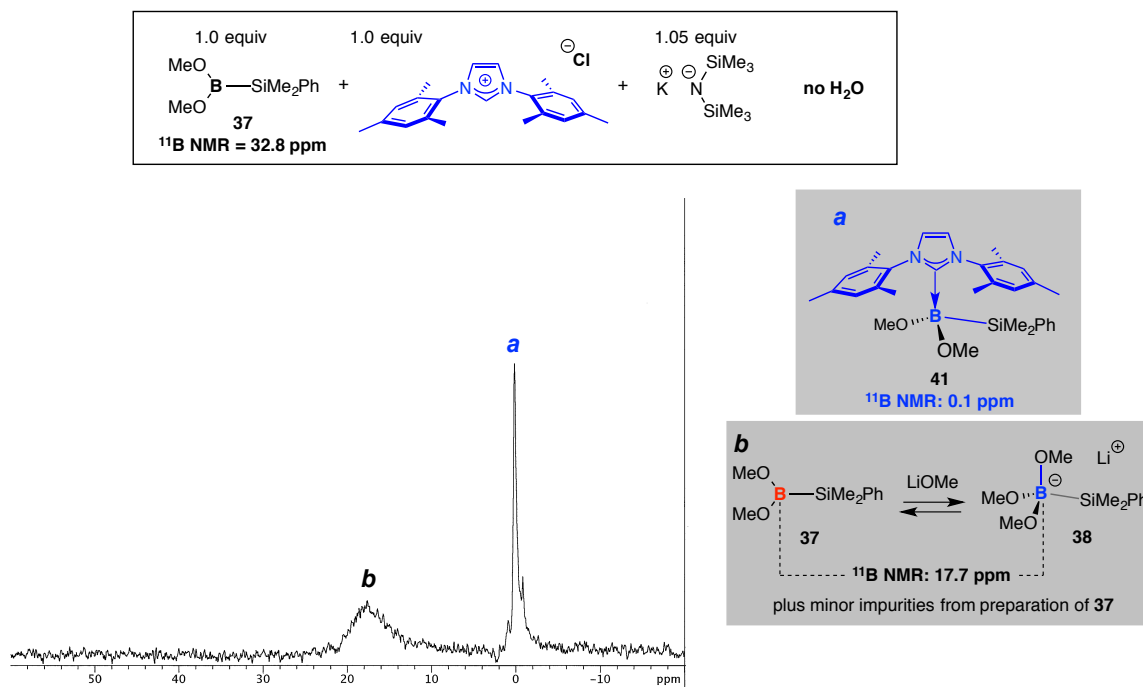**Figure S9.**  $^{11}\text{B}$  NMR spectrum of  $(\text{MeO})_2\text{B}-\text{SiMe}_2\text{Ph}$  as a mixture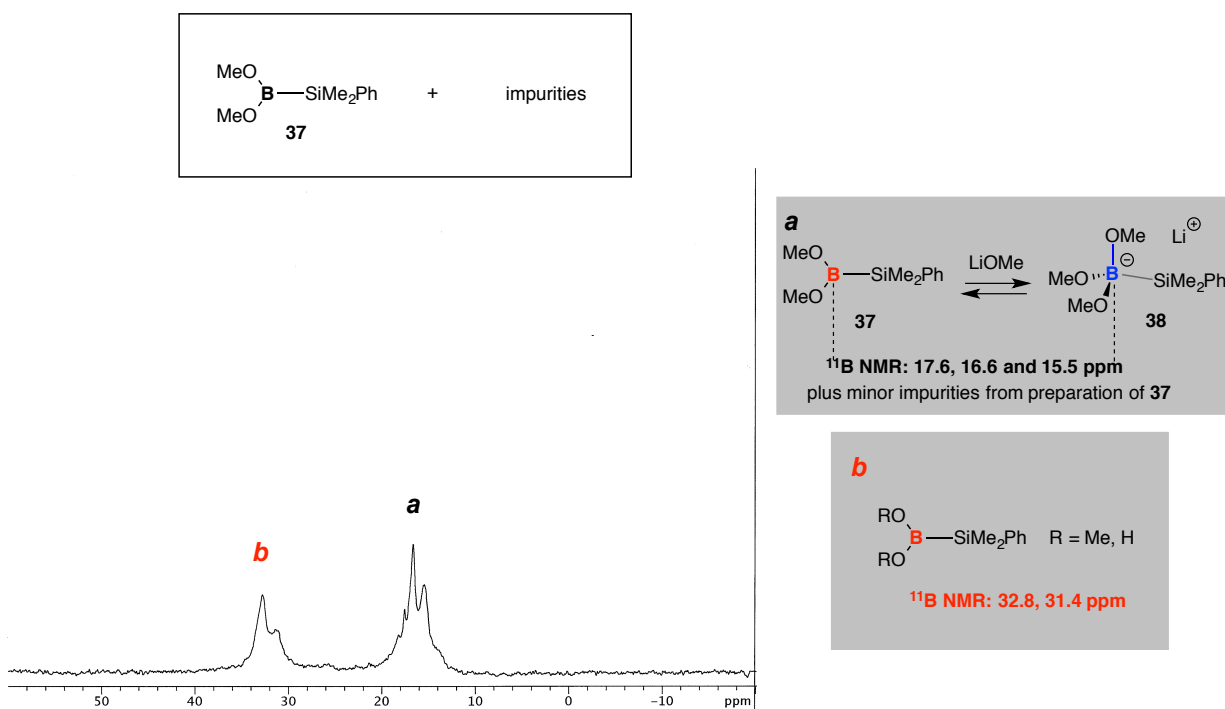

**Preparation of  $^{13}\text{C}$ -labeled NHC•borosilane Complex (**39**):** According to the procedure previously mentioned,  $^{13}\text{C}$ -labeled NHC•borosilane complex (**39**) was prepared through deprotonation and coordination with  $\text{PhMe}_2\text{Si}-\text{B}(\text{OMe})_2$  (**37**) (Scheme S2). As mentioned in the

manuscript, complex NHC•BF<sub>3</sub> (**42**) was formed during the deprotonation, which was characterized by <sup>13</sup>C NMR (Figure S10), <sup>11</sup>B NMR and <sup>19</sup>F NMR (Figure S12). The broad signals in the <sup>11</sup>B NMR and <sup>19</sup>F NMR of complex **42** are probably due to a fast equilibrium between complex **42** and NHC + KBF<sub>4</sub> in the solution (Figure S12). Treatment of complex **42** with PhMe<sub>2</sub>Si-B(OMe)<sub>2</sub> (**37**) resulted in the <sup>13</sup>C-labeled NHC•borosilane complex (**39**), of which a new signal in the <sup>13</sup>C NMR spectrum has been detected (181.2 ppm, Figure S11). However, we did not detect any <sup>11</sup>B–<sup>13</sup>C(carbene) coupling. This is likely because the NHC•borosilane complex formation and dissociation are reversible and occur rapidly in solution.

**Scheme S2.** Probing the Formation of a Chiral NHC•Borosilane Complex by Spectroscopic Analysis of a <sup>13</sup>C-Labeled Chiral NHC

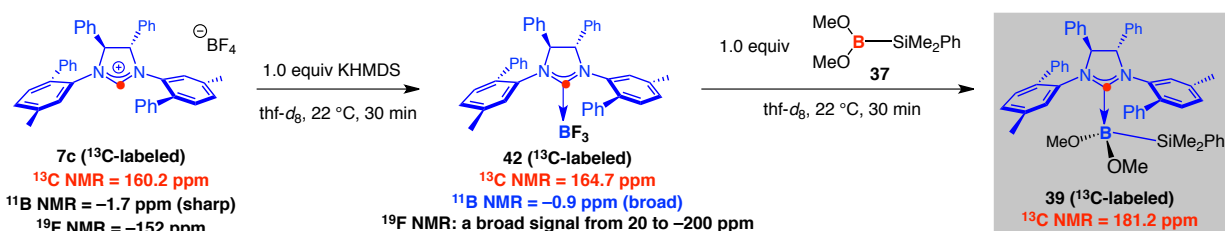

**Figure S10.** <sup>13</sup>C NMR spectra for a chiral NHC and its complex with BF<sub>3</sub>

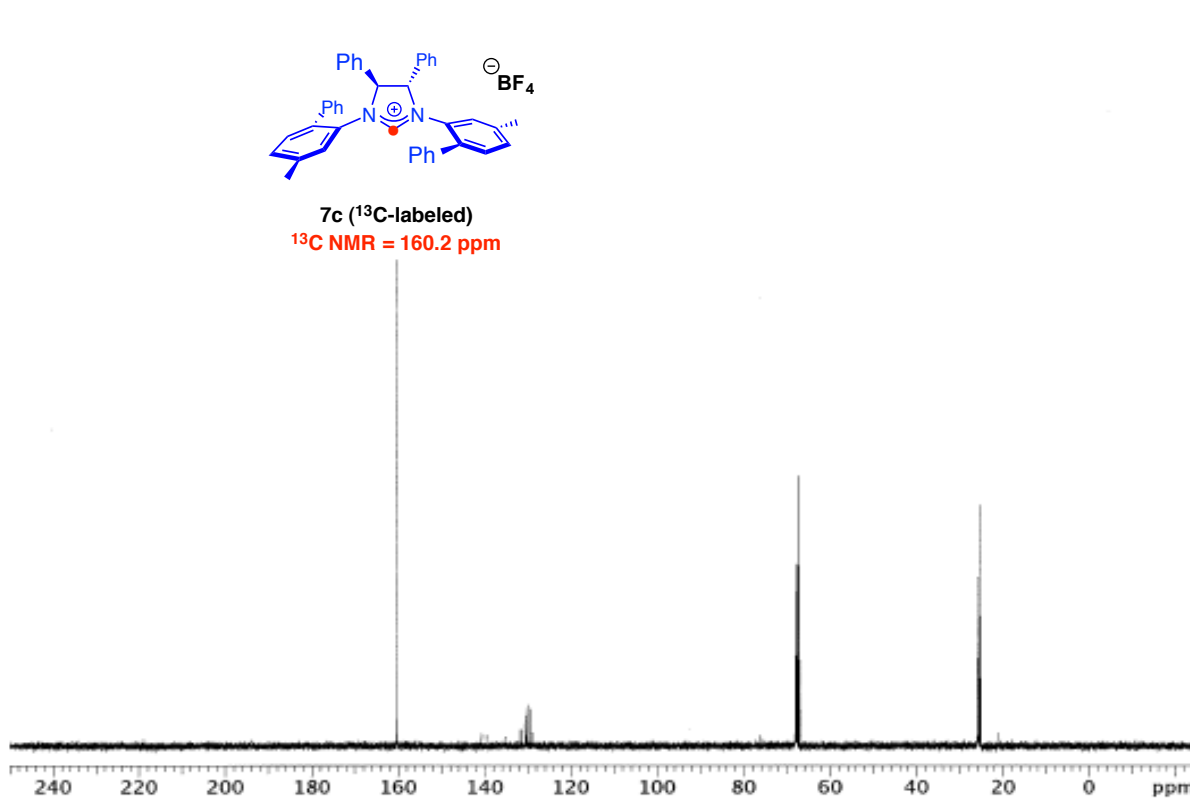

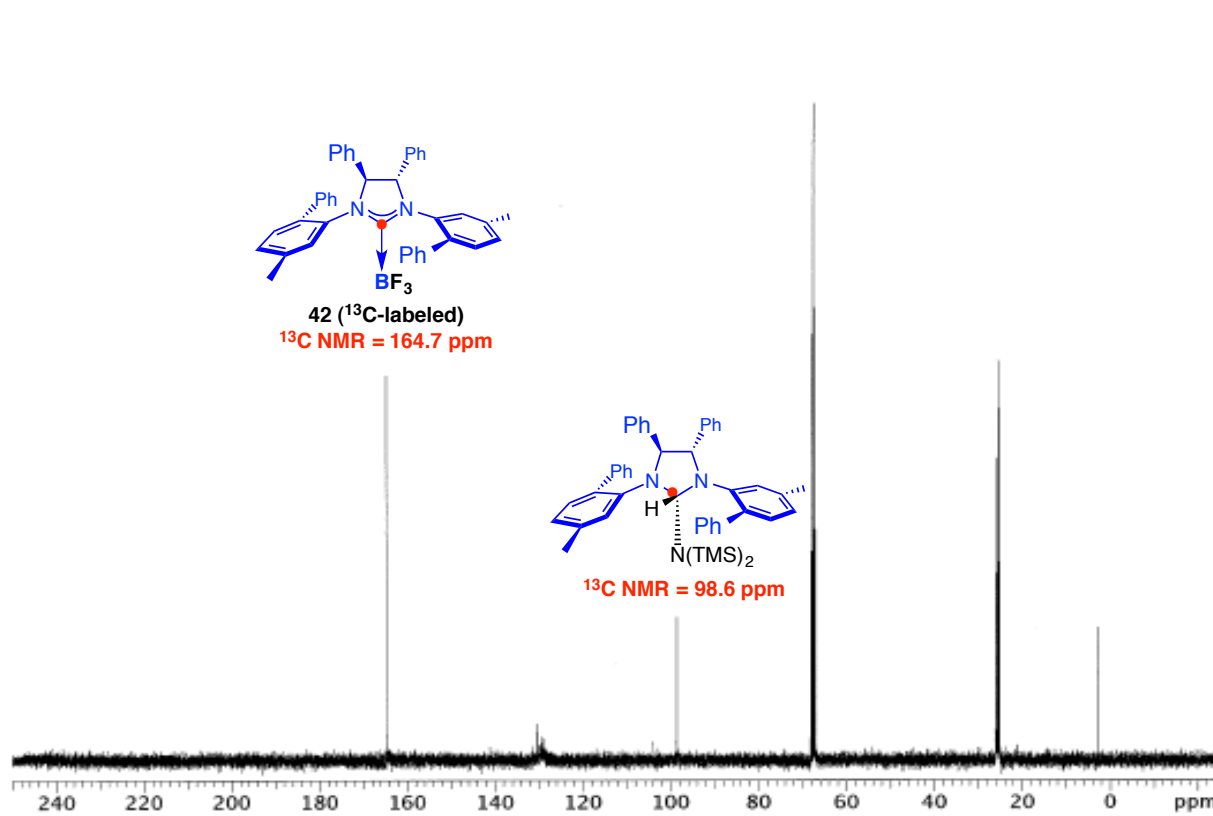

**Figure S11.**  $^{13}\text{C}$  NMR spectrum for a chiral NHC•Borasilane Complex

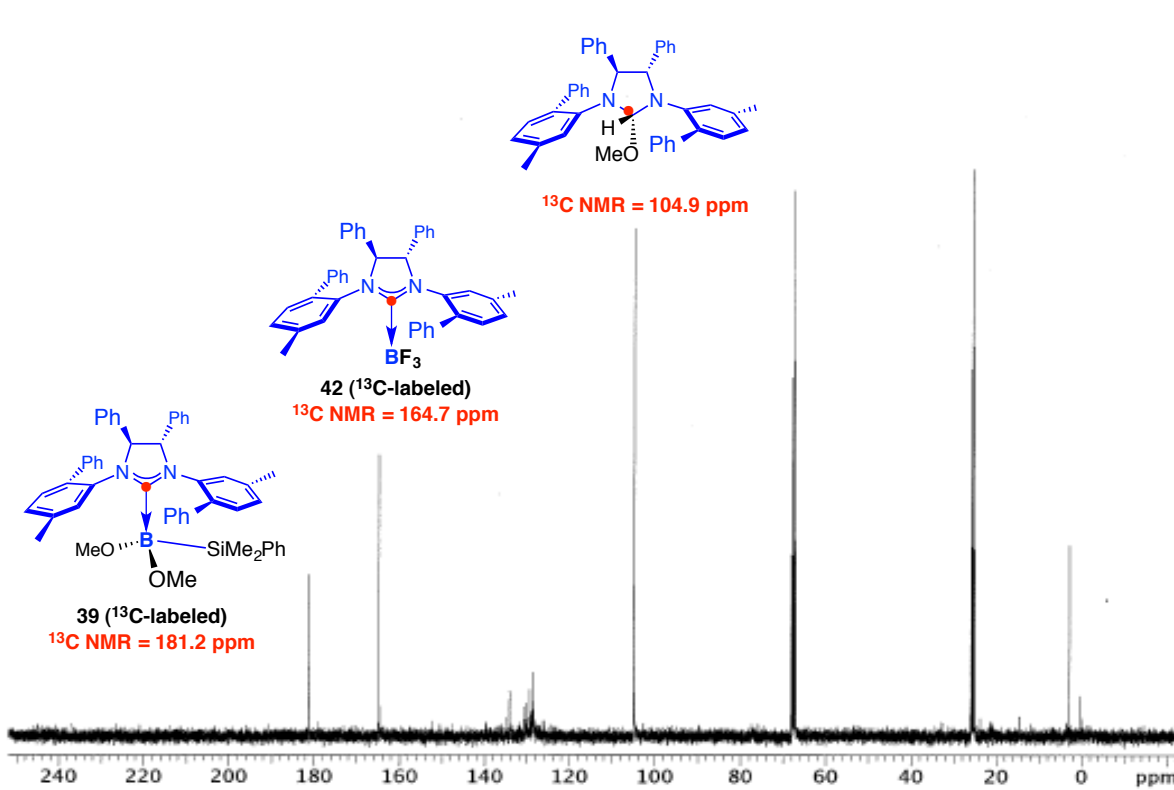



**Figure S12.**  $^{11}\text{B}$  NMR and  $^{19}\text{F}$  NMR spectra for a chiral NHC and its complex with  $\text{BF}_3$ 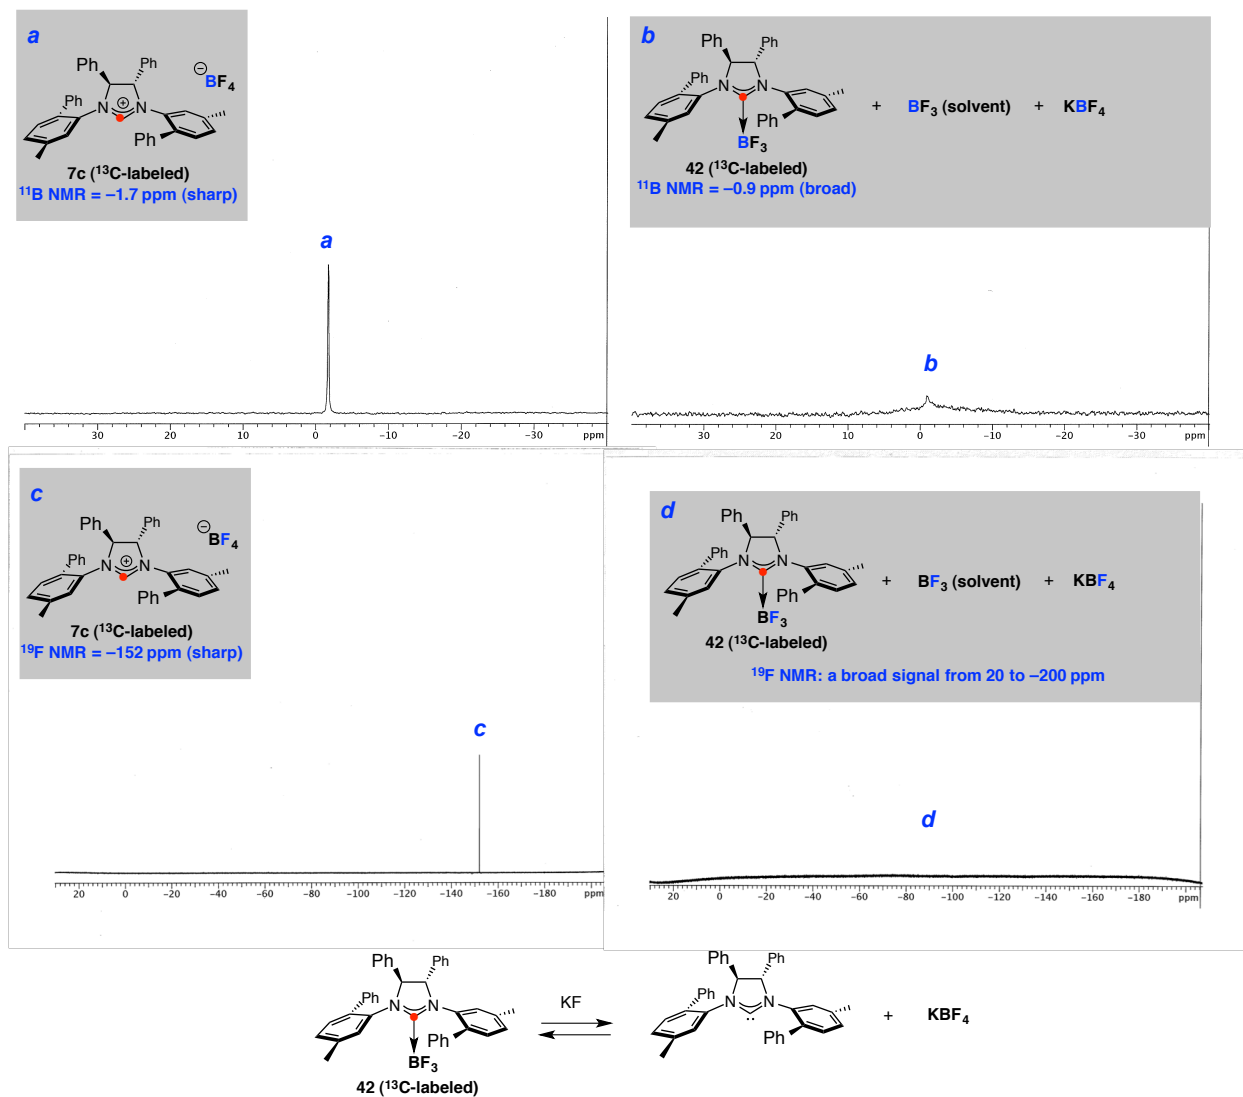

The fast equilibrium between complex 42 and NHC +  $\text{KBF}_4$  results in the broadness of signal **b** and **d**

### ■ Kinetic Studies of Chiral NHC Catalyzed BCA and SCA Reactions

$^{19}\text{F}$  NMR pre-acquisition delay technique was used to study how the concentration of each component among the starting materials influences the rates of those reactions. For the BCA reactions, *p*-fluorophenyl substituted enone (**S1**) was chosen as the substrate, while *p*-trifluoromethylphenyl substituted enone (**6c**) as the substrate for the SCA reactions, because a significant amount of the proto-deboration product was detected in BCA reactions with **6c**. In either type of reaction, the rate of the reaction was found to be first order to [enone],  $[\text{B}_2(\text{pin})_2]$  (or  $[\text{PhMe}_2\text{Si}-\text{B}(\text{pin})]$ ) and [imidazolium salt], while zero order to [dbu] (Scheme S3). The  $k_{\text{obs}}$  value was calculated for each transformation as well.

**Scheme S3.** The results of kinetic studies on NHC catalyzed BCA reactions (eq 1) and SCA reactions (eq 2)

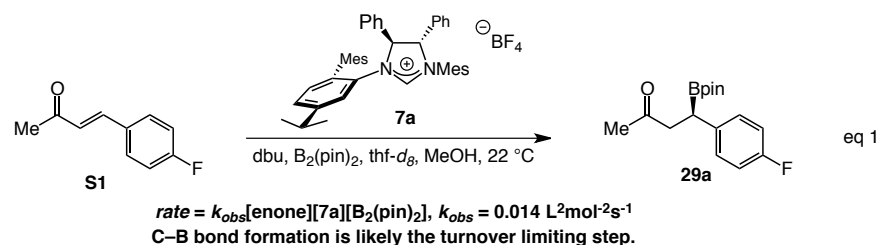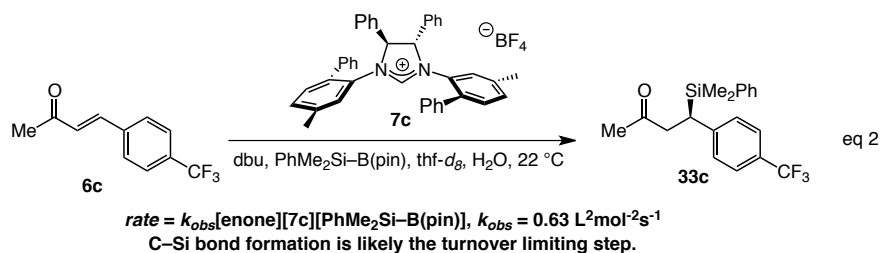

**General procedure:** In a  $N_2$  filled glove box, an oven-dried vial (8 x 1 cm) equipped with a stir bar was charged with **7a** or **7c**, dbu and thf- $d_8$  (0.60 mL). The mixture was allowed to stir for 30 min at 22 °C.  $B_2(pin)_2$  or  $PhMe_2Si-B(pin)$  was added to the vial, followed by the addition of enone **S1** or **6c**. The mixture was transferred into an oven-dried NMR tube, sealed with a cap with Teflon tape and brought out of the glove box. MeOH (0.16 mL, 4.0 mmol) or  $H_2O$  (8.6 mL, 0.048 mmol) was added to the NMR tube by syringe and the tube was inverted twice for mixing. The sample was immediately inserted into the NMR spectrometer probe and  $^{19}F$  NMR spectra were collected every 30 seconds until the reaction reached approximately 15% conversion (initial kinetics). Substrate and product concentrations were determined by  $^{19}F$  NMR analysis with the  $BF_4^-$  signal serving as the internal reference (–151 ppm). After each experiment, the conversion values ([enone] vs reaction time) were plotted and the curve was fitted with a second-order polynomial function through the use of Microsoft Excel. The initial rate of each reaction was determined as the coefficient of the term  $\alpha x^1$  ( $x$  = reaction time) of the function. By varying the concentration of one component in the reaction at a time, a series of the initial rates were obtained. Scheme S4 and S5 show the relationships between the initial rate of the reaction and the concentration of each component. Based on those results, we drew the conclusions shown in Scheme S3.

**Scheme S4.** The results of kinetic study on NHC catalyzed BCA reactions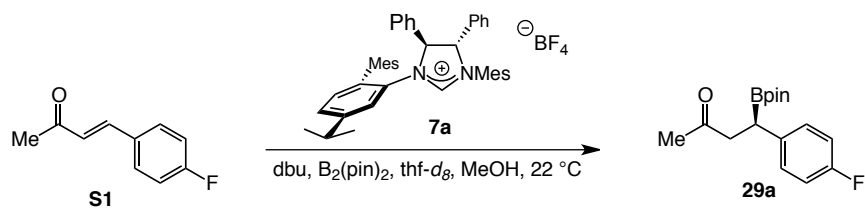

initial rate (mM/min)

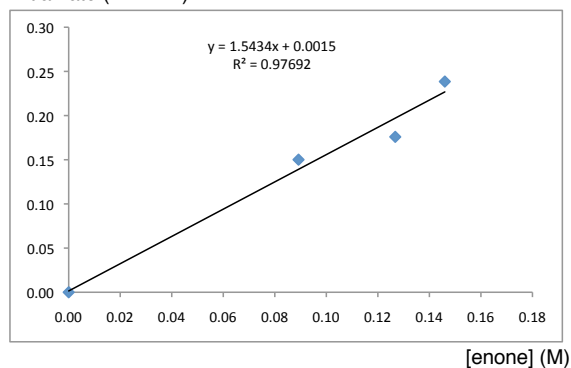

| [enone] (M) | initial rate (mM/min) |
|-------------|-----------------------|
| 0           | 0                     |
| 0.0892      | 0.150                 |
| 0.127       | 0.176                 |
| 0.146       | 0.239                 |

[**7a**] = 0.0117 M  
[ $\text{B}_2(\text{pin})_2$ ] = 0.146 M  
[dbu] = 0.293 M

initial rate (mM/min)

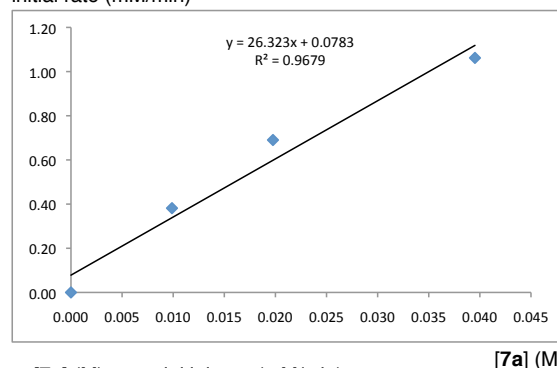

| [ <b>7a</b> ] (M) | initial rate (mM/min) |
|-------------------|-----------------------|
| 0                 | 0                     |
| 0.0099            | 0.382                 |
| 0.0198            | 0.690                 |
| 0.0395            | 1.06                  |

[enone] = 0.258 M  
[ $\text{B}_2(\text{pin})_2$ ] = 0.162 M  
[dbu] = 0.646 M

initial rate (mM/min)

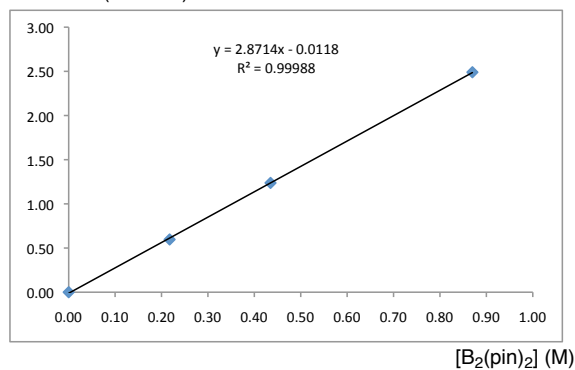

| [ $\text{B}_2(\text{pin})_2$ ] (M) | initial rate (mM/min) |
|------------------------------------|-----------------------|
| 0                                  | 0                     |
| 0.218                              | 0.597                 |
| 0.435                              | 1.24                  |
| 0.870                              | 2.49                  |

[**7a**] = 0.0129 M  
[enone] = 0.258 M  
[dbu] = 0.646 M

initial rate (mM/min)

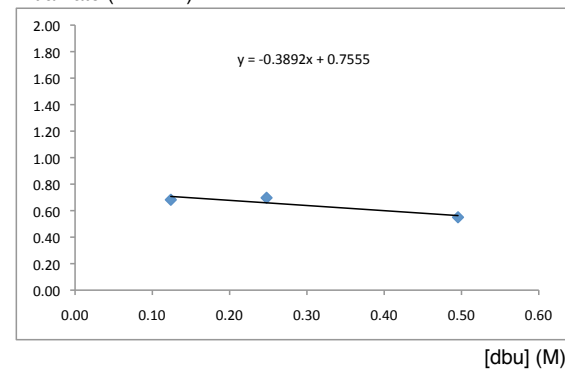

| [dbu] (M) | initial rate (mM/min) |
|-----------|-----------------------|
| 0.124     | 0.682                 |
| 0.248     | 0.697                 |
| 0.496     | 0.550                 |

[enone] = 0.129 M  
[ $\text{B}_2(\text{pin})_2$ ] = 0.646 M  
[**7a**] = 0.0129 M

**Scheme S5.** The results of kinetic study on NHC catalyzed SCA reactions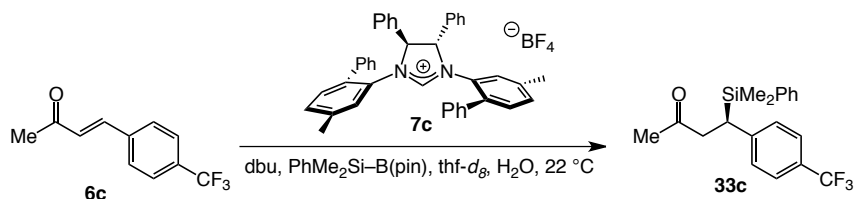

initial rate (mM/min)

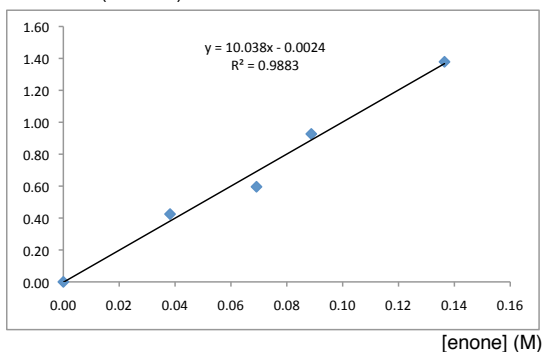

| [enone] (M) | initial rate (mM/min) |                                          |
|-------------|-----------------------|------------------------------------------|
| 0           | 0                     |                                          |
| 0.0382      | 0.425                 | [7c] = 0.00286 M                         |
| 0.0692      | 0.596                 | [PhMe <sub>2</sub> Si-B(pin)] = 0.0956 M |
| 0.0888      | 0.927                 | [dbu] = 0.191 M                          |
| 0.136       | 1.38                  |                                          |

initial rate (mM/min)

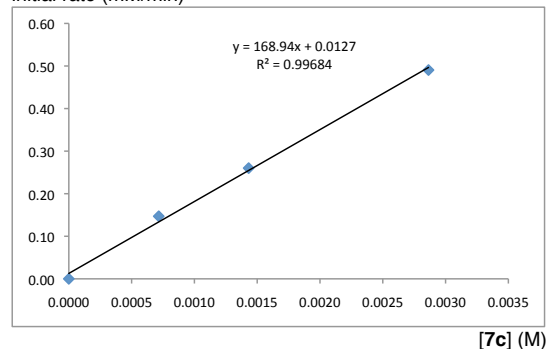

| [7c] (M) | initial rate (mM/min) |                                         |
|----------|-----------------------|-----------------------------------------|
| 0        | 0                     |                                         |
| 0.000716 | 0.147                 | [enone] = 0.0191 M                      |
| 0.00143  | 0.260                 | [PhMe <sub>2</sub> Si-B(pin)] = 0.191 M |
| 0.00286  | 0.491                 | [dbu] = 0.191 M                         |

initial rate (mM/min)

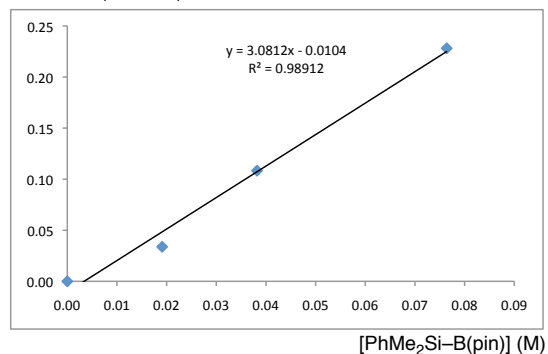

| [PhMe <sub>2</sub> Si-B(pin)] (M) | initial rate (mM/min) |                    |
|-----------------------------------|-----------------------|--------------------|
| 0                                 | 0                     |                    |
| 0.0191                            | 0.0338                | [7c] = 0.00286 M   |
| 0.0382                            | 0.108                 | [enone] = 0.0382 M |
| 0.0764                            | 0.228                 | [dbu] = 0.382 M    |

initial rate (mM/min)

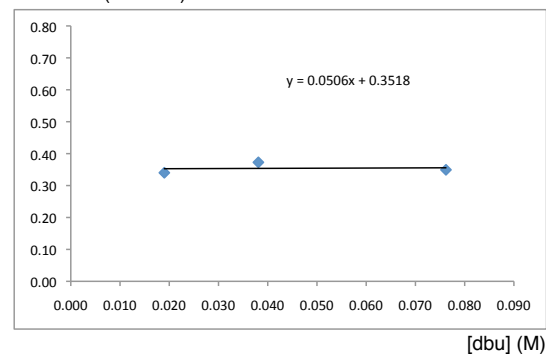

| [dbu] (M) | initial rate (mM/min) |                                         |
|-----------|-----------------------|-----------------------------------------|
| 0.0190    | 0.340                 | [enone] = 0.0191 M                      |
| 0.0381    | 0.373                 | [PhMe <sub>2</sub> Si-B(pin)] = 0.191 M |
| 0.0762    | 0.349                 | [7c] = 0.00286 M                        |

In addition to the aforementioned kinetic studies, the rate law derivation was also performed according to our proposed mechanism in a simplified model.<sup>9</sup> Here we used NHC-catalyzed boron conjugate additions as an example, and the similar rate law derivation can be performed for the corresponding SCA reactions. Based on the steady state assumption, the concentration of NHC•diboron complex does not change in the reaction mixture. Thus, the rate law can be derived as equation 6. Although further simplifications of the rate law can be performed based on additional assumptions (equations 7–10), we think the rate law of the NHC catalyzed BCA

reactions is probably close to equation 11. This is because the fast equilibrium between NHC + diboron and NHC•diboron complex (supported by previously mentioned  $^{11}\text{B}$  NMR studies) probably results in  $k_{-1} \gg k_2[\text{enone}]$  and  $k_1[\text{diboron}]$ . Thus,  $k_1[\text{diboron}] + k_{-1} + k_2[\text{enone}] \approx k_{-1}$ , leading to the simplified rate law as equation 11, which is consistent with the previously mentioned  $^{19}\text{F}$  NMR kinetic study.

**Scheme S6.** The rate law derivation of chiral NHC catalyzed BCA reactions

In a simplified model:

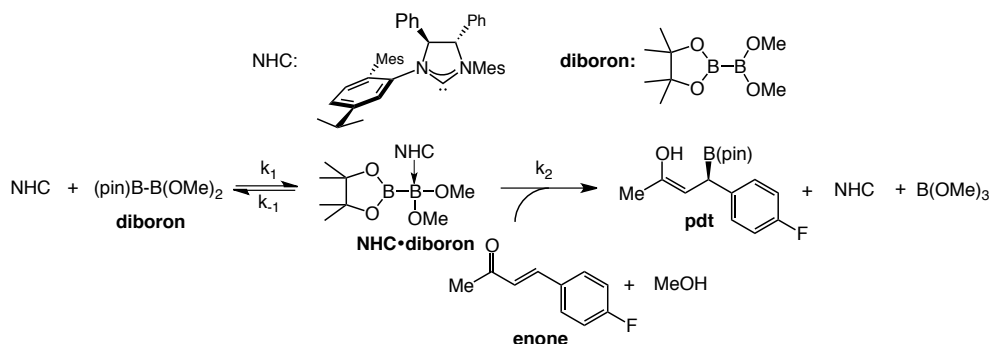

$$\text{eq 1} \quad [\text{NHC}] = [\text{NHC}]_0 - [\text{NHC}\cdot\text{diboron}] \quad [\text{NHC}]_0: \text{Initial concentration of NHC}$$

according to the steady state assumption:

$$\text{eq 2} \quad d[\text{NHC}\cdot\text{diboron}]/dt = k_1[\text{NHC}][\text{diboron}] - k_{-1}[\text{NHC}\cdot\text{diboron}] - k_2[\text{NHC}\cdot\text{diboron}][\text{enone}] = 0$$

$$\text{eq 3} \quad k_1([\text{NHC}]_0 - [\text{NHC}\cdot\text{diboron}])[\text{diboron}] - k_{-1}[\text{NHC}\cdot\text{diboron}] - k_2[\text{NHC}\cdot\text{diboron}][\text{enone}] = 0$$

$$\text{eq 4} \quad [\text{NHC}\cdot\text{diboron}] = \frac{k_1[\text{NHC}]_0[\text{diboron}]}{k_1[\text{diboron}] + k_{-1} + k_2[\text{enone}]}$$

$$\text{eq 5} \quad d[\text{pdt}]/dt = k_2[\text{NHC}\cdot\text{diboron}][\text{enone}]$$

$$\text{eq 6} \quad d[\text{pdt}]/dt = \frac{k_1 k_2 [\text{NHC}]_0 [\text{diboron}] [\text{enone}]}{k_1 [\text{diboron}] + k_{-1} + k_2 [\text{enone}]}$$

When [enone] is low, the rate law can be simplified to:

$$\text{eq 7} \quad d[\text{pdt}]/dt = \frac{k_1 k_2 [\text{NHC}]_0 [\text{diboron}] [\text{enone}]}{k_1 [\text{diboron}] + k_{-1}} \quad \text{The reaction is first order to enone.}$$

When [enone] is high, the rate law can be simplified to:

$$\text{eq 8} \quad d[\text{pdt}]/dt = \frac{k_1 k_2 [\text{NHC}]_0 [\text{diboron}] [\text{enone}]}{k_2 [\text{enone}]} = k_1 [\text{NHC}]_0 [\text{diboron}] \quad \text{The reaction is zero order to enone (saturation kinetics)}$$

When [diboron] is low:

$$\text{eq 9} \quad d[\text{pdt}]/dt = \frac{k_1 k_2 [\text{NHC}]_0 [\text{diboron}] [\text{enone}]}{k_{-1} + k_2 [\text{enone}]} \quad \text{The reaction is first order to diboron.}$$

When [diboron] is high:

$$\text{eq 10} \quad d[\text{pdt}]/dt = \frac{k_1 k_2 [\text{NHC}]_0 [\text{diboron}] [\text{enone}]}{k_1 [\text{diboron}]} = k_2 [\text{NHC}]_0 [\text{enone}] \quad \text{The reaction is zero order to diboron (saturation kinetics)}$$

In our case, it is probably  $k_1[\text{diboron}] + k_{-1} + k_2[\text{enone}] \approx k_{-1}$ , because of fast and reversible coordination of NHC to diboron. Thus, the rate law can be simplified to:

$$\text{eq 11} \quad \frac{d[\text{pdt}]/dt}{dt} = \frac{k_1 k_2 [\text{NHC}]_0 [\text{diboron}] [\text{enone}]}{k_{-1}}$$

The reaction is first order to NHC, diboron and enone.

## ■ Calculations on BDE for B–B Bonds in $\text{B}_2(\text{pin})_2$ and $\text{NHC} \cdot \text{B}_2(\text{pin})_2$

Density Functional Theory (DFT) calculations were carried out in an effort to estimate the homolytic bond dissociation energy (BDE) for B–B bonds in  $\text{B}_2(\text{pin})_2$  and  $\text{NHC} \cdot \text{B}_2(\text{pin})_2$ . The B97-D functional and 6-31G\* basis set were employed for geometry optimizations and frequency calculations. As shown in Scheme S7, the enthalpy change to break the B–B bond homolytically in  $\text{B}_2(\text{pin})_2$  is 104 kcal/mol, while the one required to break the B–B bond in  $\text{NHC} \cdot \text{diboron}$  is 63 kcal/mol. These calculations suggest that a significant weakening of the B–B bond in  $\text{B}_2(\text{pin})_2$  occurs upon NHC coordination.

**Scheme S7.** Calculated BDE for B–B Bonds in  $\text{B}_2(\text{pin})_2$  and  $\text{NHC} \cdot \text{B}_2(\text{pin})_2$

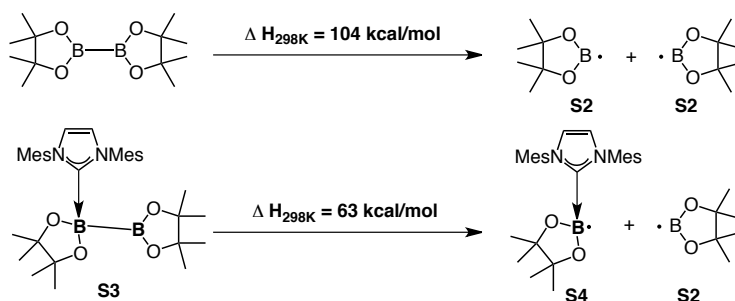

### 1. $\text{B}_2(\text{pin})_2$

-----  
 Cartesian coordinates (Angstroms):  
 -----

42

|   |        |        |        |
|---|--------|--------|--------|
| H | 2.854  | -1.219 | -0.824 |
| H | 1.357  | -1.022 | -1.777 |
| H | 2.853  | -1.596 | -2.573 |
| C | 2.259  | -1.637 | -1.648 |
| H | -2.396 | -0.296 | 3.377  |
| H | -3.075 | -0.372 | 1.176  |
| H | 0.698  | -2.077 | -3.722 |
| H | -4.557 | -0.553 | 2.161  |
| C | -3.946 | -1.014 | 1.371  |
| C | -2.489 | -1.258 | 3.896  |
| H | -1.678 | -1.338 | 4.634  |
| H | -4.545 | -1.084 | 0.453  |
| H | -3.452 | -1.284 | 4.430  |
| H | 3.827  | -3.427 | -0.414 |
| C | 1.885  | -3.088 | -1.299 |
| O | -1.154 | -2.319 | 2.152  |
| O | 1.164  | -3.039 | -0.021 |
| C | 0.845  | -3.164 | -3.703 |
| H | 1.813  | -3.402 | -4.171 |
| B | -0.192 | -3.045 | -0.309 |

```

C    3.150   -3.931   -1.118
B   -1.413   -2.771    0.867
H    3.669   -4.044   -2.082
C   -2.403   -2.430    2.916
C   -3.497   -2.428    1.778
C    0.808   -3.706   -2.272
O   -0.456   -3.298   -1.645
H    0.046   -3.636   -4.293
O   -2.763   -2.980    0.633
H    2.913   -4.926   -0.723
H   -1.430   -3.759    4.312
H   -5.244   -2.952    2.953
C   -2.331   -3.762    3.684
C   -4.717   -3.310    2.055
H   -5.407   -3.258    1.202
C    0.813   -5.245   -2.288
H   -3.214   -3.892    4.326
H    1.709   -5.629   -2.797
H   -2.272   -4.609    2.986
H    0.787   -5.643   -1.264
H   -0.079   -5.594   -2.825
H   -4.427   -4.357    2.207

```

```

                1                2                3
                A                A                A
Frequencies --   21.6143          37.2646          56.3220
Red. masses  --    3.4904          3.6209          4.2094
Zero-point correction=
Thermal correction to Energy=
Thermal correction to Enthalpy=
Thermal correction to Gibbs Free Energy=
Sum of electronic and zero-point Energies=
Sum of electronic and thermal Energies=
Sum of electronic and thermal Enthalpies=
Sum of electronic and thermal Free Energies=

```

```

Item              Value      Threshold  Converged?
Maximum Force     0.000095   0.000450   YES
RMS Force        0.000013   0.000300   YES

```

## 2. (pin)B• radical (S2)

```

-----
Cartesian coordinates (Angstroms):
-----

```

21

```

H    7.883    0.033    4.666
H    7.162   -0.990    6.604
H    8.715   -0.204    7.014
C    8.172   -1.160    7.001
H    8.719   -0.339    3.136
C    8.773   -0.435    4.229
H    8.087   -1.534    8.031
H    9.668    0.100    4.583
O    7.599   -2.584    4.200
B    7.355   -3.524    5.162

```

|   |        |        |       |
|---|--------|--------|-------|
| C | 8.871  | -1.913 | 4.606 |
| C | 8.923  | -2.200 | 6.159 |
| O | 8.151  | -3.476 | 6.273 |
| H | 9.777  | -2.515 | 2.745 |
| C | 9.996  | -2.598 | 3.818 |
| C | 10.324 | -2.439 | 6.721 |
| H | 10.939 | -1.535 | 6.585 |
| H | 10.255 | -2.654 | 7.796 |
| H | 10.963 | -2.116 | 4.021 |
| H | 10.067 | -3.662 | 4.082 |
| H | 10.818 | -3.283 | 6.225 |

|                                              | 1       | 2        | 3                           |
|----------------------------------------------|---------|----------|-----------------------------|
|                                              | A       | A        | A                           |
| Frequencies --                               | 99.0141 | 218.6294 | 231.3430                    |
| Red. masses --                               | 3.5799  | 1.2073   | 1.1507                      |
| Zero-point correction=                       |         |          | 0.174434 (Hartree/Particle) |
| Thermal correction to Energy=                |         |          | 0.184103                    |
| Thermal correction to Enthalpy=              |         |          | 0.185047                    |
| Thermal correction to Gibbs Free Energy=     |         |          | 0.140664                    |
| Sum of electronic and zero-point Energies=   |         |          | -410.763313                 |
| Sum of electronic and thermal Energies=      |         |          | -410.753643                 |
| Sum of electronic and thermal Enthalpies=    |         |          | -410.752699                 |
| Sum of electronic and thermal Free Energies= |         |          | -410.797082                 |

| Item          | Value    | Threshold | Converged? |
|---------------|----------|-----------|------------|
| Maximum Force | 0.000042 | 0.000450  | YES        |
| RMS Force     | 0.000012 | 0.000300  | YES        |

### 3. NHC•B<sub>2</sub>(pin)<sub>2</sub>(S3)

Cartesian coordinates (Angstroms):

57

|   |        |        |       |
|---|--------|--------|-------|
| N | 3.932  | -3.875 | 3.718 |
| B | 6.204  | -4.877 | 4.942 |
| C | 3.526  | -3.479 | 2.449 |
| C | 5.184  | -4.414 | 3.682 |
| C | 4.555  | -3.780 | 1.599 |
| N | 5.554  | -4.354 | 2.372 |
| H | 8.008  | -1.489 | 7.984 |
| H | 7.104  | -0.996 | 6.526 |
| H | 10.233 | -2.518 | 7.812 |
| C | 8.109  | -1.127 | 6.952 |
| H | 8.621  | -0.153 | 6.964 |
| O | 8.196  | -3.436 | 6.261 |
| C | 8.908  | -2.165 | 6.142 |
| C | 10.311 | -2.326 | 6.733 |
| H | 10.896 | -1.405 | 6.583 |
| H | 10.843 | -3.166 | 6.268 |
| H | 7.868  | 0.040  | 4.597 |
| H | 9.653  | 0.124  | 4.558 |
| C | 8.868  | -1.900 | 4.591 |
| C | 8.774  | -0.426 | 4.189 |
| H | 10.984 | -2.093 | 4.049 |
| H | 8.747  | -0.343 | 3.093 |



|   |        |        |       |
|---|--------|--------|-------|
| C | 10.022 | -2.583 | 3.834 |
| H | 10.092 | -3.643 | 4.116 |
| H | 9.827  | -2.515 | 2.754 |
| B | 7.371  | -3.582 | 5.148 |
| O | 7.637  | -2.586 | 4.192 |
| H | 2.553  | -3.039 | 2.268 |
| H | 4.660  | -3.652 | 0.529 |
| H | 4.252  | -6.646 | 8.151 |
| C | 4.518  | -7.186 | 7.229 |
| H | 6.542  | -5.744 | 8.428 |
| H | 3.652  | -7.171 | 6.553 |
| O | 5.376  | -5.205 | 6.137 |
| H | 4.744  | -8.232 | 7.494 |
| C | 5.740  | -6.523 | 6.579 |
| C | 6.880  | -6.400 | 7.613 |
| H | 7.149  | -7.381 | 8.033 |
| H | 7.764  | -5.945 | 7.147 |
| H | 4.293  | -6.874 | 4.265 |
| C | 6.222  | -7.211 | 5.247 |
| C | 5.036  | -7.677 | 4.370 |
| O | 6.916  | -6.142 | 4.584 |
| H | 4.538  | -8.560 | 4.800 |
| C | 7.196  | -8.379 | 5.452 |
| H | 6.730  | -9.163 | 6.070 |
| H | 5.419  | -7.939 | 3.373 |
| H | 8.115  | -8.035 | 5.942 |
| H | 7.462  | -8.817 | 4.477 |
| C | 3.113  | -3.695 | 4.926 |
| C | 6.879  | -4.738 | 1.863 |
| H | 7.227  | -5.603 | 2.436 |
| H | 7.571  | -3.899 | 2.007 |
| H | 6.782  | -4.986 | 0.798 |
| H | 3.008  | -2.620 | 5.136 |
| H | 3.620  | -4.206 | 5.752 |
| H | 2.121  | -4.134 | 4.753 |

|                                              | 1       | 2       | 3                           |
|----------------------------------------------|---------|---------|-----------------------------|
|                                              | A       | A       | A                           |
| Frequencies --                               | 13.1324 | 28.0149 | 41.4303                     |
| Red. masses --                               | 3.6689  | 4.1722  | 3.6310                      |
| Zero-point correction=                       |         |         | 0.478619 (Hartree/Particle) |
| Thermal correction to Energy=                |         |         | 0.506874                    |
| Thermal correction to Enthalpy=              |         |         | 0.507818                    |
| Thermal correction to Gibbs Free Energy=     |         |         | 0.421531                    |
| Sum of electronic and zero-point Energies=   |         |         | -1126.198115                |
| Sum of electronic and thermal Energies=      |         |         | -1126.169860                |
| Sum of electronic and thermal Enthalpies=    |         |         | -1126.168916                |
| Sum of electronic and thermal Free Energies= |         |         | -1126.255203                |

| Item          | Value    | Threshold | Converged? |
|---------------|----------|-----------|------------|
| Maximum Force | 0.000014 | 0.000450  | YES        |
| RMS Force     | 0.000002 | 0.000300  | YES        |

---

#### 4. NHC•B(pin) radical (S4)

---

Cartesian coordinates (Angstroms):

36

```

-----
N      3.956    -3.438    3.720
B      5.314    -5.547    4.503
C      3.952    -2.595    2.612
C      4.944    -4.436    3.547
C      4.871    -3.061    1.717
N      5.510    -4.161    2.280
H      3.294    -1.735    2.561
H      5.127    -2.708    0.724
H      3.963    -7.175    7.987
C      4.510    -7.738    7.217
H      5.622    -5.354    8.038
H      3.780    -8.222    6.555
O      4.594    -5.857    5.679
H      5.112    -8.514    7.714
C      5.420    -6.788    6.434
C      6.284    -5.959    7.403
H      6.897    -6.608    8.046
H      6.948    -5.285    6.842
H      4.512    -8.291    4.298
C      6.272    -7.479    5.299
C      5.513    -8.626    4.605
O      6.424    -6.404    4.329
H      5.410    -9.494    5.272
C      7.660    -7.950    5.738
H      7.571    -8.708    6.532
H      6.075    -8.930    3.711
H      8.264    -7.113    6.110
H      8.181    -8.404    4.882
C      3.402    -3.073    5.014
C      6.282    -5.127    1.514
H      5.637    -5.944    1.138
H      7.059    -5.565    2.151
H      6.746    -4.610    0.663
H      2.543    -2.407    4.853
H      4.156    -2.554    5.636
H      3.078    -3.976    5.543

```

```

              1              2              3
              A              A              A
Frequencies --   39.9707         49.5078         68.2978
Red. masses  --    3.1681         3.5434         2.7894
Zero-point correction=
Thermal correction to Energy=
Thermal correction to Enthalpy=
Thermal correction to Gibbs Free Energy=
Sum of electronic and zero-point Energies=
Sum of electronic and thermal Energies=
Sum of electronic and thermal Enthalpies=
Sum of electronic and thermal Free Energies=

```

```

-----
Item              Value      Threshold  Converged?
Maximum Force    0.000024    0.000450    YES
RMS Force       0.000005    0.000300    YES
-----

```

## ■ Calculations on Stereochemical Models for BCA and SCA Reactions

Density Functional Theory (DFT) calculations were carried out in an effort to gain more insight into the mechanism of the aforementioned NHC-catalyzed conjugate addition reactions of a B(pin) or SiPhMe<sub>2</sub> unit to acyclic and cyclic  $\alpha,\beta$ -unsaturated carbonyl compounds. We have previously demonstrated that the B–B bond (or B–Si bond) upon coordination of a Lewis basic NHC becomes polarized (activated), whereupon the resulting nucleophilic B(pin) (or SiPhMe<sub>2</sub>) unit of the complex readily attacks the electrophilic enone. The forming of the C–B (or C–Si) bond is, according to our kinetic studies, likely to be the turnover limiting step. Since it involves the enantioselective transfer of the B(pin) or SiPhMe<sub>2</sub> unit to the  $\alpha,\beta$ -unsaturated carbonyl, we believe this is also the stereochemical determining step. Consequently, we decided to focus our DFT studies on this step with the intention to further understand how these catalytic reactions operate and the origin of enantioselectivity. All ground state and transition state geometries were optimized using DFT methodology. The B97-D functional and 6-31G\* basis set were employed. Tetrahydrofuran solvation (or tetrahydrofuran/MeOH in boryl conjugate additions catalyzed by a chiral NHC) was modeled using the PCM model. Frequency calculations were carried out on all optimized geometries at the same level of theory to determine the whether these are minima or first-order saddle-points on the potential energy surface.

Our computational investigations began with a non-enantioselective reaction, where the boron conjugate addition to cyclohexenone is catalyzed by a small achiral NHC derived from 1,3-dicyclohexylimidazolium salt (**3a**). The transition state of the B(pin) transfer step is depicted as **A** (Scheme S8). The calculations show that the B(pin) transfer occurs in a concerted manner, that is, as the B–B bond breaks the C–B bond forms simultaneously. At the transition state, the distance between the two boron atoms is 2.05 Å, and the distance between the  $\beta$  carbon of cyclohexenone and the boron is 1.96 Å. The intrinsic free energy of activation  $\Delta G^\ddagger$  is 18.0 kcal/mol.

**Scheme S8.** The transition state of the C–B bond formation in an achiral NHC catalyzed BCA reaction

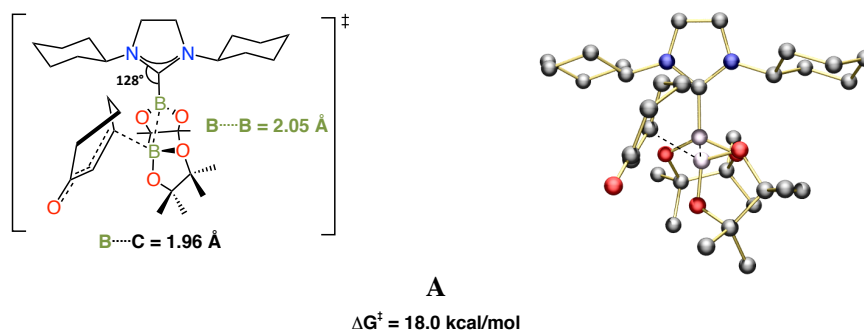

### Ground State of A

-----  
Cartesian coordinates (Angstroms):  
-----

98

H     -4.036     0.114     -3.129

|   |        |        |        |
|---|--------|--------|--------|
| C | -3.888 | 0.792  | -2.285 |
| H | -2.484 | -0.457 | -1.317 |
| O | -5.353 | 2.371  | -3.285 |
| C | -3.041 | 0.481  | -1.272 |
| C | -4.616 | 2.077  | -2.337 |
| C | -2.819 | 1.377  | -0.080 |
| H | -1.893 | 1.960  | -0.240 |
| C | -4.361 | 3.055  | -1.182 |
| H | -3.512 | 3.696  | -1.487 |
| C | -4.005 | 2.336  | 0.135  |
| H | -5.239 | 3.710  | -1.079 |
| H | -4.877 | 1.754  | 0.478  |
| H | -3.768 | 3.070  | 0.920  |
| H | -2.628 | 0.765  | 0.814  |
| N | 0.446  | 1.293  | -1.163 |
| B | 0.030  | -1.320 | -0.336 |
| C | 0.926  | 2.482  | -0.624 |
| C | 0.509  | 0.288  | -0.237 |
| C | 1.276  | 2.217  | 0.669  |
| N | 1.005  | 0.875  | 0.889  |
| H | -4.932 | -2.170 | 0.010  |
| H | -4.269 | -0.748 | 0.859  |
| H | -4.305 | -4.452 | 0.662  |
| C | -4.553 | -1.803 | 0.975  |
| H | -5.358 | -1.871 | 1.723  |
| O | -2.365 | -2.585 | 0.307  |
| C | -3.344 | -2.656 | 1.393  |
| C | -3.772 | -4.117 | 1.565  |
| H | -4.451 | -4.217 | 2.426  |
| H | -2.903 | -4.771 | 1.721  |
| H | -3.881 | -0.394 | 3.089  |
| H | -4.148 | -1.868 | 4.063  |
| C | -2.546 | -2.054 | 2.610  |
| C | -3.382 | -1.232 | 3.593  |
| H | -2.363 | -3.803 | 3.919  |
| H | -2.731 | -0.830 | 4.384  |
| C | -1.715 | -3.107 | 3.364  |
| H | -1.095 | -3.679 | 2.659  |
| H | -1.053 | -2.594 | 4.077  |
| B | -1.387 | -1.649 | 0.644  |
| O | -1.586 | -1.169 | 1.947  |
| H | 0.971  | 3.399  | -1.196 |
| H | 1.688  | 2.855  | 1.440  |
| H | 0.474  | -2.994 | -4.097 |
| C | 1.295  | -2.959 | -3.363 |
| H | -1.080 | -4.009 | -2.443 |
| H | 1.913  | -2.077 | -3.577 |
| O | -0.033 | -1.704 | -1.773 |
| H | 1.914  | -3.862 | -3.496 |
| C | 0.716  | -2.915 | -1.942 |
| C | -0.233 | -4.118 | -1.748 |
| H | 0.275  | -5.074 | -1.955 |
| H | -0.628 | -4.129 | -0.724 |
| H | 2.632  | -0.933 | -1.494 |
| C | 1.798  | -2.828 | -0.798 |
| C | 2.990  | -1.922 | -1.177 |
| O | 1.076  | -2.216 | 0.277  |
| H | 3.597  | -2.357 | -1.987 |

|   |        |        |        |
|---|--------|--------|--------|
| C | 2.328  | -4.188 | -0.322 |
| H | 2.814  | -4.728 | -1.152 |
| H | 3.631  | -1.791 | -0.291 |
| H | 1.512  | -4.809 | 0.076  |
| H | 3.072  | -4.038 | 0.476  |
| C | 0.659  | 0.635  | -4.938 |
| C | -0.186 | 1.823  | -5.441 |
| C | 1.173  | 0.879  | -3.505 |
| H | 1.510  | 0.452  | -5.614 |
| H | 0.040  | -0.279 | -4.937 |
| C | -0.015 | 1.153  | -2.566 |
| H | 1.855  | 1.747  | -3.487 |
| H | 1.717  | 0.001  | -3.137 |
| C | -0.807 | 2.385  | -3.041 |
| C | -1.341 | 2.130  | -4.465 |
| H | -0.148 | 3.269  | -3.063 |
| H | -1.634 | 2.596  | -2.349 |
| H | 0.459  | 2.716  | -5.526 |
| H | -0.585 | 1.610  | -6.446 |
| H | -1.917 | 3.005  | -4.806 |
| H | -2.037 | 1.274  | -4.435 |
| C | 0.779  | 0.147  | 4.646  |
| C | 2.286  | -0.022 | 4.930  |
| C | 0.541  | 0.915  | 3.330  |
| H | 0.284  | 0.671  | 5.480  |
| H | 0.311  | -0.849 | 4.560  |
| C | 1.254  | 0.190  | 2.177  |
| H | 0.936  | 1.941  | 3.430  |
| H | -0.532 | 0.975  | 3.101  |
| C | 2.765  | 0.044  | 2.430  |
| H | 0.825  | -0.808 | 2.078  |
| C | 2.995  | -0.719 | 3.750  |
| H | 3.228  | 1.045  | 2.491  |
| H | 3.216  | -0.493 | 1.583  |
| H | 2.737  | 0.975  | 5.084  |
| H | 2.436  | -0.597 | 5.858  |
| H | 4.075  | -0.811 | 3.947  |
| H | 2.594  | -1.743 | 3.640  |
| H | -0.666 | 0.275  | -2.576 |

|                                              | 1       | 2       | 3                           |
|----------------------------------------------|---------|---------|-----------------------------|
|                                              | A       | A       | A                           |
| Frequencies --                               | 13.1939 | 20.1958 | 27.1962                     |
| Red. masses --                               | 5.4714  | 6.9319  | 4.3492                      |
| Zero-point correction=                       |         |         | 0.849032 (Hartree/Particle) |
| Thermal correction to Energy=                |         |         | 0.893423                    |
| Thermal correction to Enthalpy=              |         |         | 0.894367                    |
| Thermal correction to Gibbs Free Energy=     |         |         | 0.773357                    |
| Sum of electronic and zero-point Energies=   |         |         | -1824.698238                |
| Sum of electronic and thermal Energies=      |         |         | -1824.653847                |
| Sum of electronic and thermal Enthalpies=    |         |         | -1824.652903                |
| Sum of electronic and thermal Free Energies= |         |         | -1824.773914                |

|         | Item  | Value    | Threshold | Converged? |
|---------|-------|----------|-----------|------------|
| Maximum | Force | 0.000019 | 0.000450  | YES        |
| RMS     | Force | 0.000003 | 0.000300  | YES        |

-----

**Transition State of A**-----  
Cartesian coordinates (Angstroms):  
-----

98

|   |        |        |        |
|---|--------|--------|--------|
| N | 0.832  | 1.315  | -1.396 |
| B | -0.064 | -1.069 | -0.525 |
| C | 1.472  | 2.434  | -0.885 |
| C | 0.622  | 0.399  | -0.406 |
| C | 1.652  | 2.214  | 0.451  |
| N | 1.118  | 0.966  | 0.730  |
| C | -2.512 | 0.470  | -0.728 |
| H | -5.004 | -3.079 | 0.342  |
| H | -4.854 | -1.494 | 1.131  |
| H | -3.333 | -4.797 | 0.533  |
| C | -4.615 | -2.558 | 1.230  |
| H | -5.122 | -2.958 | 2.121  |
| O | -2.497 | -2.284 | 0.099  |
| C | -3.098 | -2.796 | 1.317  |
| C | -2.828 | -4.306 | 1.379  |
| H | -3.225 | -4.732 | 2.315  |
| H | -1.753 | -4.523 | 1.319  |
| H | -4.134 | -0.867 | 3.188  |
| H | -3.730 | -2.336 | 4.125  |
| C | -2.385 | -1.953 | 2.456  |
| C | -3.309 | -1.475 | 3.581  |
| H | -1.461 | -3.575 | 3.594  |
| H | -2.730 | -0.866 | 4.293  |
| C | -1.158 | -2.666 | 3.051  |
| H | -0.448 | -2.929 | 2.258  |
| H | -0.657 | -1.992 | 3.760  |
| B | -1.906 | -1.036 | 0.362  |
| O | -1.899 | -0.774 | 1.744  |
| C | -4.602 | 2.022  | 0.741  |
| O | -6.154 | 0.414  | -0.183 |
| C | -4.952 | 0.773  | -0.087 |
| C | -3.893 | 0.126  | -0.810 |
| C | -2.194 | 1.799  | -0.026 |
| H | -4.186 | -0.724 | -1.428 |
| C | -3.125 | 2.079  | 1.166  |
| H | -2.888 | 3.065  | 1.599  |
| H | -2.936 | 1.321  | 1.939  |
| H | -5.277 | 2.060  | 1.612  |
| H | -4.845 | 2.903  | 0.116  |
| H | -1.942 | 0.306  | -1.648 |
| H | -1.154 | 1.839  | 0.314  |
| H | -2.310 | 2.604  | -0.775 |
| H | 1.742  | 3.275  | -1.509 |
| H | 2.103  | 2.831  | 1.217  |
| H | 0.551  | -2.828 | -4.127 |
| C | 1.221  | -2.947 | -3.262 |
| H | -1.386 | -3.630 | -2.910 |
| H | 1.985  | -2.158 | -3.303 |
| O | -0.167 | -1.536 | -1.880 |
| H | 1.719  | -3.927 | -3.341 |
| C | 0.396  | -2.869 | -1.968 |
| C | -0.754 | -3.885 | -2.045 |

|   |        |        |        |
|---|--------|--------|--------|
| H | -0.364 | -4.906 | -2.185 |
| H | -1.370 | -3.842 | -1.141 |
| H | 2.690  | -1.450 | -1.244 |
| C | 1.255  | -2.983 | -0.641 |
| C | 2.696  | -2.464 | -0.816 |
| O | 0.591  | -2.077 | 0.274  |
| H | 3.285  | -3.121 | -1.474 |
| C | 1.278  | -4.381 | -0.017 |
| H | 1.744  | -5.102 | -0.707 |
| H | 3.181  | -2.424 | 0.171  |
| H | 0.262  | -4.723 | 0.219  |
| H | 1.868  | -4.358 | 0.913  |
| C | 1.422  | 0.717  | -5.136 |
| C | 0.581  | 1.887  | -5.688 |
| C | 1.786  | 0.947  | -3.655 |
| H | 2.340  | 0.586  | -5.730 |
| H | 0.842  | -0.219 | -5.218 |
| C | 0.502  | 1.159  | -2.832 |
| H | 2.433  | 1.836  | -3.563 |
| H | 2.337  | 0.085  | -3.248 |
| C | -0.319 | 2.352  | -3.352 |
| C | -0.682 | 2.115  | -4.833 |
| H | 0.271  | 3.281  | -3.266 |
| H | -1.225 | 2.470  | -2.739 |
| H | 1.193  | 2.807  | -5.679 |
| H | 0.300  | 1.692  | -6.736 |
| H | -1.258 | 2.974  | -5.215 |
| H | -1.335 | 1.227  | -4.902 |
| C | 0.318  | 0.811  | 4.483  |
| C | 1.710  | 0.363  | 4.972  |
| C | 0.382  | 1.393  | 3.057  |
| H | -0.106 | 1.565  | 5.166  |
| H | -0.369 | -0.050 | 4.488  |
| C | 1.048  | 0.390  | 2.094  |
| H | 0.965  | 2.329  | 3.081  |
| H | -0.627 | 1.625  | 2.686  |
| C | 2.445  | -0.039 | 2.569  |
| H | 0.407  | -0.489 | 2.017  |
| C | 2.351  | -0.637 | 3.988  |
| H | 3.116  | 0.837  | 2.579  |
| H | 2.853  | -0.773 | 1.858  |
| H | 2.364  | 1.249  | 5.060  |
| H | 1.633  | -0.087 | 5.976  |
| H | 3.355  | -0.930 | 4.335  |
| H | 1.739  | -1.555 | 3.948  |
| H | -0.100 | 0.250  | -2.900 |

|                                            | 1         | 2       | 3                           |
|--------------------------------------------|-----------|---------|-----------------------------|
|                                            | A         | A       | A                           |
| Frequencies --                             | -342.3384 | 16.5905 | 25.4934                     |
| Red. masses --                             | 9.7213    | 4.9027  | 4.2430                      |
| Zero-point correction=                     |           |         | 0.848393 (Hartree/Particle) |
| Thermal correction to Energy=              |           |         | 0.891892                    |
| Thermal correction to Enthalpy=            |           |         | 0.892836                    |
| Thermal correction to Gibbs Free Energy=   |           |         | 0.775068                    |
| Sum of electronic and zero-point Energies= |           |         | -1824.671940                |
| Sum of electronic and thermal Energies=    |           |         | -1824.628442                |
| Sum of electronic and thermal Enthalpies=  |           |         | -1824.627497                |

Sum of electronic and thermal Free Energies= -1824.745265

|         | Item  | Value    | Threshold | Converged? |
|---------|-------|----------|-----------|------------|
| Maximum | Force | 0.000009 | 0.000450  | YES        |
| RMS     | Force | 0.000001 | 0.000300  | YES        |

Next, we investigated the enantioselective boryl conjugate addition to acyclic enones. Additional noteworthy points merit mention: 1) Boryl conjugate additions catalyzed by chiral NHCs only proceed in the presence of MeOH. Experiments indicate that MeOH may play a dual role in the reaction by acting as a proton source and promoting hydrolysis of one of the pinacolato groups in  $B_2(\text{pin})_2$ . Our computational studies suggest that this hydrolysis eases the coordination of the bulky, chiral NHC to the boron center. 2) Excess dbu was used instead of catalytic  $\text{NaOt-Bu}$ . Besides deprotonation of the imidazolium salt to generate the NHC, we speculate that the protonated form of dbu ( $\text{dbuH}^+$ ) may serve as a Lewis acid to activate the carbonyl group of the enone. Two transition states (**I** and **II**) for the addition of B(pin) unit to the acyclic enone that results in the two observed enantiomeric products were optimized (Scheme S9). In the favored transition state **I**, the distance between the two borons is 2.22 Å and the one between the  $\beta$  carbon of the enone and the boron is 2.12 Å. The activation energy of **I** ( $\Delta G^\ddagger = 25.8$  kcal/mol) is higher than the transition state **A** that involves an achiral NHC ( $\Delta G^\ddagger = 18.0$  kcal/mol). One of the many reasons could be that the more sterically hindered chiral NHC hampers formation of the C–B bond, compared to the small achiral NHC. The unfavored transition state **II** is 1.4 kcal/mol higher in energy than **I**, probably because of the steric repulsion between the phenyl substituent of the enone and the N-aryl motif of the NHC (highlighted in **II**). Such interactions may also lead to the variation of the N–C–B angle from 123° to 133° in TS **I** and **II**, respectively.



**Scheme S9.** The transition state of the C–B bond formation in an achiral NHC catalyzed BCA reaction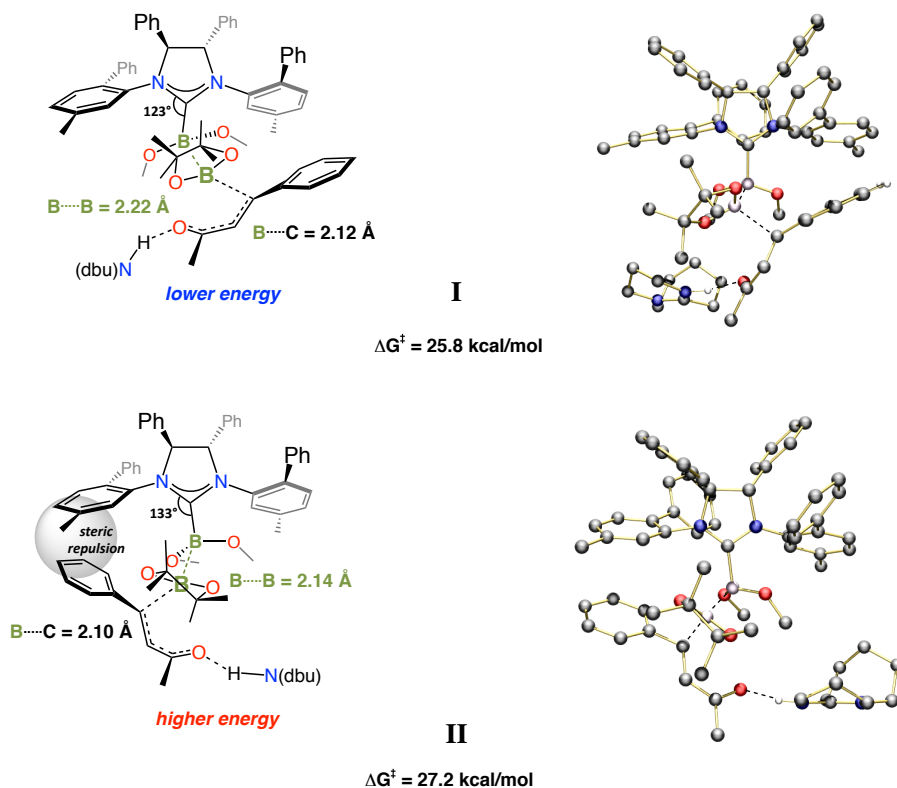

### Ground State of I and II

-----  
 Cartesian coordinates (Angstroms):  
 -----

158

|   |        |       |        |
|---|--------|-------|--------|
| H | 7.209  | 5.333 | -5.950 |
| H | 8.733  | 6.239 | -7.090 |
| C | 7.509  | 5.588 | -4.924 |
| H | 6.713  | 7.538 | -5.479 |
| H | 6.840  | 5.032 | -4.258 |
| C | 9.643  | 6.515 | -6.542 |
| C | 7.356  | 7.132 | -4.685 |
| H | 10.476 | 6.473 | -7.255 |
| H | 9.031  | 8.567 | -6.684 |
| C | 8.912  | 5.059 | -4.721 |
| N | 9.902  | 5.482 | -5.516 |
| H | 8.308  | 3.877 | -3.184 |
| C | 9.502  | 7.923 | -5.924 |
| H | 6.825  | 7.277 | -3.733 |
| N | 9.128  | 4.186 | -3.742 |
| H | 11.556 | 4.264 | -5.985 |
| C | 8.673  | 7.934 | -4.622 |
| H | 10.577 | 2.677 | -3.990 |
| C | 11.311 | 5.077 | -5.284 |
| C | 10.449 | 3.621 | -3.438 |
| H | 8.438  | 8.976 | -4.357 |
| H | 10.501 | 8.338 | -5.716 |

|   |        |        |        |
|---|--------|--------|--------|
| H | 11.941 | 5.944  | -5.525 |
| H | 9.292  | 7.537  | -3.800 |
| C | 11.525 | 4.639  | -3.831 |
| H | 10.473 | 3.397  | -2.364 |
| H | 12.523 | 4.195  | -3.728 |
| H | 11.460 | 5.514  | -3.167 |
| C | 4.979  | 2.299  | -0.420 |
| B | 6.664  | -0.247 | -3.945 |
| O | 7.395  | 0.010  | -5.107 |
| B | 7.338  | -0.993 | -2.491 |
| C | 7.375  | -2.664 | -2.813 |
| N | 8.238  | -3.309 | -3.637 |
| N | 6.413  | -3.535 | -2.438 |
| H | 10.056 | 0.935  | -1.953 |
| O | 8.734  | -0.604 | -2.219 |
| H | 8.173  | -7.583 | 1.739  |
| H | 8.967  | -5.276 | 1.187  |
| C | 7.498  | -6.869 | 1.264  |
| C | 7.944  | -5.574 | 0.950  |
| H | 5.820  | -8.243 | 1.193  |
| C | 6.177  | -7.238 | 0.959  |
| C | 7.083  | -4.658 | 0.330  |
| H | 7.437  | -3.657 | 0.091  |
| H | 6.216  | -1.851 | 0.309  |
| H | 12.676 | -0.732 | -2.076 |
| H | 3.198  | -4.541 | 0.701  |
| H | 13.819 | -1.987 | -2.611 |
| H | 12.586 | -2.357 | -1.369 |
| C | 5.313  | -6.320 | 0.344  |
| C | 12.777 | -1.807 | -2.304 |
| C | 5.753  | -5.018 | 0.017  |
| H | 7.880  | -1.231 | 0.015  |
| C | 6.804  | -0.987 | -0.057 |
| H | 4.292  | -6.614 | 0.094  |
| H | 6.599  | -0.133 | 0.614  |
| C | 3.497  | -3.941 | -0.160 |
| H | 10.910 | -6.645 | -0.886 |
| C | 4.821  | -4.064 | -0.640 |
| H | 10.157 | -2.547 | -2.027 |
| H | 1.572  | -2.984 | -0.343 |
| O | 6.421  | -0.650 | -1.378 |
| C | 11.804 | -2.220 | -3.388 |
| C | 2.585  | -3.058 | -0.744 |
| H | 9.084  | -5.057 | -1.481 |
| C | 10.480 | -2.549 | -3.065 |
| C | 10.513 | -6.627 | -1.903 |
| H | 13.222 | -2.053 | -5.019 |
| C | 9.487  | -5.734 | -2.234 |
| C | 12.193 | -2.288 | -4.740 |
| C | 5.178  | -3.276 | -1.759 |
| H | 6.728  | -5.618 | -2.235 |
| H | 8.420  | 1.243  | -1.276 |
| H | 11.830 | -8.195 | -2.623 |
| H | 4.847  | -6.945 | -2.538 |
| C | 2.967  | -2.244 | -1.830 |
| C | 11.028 | -7.499 | -2.879 |
| C | 8.974  | 0.782  | -2.116 |
| C | 9.541  | -2.879 | -4.053 |

|   |        |        |        |
|---|--------|--------|--------|
| C | 4.263  | -2.390 | -2.341 |
| C | 6.568  | -4.899 | -3.049 |
| H | 1.609  | -0.569 | -1.666 |
| C | 8.964  | -5.705 | -3.540 |
| C | 11.275 | -2.670 | -5.724 |
| C | 2.007  | -1.245 | -2.441 |
| C | 4.546  | -6.373 | -3.418 |
| H | 8.676  | 1.319  | -3.038 |
| H | 2.513  | -0.634 | -3.203 |
| C | 7.856  | -4.740 | -3.899 |
| C | 9.931  | -2.972 | -5.413 |
| C | 10.512 | -7.471 | -4.185 |
| H | 2.768  | -7.551 | -3.793 |
| C | 5.336  | -5.289 | -3.835 |
| H | 4.574  | -1.804 | -3.200 |
| H | 11.590 | -2.727 | -6.767 |
| C | 9.483  | -6.573 | -4.515 |
| C | 3.377  | -6.706 | -4.121 |
| H | 1.146  | -1.749 | -2.911 |
| O | 5.347  | 0.195  | -4.072 |
| H | 10.910 | -8.144 | -4.947 |
| H | 7.619  | -4.842 | -4.964 |
| C | 4.942  | -4.533 | -4.954 |
| H | 9.085  | -6.536 | -5.530 |
| H | 6.820  | 2.579  | -4.669 |
| C | 9.026  | -3.419 | -6.505 |
| H | 7.408  | -2.089 | -5.993 |
| C | 2.989  | -5.950 | -5.239 |
| H | 10.451 | -4.853 | -7.279 |
| H | 8.093  | 2.400  | -5.910 |
| H | 5.550  | -3.686 | -5.272 |
| C | 6.577  | 0.862  | -5.982 |
| H | 5.179  | -1.523 | -6.109 |
| C | 5.120  | 0.560  | -5.473 |
| C | 7.014  | 2.310  | -5.715 |
| C | 7.733  | -2.880 | -6.665 |
| C | 9.458  | -4.420 | -7.404 |
| C | 3.775  | -4.860 | -5.655 |
| H | 2.078  | -6.206 | -5.784 |
| H | 3.565  | -0.940 | -5.620 |
| H | 4.533  | 2.586  | -4.917 |
| C | 4.489  | -0.668 | -6.151 |
| H | 7.900  | 0.705  | -7.684 |
| H | 6.647  | -0.562 | -7.646 |
| C | 6.846  | 0.497  | -7.443 |
| C | 4.157  | 1.748  | -5.520 |
| H | 3.176  | 1.444  | -5.126 |
| H | 6.476  | 3.009  | -6.372 |
| H | 3.478  | -4.265 | -6.521 |
| C | 6.892  | -3.337 | -7.690 |
| H | 4.246  | -0.460 | -7.204 |
| C | 8.615  | -4.878 | -8.427 |
| H | 6.212  | 1.110  | -8.102 |
| H | 4.024  | 2.089  | -6.559 |
| H | 5.894  | -2.907 | -7.802 |
| H | 8.963  | -5.660 | -9.105 |
| C | 7.325  | -4.341 | -8.572 |
| H | 6.665  | -4.700 | -9.363 |

|   |       |        |        |
|---|-------|--------|--------|
| H | 1.411 | 0.039  | 2.906  |
| H | 2.574 | -1.322 | 1.157  |
| C | 2.128 | 0.510  | 2.231  |
| C | 2.779 | -0.256 | 1.249  |
| H | 1.896 | 2.485  | 3.104  |
| C | 2.402 | 1.887  | 2.344  |
| C | 3.700 | 0.346  | 0.383  |
| H | 4.207 | -0.243 | -0.383 |
| C | 3.325 | 2.491  | 1.486  |
| C | 3.994 | 1.729  | 0.492  |
| H | 3.531 | 3.557  | 1.587  |
| C | 5.406 | 3.595  | -0.443 |
| C | 6.423 | 4.068  | -1.384 |
| O | 6.880 | 3.346  | -2.297 |
| H | 6.095 | 6.188  | -1.551 |
| C | 6.893 | 5.505  | -1.211 |
| H | 7.077 | 5.732  | -0.149 |
| H | 7.801 | 5.696  | -1.797 |
| H | 5.022 | 4.332  | 0.265  |
| H | 5.429 | 1.597  | -1.130 |

|                                              | 1       | 2       | 3                           |
|----------------------------------------------|---------|---------|-----------------------------|
|                                              | A       | A       | A                           |
| Frequencies --                               | 11.1958 | 14.2595 | 17.3692                     |
| Red. masses --                               | 5.4444  | 5.4240  | 4.8245                      |
| Zero-point correction=                       |         |         | 1.315344 (Hartree/Particle) |
| Thermal correction to Energy=                |         |         | 1.392892                    |
| Thermal correction to Enthalpy=              |         |         | 1.393836                    |
| Thermal correction to Gibbs Free Energy=     |         |         | 1.195678                    |
| Sum of electronic and zero-point Energies=   |         |         | -3280.109200                |
| Sum of electronic and thermal Energies=      |         |         | -3280.031652                |
| Sum of electronic and thermal Enthalpies=    |         |         | -3280.030707                |
| Sum of electronic and thermal Free Energies= |         |         | -3280.228866                |

| Item          | Value    | Threshold | Converged? |
|---------------|----------|-----------|------------|
| Maximum Force | 0.000022 | 0.000450  | YES        |
| RMS Force     | 0.000002 | 0.000300  | YES        |

---

### Transition State of I

---

Cartesian coordinates (Angstroms):

---

158

|   |       |       |       |
|---|-------|-------|-------|
| H | 3.890 | 3.060 | 7.855 |
| H | 5.444 | 4.300 | 5.701 |
| H | 4.514 | 1.743 | 8.868 |
| C | 4.396 | 2.082 | 7.827 |
| H | 2.588 | 0.912 | 7.606 |
| H | 4.018 | 3.393 | 3.937 |
| H | 6.263 | 3.204 | 7.549 |
| H | 5.264 | 4.387 | 3.143 |
| H | 3.201 | 1.578 | 6.095 |
| C | 3.511 | 1.096 | 7.036 |
| C | 5.875 | 3.540 | 5.037 |
| C | 5.093 | 3.467 | 3.719 |

|   |        |        |        |
|---|--------|--------|--------|
| C | 5.816  | 2.253  | 7.235  |
| H | 6.931  | 3.794  | 4.857  |
| N | 5.819  | 2.244  | 5.756  |
| H | 6.481  | 1.454  | 7.587  |
| C | 4.159  | -0.265 | 6.702  |
| H | 4.382  | -0.812 | 7.630  |
| C | 5.545  | 2.248  | 2.906  |
| C | 5.634  | 1.095  | 5.089  |
| H | 3.422  | -0.860 | 6.143  |
| H | 4.852  | 2.032  | 2.084  |
| H | 6.552  | 2.410  | 2.490  |
| N | 5.559  | 1.057  | 3.765  |
| C | 5.475  | -0.201 | 5.851  |
| H | 6.353  | -0.323 | 6.500  |
| H | 5.361  | 0.127  | 3.320  |
| H | 5.494  | -1.024 | 5.126  |
| H | -4.552 | -1.051 | 5.292  |
| H | -2.140 | -1.604 | 4.917  |
| C | -3.897 | -0.338 | 4.786  |
| C | -2.545 | -0.651 | 4.569  |
| H | -5.452 | 1.148  | 4.506  |
| C | -4.401 | 0.897  | 4.348  |
| C | -1.703 | 0.260  | 3.914  |
| H | -0.651 | 0.033  | 3.770  |
| H | 2.638  | 1.862  | 3.258  |
| H | -2.823 | -4.136 | 3.942  |
| H | -1.580 | 3.933  | 4.423  |
| H | -1.245 | -4.934 | 3.804  |
| H | -2.718 | -5.801 | 3.301  |
| C | -3.558 | 1.812  | 3.698  |
| C | -2.226 | -4.817 | 3.313  |
| C | -2.199 | 1.504  | 3.470  |
| H | 0.281  | -5.712 | -0.560 |
| H | 2.133  | 0.530  | 4.345  |
| C | 2.343  | 0.803  | 3.296  |
| H | 1.192  | -3.967 | 0.963  |
| H | -3.950 | 2.772  | 3.356  |
| H | 3.163  | 0.180  | 2.917  |
| C | -1.122 | 3.763  | 3.447  |
| H | -5.874 | -1.479 | 2.671  |
| C | 0.989  | -4.979 | -0.944 |
| C | -1.320 | 2.518  | 2.819  |
| C | 1.507  | -4.004 | -0.080 |
| H | -1.613 | -2.257 | 2.579  |
| H | -0.216 | 5.725  | 3.370  |
| O | 1.173  | 0.656  | 2.508  |
| C | -2.069 | -4.264 | 1.913  |
| C | -0.355 | 4.774  | 2.851  |
| H | -3.632 | -0.578 | 2.096  |
| O | 4.803  | -1.273 | 2.574  |
| H | 6.914  | -0.036 | 1.254  |
| C | -1.718 | -2.918 | 1.724  |
| C | -5.573 | -1.406 | 1.624  |
| H | 0.943  | -5.747 | -2.972 |
| C | 1.359  | -4.997 | -2.297 |
| H | -2.609 | -6.095 | 0.889  |
| H | 0.875  | -1.419 | 4.329  |
| C | 5.280  | -1.444 | 1.400  |

|   |        |        |        |
|---|--------|--------|--------|
| C | -4.309 | -0.896 | 1.304  |
| C | 2.443  | -3.055 | -0.543 |
| C | 3.105  | -2.155 | 0.439  |
| C | -2.304 | -5.053 | 0.771  |
| C | -0.709 | 2.324  | 1.558  |
| H | -3.088 | 1.489  | 0.829  |
| B | 0.848  | -0.473 | 1.722  |
| C | 4.497  | -1.914 | 0.314  |
| C | 6.753  | -1.124 | 1.171  |
| H | 2.427  | -1.951 | 3.604  |
| H | -7.430 | -2.218 | 0.850  |
| H | -3.565 | 3.627  | 0.090  |
| C | 0.217  | 4.587  | 1.580  |
| C | -6.445 | -1.819 | 0.601  |
| C | 1.332  | -2.071 | 3.564  |
| N | -1.020 | 1.152  | 0.784  |
| C | -0.566 | -0.115 | 0.928  |
| H | 7.366  | -1.605 | 1.950  |
| C | -1.536 | -2.388 | 0.441  |
| O | 0.825  | -1.781 | 2.263  |
| C | 2.263  | -4.033 | -2.779 |
| C | 0.001  | 3.355  | 0.939  |
| H | 7.105  | -1.446 | 0.179  |
| C | 2.803  | -3.080 | -1.910 |
| C | -2.334 | 1.215  | 0.075  |
| H | 0.794  | 6.661  | 1.313  |
| N | -1.413 | -0.964 | 0.309  |
| C | -3.904 | -0.801 | -0.040 |
| C | -2.151 | -4.515 | -0.512 |
| C | 1.038  | 5.667  | 0.909  |
| C | -3.015 | 3.463  | -0.840 |
| B | 2.365  | -0.196 | 0.127  |
| H | 1.072  | -3.117 | 3.788  |
| H | 2.117  | 5.496  | 1.066  |
| C | -2.541 | -0.246 | -0.385 |
| H | 2.547  | -4.027 | -3.834 |
| C | -1.743 | -3.181 | -0.713 |
| C | -6.046 | -1.719 | -0.742 |
| H | -3.517 | 5.398  | -1.672 |
| C | -2.333 | 2.249  | -1.030 |
| H | 0.356  | 3.198  | -0.075 |
| H | 3.504  | -2.340 | -2.290 |
| H | -2.312 | -5.146 | -1.387 |
| C | -4.775 | -1.213 | -1.061 |
| C | -2.983 | 4.459  | -1.828 |
| O | 2.013  | -0.099 | -1.217 |
| H | 0.865  | 5.677  | -0.179 |
| O | 3.231  | 0.837  | 0.493  |
| H | -6.720 | -2.037 | -1.540 |
| H | -2.374 | -0.339 | -1.464 |
| C | -1.612 | 2.039  | -2.220 |
| H | -4.451 | -1.146 | -2.101 |
| H | 4.316  | -0.412 | -2.628 |
| C | -1.554 | -2.659 | -2.087 |
| H | 0.320  | -1.664 | -1.646 |
| C | -2.264 | 4.244  | -3.015 |
| H | -3.378 | -3.538 | -2.857 |
| H | 2.902  | -0.197 | -3.693 |

|   |        |        |        |
|---|--------|--------|--------|
| H | -1.065 | 1.108  | -2.372 |
| C | 2.781  | 0.962  | -1.870 |
| H | 2.409  | 3.285  | -0.205 |
| C | 3.675  | 1.568  | -0.689 |
| C | 3.590  | 0.318  | -3.007 |
| C | -0.434 | -1.862 | -2.401 |
| C | -2.500 | -2.934 | -3.097 |
| C | -1.579 | 3.032  | -3.209 |
| H | -2.237 | 5.017  | -3.786 |
| H | 4.064  | 3.375  | 0.435  |
| H | 5.402  | 0.240  | -0.882 |
| C | 3.456  | 3.064  | -0.428 |
| H | 1.194  | 1.431  | -3.260 |
| H | 1.078  | 2.324  | -1.733 |
| C | 1.779  | 1.946  | -2.484 |
| C | 5.182  | 1.314  | -0.856 |
| H | 5.721  | 1.755  | -0.005 |
| H | 4.135  | 1.089  | -3.572 |
| H | -1.014 | 2.860  | -4.127 |
| C | -0.277 | -1.336 | -3.689 |
| H | 3.768  | 3.660  | -1.300 |
| C | -2.339 | -2.409 | -4.389 |
| H | 2.298  | 2.797  | -2.948 |
| H | 5.555  | 1.780  | -1.780 |
| H | 0.602  | -0.727 | -3.911 |
| H | -3.086 | -2.622 | -5.156 |
| C | -1.229 | -1.601 | -4.688 |
| H | -1.107 | -1.185 | -5.690 |
| H | 2.752  | -2.290 | 1.456  |
| H | 4.990  | -2.048 | -0.650 |

|                                              |           |         |                             |
|----------------------------------------------|-----------|---------|-----------------------------|
|                                              | 1         | 2       | 3                           |
|                                              | A         | A       | A                           |
| Frequencies --                               | -412.8472 | 14.9871 | 19.2513                     |
| Red. masses --                               | 10.7239   | 5.3091  | 4.8421                      |
| Zero-point correction=                       |           |         | 1.316385 (Hartree/Particle) |
| Thermal correction to Energy=                |           |         | 1.392395                    |
| Thermal correction to Enthalpy=              |           |         | 1.393339                    |
| Thermal correction to Gibbs Free Energy=     |           |         | 1.202838                    |
| Sum of electronic and zero-point Energies=   |           |         | -3280.074135                |
| Sum of electronic and thermal Energies=      |           |         | -3279.998125                |
| Sum of electronic and thermal Enthalpies=    |           |         | -3279.997181                |
| Sum of electronic and thermal Free Energies= |           |         | -3280.187682                |

| Item          | Value    | Threshold | Converged? |
|---------------|----------|-----------|------------|
| Maximum Force | 0.000055 | 0.000450  | YES        |
| RMS Force     | 0.000006 | 0.000300  | YES        |

---

## Transition State of II

---

Cartesian coordinates (Angstroms):

---

158

|   |       |        |       |
|---|-------|--------|-------|
| H | 5.653 | 19.226 | 5.250 |
| C | 5.926 | 18.178 | 5.066 |

|   |        |        |        |
|---|--------|--------|--------|
| H | 4.046  | 17.855 | 4.034  |
| H | 5.730  | 18.004 | 7.204  |
| C | 5.104  | 17.577 | 3.920  |
| H | 5.458  | 17.968 | 2.957  |
| N | 5.651  | 17.452 | 6.314  |
| H | 7.004  | 18.123 | 4.844  |
| H | 2.759  | 16.347 | 8.468  |
| H | 2.451  | 16.385 | 6.026  |
| H | 5.070  | 16.390 | 8.491  |
| C | 5.112  | 16.241 | 6.371  |
| C | 2.342  | 15.432 | 6.564  |
| C | 3.149  | 15.505 | 7.878  |
| H | 1.273  | 15.344 | 6.814  |
| C | 4.699  | 15.701 | 7.721  |
| C | 5.230  | 16.048 | 3.928  |
| N | 4.910  | 15.505 | 5.269  |
| H | 4.527  | 15.597 | 3.216  |
| H | 6.250  | 15.736 | 3.656  |
| H | 2.981  | 14.592 | 8.469  |
| C | 2.733  | 14.284 | 5.611  |
| H | 2.212  | 14.431 | 4.652  |
| H | 5.216  | 14.743 | 7.875  |
| C | 4.257  | 14.181 | 5.365  |
| H | 2.402  | 13.315 | 6.018  |
| H | 4.741  | 13.615 | 6.171  |
| H | 4.470  | 13.652 | 4.428  |
| H | -3.177 | 21.413 | 12.061 |
| H | -0.964 | 20.499 | 11.331 |
| C | -2.438 | 22.068 | 11.597 |
| C | -1.196 | 21.555 | 11.183 |
| H | -3.688 | 23.837 | 11.712 |
| C | -2.723 | 23.430 | 11.404 |
| C | -0.247 | 22.394 | 10.579 |
| H | 0.712  | 21.987 | 10.260 |
| H | 2.261  | 19.592 | 10.789 |
| H | -1.599 | 16.366 | 8.913  |
| H | 0.346  | 26.078 | 11.431 |
| H | -1.248 | 17.827 | 9.885  |
| H | 0.082  | 16.819 | 9.276  |
| C | -1.771 | 24.273 | 10.811 |
| C | -0.916 | 17.222 | 9.027  |
| C | -0.521 | 23.765 | 10.390 |
| H | 2.916  | 24.598 | 12.206 |
| H | 1.601  | 18.852 | 9.296  |
| C | 2.356  | 19.549 | 9.694  |
| H | 3.099  | 22.508 | 10.856 |
| H | -1.994 | 25.330 | 10.658 |
| H | 3.361  | 19.189 | 9.425  |
| C | 0.815  | 25.877 | 10.466 |
| H | -4.547 | 21.269 | 9.443  |
| C | 3.680  | 24.516 | 11.432 |
| C | 0.489  | 24.681 | 9.797  |
| C | 3.777  | 23.342 | 10.674 |
| H | -0.397 | 19.914 | 8.772  |
| H | 1.964  | 27.705 | 10.480 |
| O | 2.129  | 20.873 | 9.201  |
| C | -0.858 | 18.049 | 7.761  |
| C | 1.731  | 26.790 | 9.931  |



|   |        |        |        |
|---|--------|--------|--------|
| H | -2.270 | 22.066 | 8.862  |
| H | 4.282  | 21.122 | 9.396  |
| O | 5.658  | 19.160 | 8.437  |
| H | 8.263  | 18.851 | 8.216  |
| C | -0.548 | 19.417 | 7.815  |
| C | -4.281 | 21.425 | 8.396  |
| H | 4.467  | 26.509 | 11.767 |
| C | 4.547  | 25.591 | 11.183 |
| H | -1.369 | 16.418 | 6.429  |
| H | 2.312  | 18.242 | 7.244  |
| C | 6.501  | 20.112 | 8.288  |
| C | -2.996 | 21.879 | 8.072  |
| C | 4.755  | 23.210 | 9.665  |
| C | 4.914  | 21.898 | 8.981  |
| C | -1.103 | 17.475 | 6.497  |
| C | 1.118  | 24.446 | 8.546  |
| H | -1.450 | 24.053 | 7.948  |
| B | 2.185  | 21.206 | 7.817  |
| C | 6.208  | 21.465 | 8.589  |
| C | 7.884  | 19.769 | 7.740  |
| H | 3.867  | 19.138 | 7.189  |
| H | -6.218 | 20.819 | 7.629  |
| H | -1.494 | 26.362 | 7.759  |
| C | 2.359  | 26.543 | 8.700  |
| C | -5.217 | 21.173 | 7.377  |
| C | 2.877  | 19.034 | 6.727  |
| N | 0.550  | 23.453 | 7.672  |
| C | 0.844  | 22.164 | 7.455  |
| H | 8.605  | 20.587 | 7.888  |
| C | -0.417 | 20.176 | 6.644  |
| H | 7.003  | 22.195 | 8.434  |
| O | 2.161  | 20.249 | 6.774  |
| C | 5.504  | 25.485 | 10.158 |
| C | 2.014  | 25.371 | 8.007  |
| H | 7.817  | 19.574 | 6.656  |
| C | 5.600  | 24.311 | 9.402  |
| C | -0.789 | 23.840 | 7.096  |
| H | 3.299  | 28.495 | 8.578  |
| N | -0.175 | 21.582 | 6.780  |
| C | -2.636 | 22.084 | 6.728  |
| C | -1.009 | 18.244 | 5.331  |
| C | 3.367  | 27.501 | 8.110  |
| C | -1.065 | 26.319 | 6.756  |
| B | 3.986  | 22.124 | 7.115  |
| H | 2.986  | 18.756 | 5.668  |
| H | 4.390  | 27.119 | 8.270  |
| C | -1.241 | 22.550 | 6.371  |
| H | 6.173  | 26.322 | 9.946  |
| C | -0.648 | 19.607 | 5.374  |
| C | -4.860 | 21.378 | 6.034  |
| H | -1.207 | 28.453 | 6.426  |
| C | -0.669 | 25.076 | 6.231  |
| H | 2.425  | 25.176 | 7.024  |
| H | 6.335  | 24.247 | 8.599  |
| H | -1.187 | 17.783 | 4.358  |
| C | -3.571 | 21.830 | 5.711  |
| C | -0.896 | 27.494 | 6.008  |
| O | 4.547  | 21.371 | 6.070  |

|   |        |        |       |
|---|--------|--------|-------|
| H | 3.220  | 27.613 | 7.023 |
| O | 3.984  | 23.476 | 6.783 |
| H | -5.583 | 21.184 | 5.239 |
| H | -1.174 | 22.667 | 5.282 |
| C | -0.093 | 25.021 | 4.948 |
| H | -3.282 | 21.979 | 4.669 |
| H | 6.896  | 22.655 | 6.273 |
| C | -0.498 | 20.386 | 4.119 |
| H | 1.458  | 21.138 | 4.633 |
| C | -0.322 | 27.433 | 4.728 |
| H | -2.419 | 19.786 | 3.324 |
| H | 7.031  | 21.269 | 5.164 |
| H | 0.238  | 24.067 | 4.535 |
| C | 5.114  | 22.266 | 5.073 |
| H | 2.443  | 23.083 | 4.677 |
| C | 4.418  | 23.649 | 5.401 |
| C | 6.638  | 22.290 | 5.272 |
| C | 0.665  | 21.152 | 3.885 |
| C | -1.515 | 20.370 | 3.142 |
| C | 0.078  | 26.193 | 4.199 |
| H | -0.187 | 28.345 | 4.144 |
| H | 2.668  | 24.831 | 4.910 |
| H | 6.189  | 24.770 | 6.022 |
| C | 3.155  | 23.909 | 4.566 |
| H | 5.314  | 20.746 | 3.540 |
| H | 3.707  | 21.517 | 3.576 |
| C | 4.784  | 21.700 | 3.686 |
| C | 5.336  | 24.875 | 5.339 |
| H | 4.766  | 25.771 | 5.628 |
| H | 7.120  | 22.934 | 4.521 |
| H | 0.527  | 26.138 | 3.206 |
| C | 0.796  | 21.898 | 2.705 |
| H | 3.402  | 24.027 | 3.501 |
| C | -1.382 | 21.119 | 1.962 |
| H | 5.109  | 22.397 | 2.897 |
| H | 5.715  | 25.018 | 4.315 |
| H | 1.700  | 22.485 | 2.535 |
| H | -2.183 | 21.106 | 1.220 |
| C | -0.229 | 21.889 | 1.743 |
| H | -0.127 | 22.477 | 0.828 |

|                                              |           |              |                    |
|----------------------------------------------|-----------|--------------|--------------------|
|                                              | 1         | 2            | 3                  |
|                                              | A         | A            | A                  |
| Frequencies --                               | -404.1519 | 14.9932      | 17.9827            |
| Red. masses --                               | 10.7915   | 4.6450       | 4.8961             |
| Zero-point correction=                       |           | 1.316048     | (Hartree/Particle) |
| Thermal correction to Energy=                |           | 1.391914     |                    |
| Thermal correction to Enthalpy=              |           | 1.392859     |                    |
| Thermal correction to Gibbs Free Energy=     |           | 1.203083     |                    |
| Sum of electronic and zero-point Energies=   |           | -3280.072629 |                    |
| Sum of electronic and thermal Energies=      |           | -3279.996763 |                    |
| Sum of electronic and thermal Enthalpies=    |           | -3279.995818 |                    |
| Sum of electronic and thermal Free Energies= |           | -3280.185594 |                    |

|         | Item  | Value    | Threshold | Converged? |
|---------|-------|----------|-----------|------------|
| Maximum | Force | 0.000004 | 0.000450  | YES        |
| RMS     | Force | 0.000000 | 0.000300  | YES        |

Next, computations were carried out on the NHC catalyzed enantioselective silyl conjugate addition to an acyclic enone (Scheme S10). There are several differences compared to the boron conjugate addition variants: 1) The calculated B–Si bond length of PhMe<sub>2</sub>Si–B(pin) is 2.05 Å, which is significantly longer than the bond length of B–B in B<sub>2</sub>(pin)<sub>2</sub> (1.70 Å). 2) The reaction proceeds more efficiently when H<sub>2</sub>O is used as a co-solvent with thf instead MeOH. As mentioned in the manuscript, H<sub>2</sub>O is probably responsible for the hydrolysis of the B(pin) unit, generating (HO)<sub>2</sub>B–SiPhMe<sub>2</sub>, which may facilitate effective coordination of NHC to the boron center. The computational study suggests an interesting feature of the transformation: Instead of Lewis acid activation of the carbonyl group by dbuH<sup>+</sup>, an intramolecular chelation by the two hydroxyl groups of the (HO)<sub>2</sub>B–SiPhMe<sub>2</sub> to the carbonyl group of the enone takes place in the favored transition state **III**. The activation barrier of **III** is 14.8 kcal/mol. The unfavored pathway via transition state **IV**, which also involves such a chelation, is 2.0 kcal/mol higher in energy than **III**. This is probably due to the steric repulsion between the SiMe<sub>2</sub>Ph unit and the N-Ar motif of the NHC. Such interactions may also lead to the variation of the N–C–B angle from 124° to 129° in TS **III** and **IV**, respectively.

**Scheme S10.** The transition state of the C–Si bond formation in an achiral NHC catalyzed SCA reaction

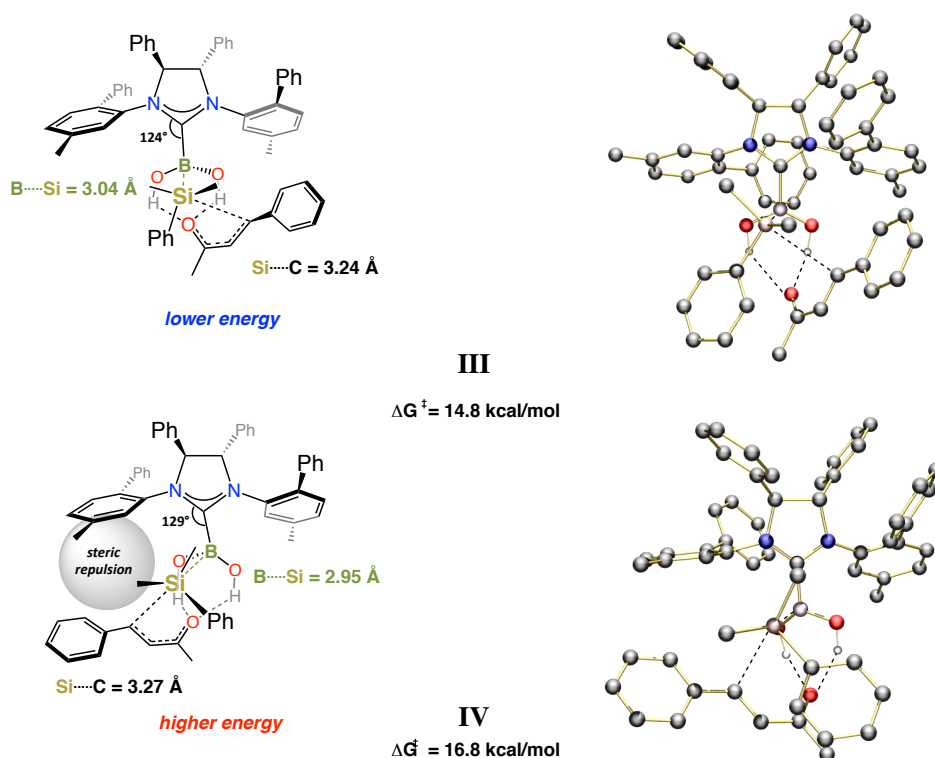

### Ground State of III and IV

Cartesian coordinates (Angstroms):

123

C      0.381      -0.958      3.147

|    |        |        |        |
|----|--------|--------|--------|
| H  | 2.208  | 1.536  | 1.258  |
| H  | 3.612  | 0.479  | 1.138  |
| C  | 2.688  | 0.655  | 1.711  |
| H  | 2.976  | 0.916  | 2.745  |
| H  | -0.520 | -0.336 | 3.020  |
| Si | 1.567  | -0.903 | 1.625  |
| H  | 4.595  | -1.313 | 1.923  |
| H  | 0.883  | -0.640 | 4.078  |
| C  | 4.126  | -2.295 | 2.002  |
| C  | 2.719  | -2.407 | 1.906  |
| H  | 6.029  | -3.297 | 2.279  |
| H  | 0.036  | -1.995 | 3.293  |
| C  | 4.945  | -3.419 | 2.202  |
| C  | 2.169  | -3.710 | 2.012  |
| C  | 4.374  | -4.699 | 2.300  |
| H  | 1.087  | -3.842 | 1.933  |
| C  | 2.980  | -4.842 | 2.201  |
| H  | 5.008  | -5.576 | 2.450  |
| H  | 2.525  | -5.833 | 2.274  |
| H  | 6.934  | 4.421  | -0.696 |
| H  | 8.395  | 2.395  | -0.703 |
| C  | 6.490  | 3.430  | -0.809 |
| C  | 7.314  | 2.288  | -0.812 |
| C  | 5.099  | 3.292  | -0.950 |
| H  | 4.452  | 4.170  | -0.946 |
| H  | 7.400  | 0.136  | -0.954 |
| C  | 6.754  | 1.014  | -0.953 |
| H  | 5.842  | -4.233 | -0.327 |
| H  | 6.020  | -4.238 | -2.095 |
| C  | 5.282  | -4.205 | -1.275 |
| H  | 6.339  | -1.787 | -1.092 |
| C  | 4.536  | 2.018  | -1.093 |
| H  | 4.614  | -5.073 | -1.337 |
| C  | 5.352  | 0.859  | -1.096 |
| H  | 1.037  | -3.150 | -0.265 |
| C  | 4.480  | -2.914 | -1.359 |
| C  | 5.261  | -1.668 | -1.222 |
| H  | 3.456  | 1.907  | -1.194 |
| O  | 0.203  | -2.648 | -0.266 |
| C  | 4.689  | -0.433 | -1.237 |
| H  | 3.604  | -0.373 | -1.341 |
| B  | 0.576  | -1.214 | -0.221 |
| C  | -0.809 | -0.319 | -0.095 |
| H  | -3.997 | -4.485 | -1.635 |
| C  | -3.575 | -4.027 | -0.738 |
| H  | -4.106 | -5.685 | 0.544  |
| C  | 1.311  | 2.661  | -2.660 |
| C  | -3.632 | -4.703 | 0.489  |
| C  | -2.964 | -2.763 | -0.850 |
| O  | 1.383  | -0.811 | -1.384 |
| H  | 0.131  | 0.852  | -2.540 |
| C  | 0.454  | 1.751  | -2.023 |
| H  | 2.309  | 4.572  | -2.451 |
| C  | 1.656  | 3.839  | -1.973 |
| C  | -2.421 | -2.200 | 0.327  |
| C  | -3.087 | -4.134 | 1.655  |
| N  | -1.986 | -0.833 | 0.320  |
| C  | -2.492 | -2.864 | 1.554  |

|   |        |        |        |
|---|--------|--------|--------|
| C | 0.002  | 1.961  | -0.712 |
| H | 2.026  | -1.539 | -1.521 |
| N | -0.939 | 1.032  | -0.168 |
| H | -2.090 | -2.368 | 2.438  |
| C | 1.173  | 4.076  | -0.682 |
| C | 0.342  | 3.149  | -0.013 |
| H | 1.455  | 4.990  | -0.157 |
| C | -3.078 | 0.183  | 0.408  |
| C | -2.318 | 1.513  | 0.179  |
| O | 3.252  | -2.950 | -1.551 |
| H | -2.263 | 2.091  | 1.108  |
| H | -3.760 | -0.014 | -0.434 |
| C | -3.155 | -4.838 | 2.994  |
| C | 1.859  | 2.357  | -4.036 |
| H | -4.104 | 5.546  | -1.429 |
| H | -3.140 | 4.103  | 0.374  |
| C | -3.813 | 4.517  | -1.650 |
| C | -3.279 | 3.708  | -0.634 |
| H | -4.379 | 4.634  | -3.739 |
| C | -3.967 | 4.004  | -2.948 |
| C | -2.905 | 2.383  | -0.911 |
| C | -3.587 | 2.679  | -3.228 |
| C | -3.058 | 1.872  | -2.213 |
| H | -3.700 | 2.272  | -4.234 |
| H | -2.755 | 0.849  | -2.431 |
| H | -6.779 | -1.275 | 2.876  |
| H | -5.517 | -0.925 | 0.750  |
| C | -5.808 | -0.776 | 2.895  |
| C | -5.104 | -0.574 | 1.698  |
| H | -5.806 | -0.497 | 5.045  |
| C | -5.261 | -0.340 | 4.112  |
| C | -3.852 | 0.066  | 1.705  |
| C | -4.010 | 0.301  | 4.126  |
| C | -3.310 | 0.500  | 2.929  |
| H | -3.579 | 0.645  | 5.068  |
| H | -2.339 | 0.995  | 2.949  |
| H | -3.617 | -5.832 | 2.898  |
| H | -3.747 | -4.251 | 3.716  |
| H | -2.149 | -4.964 | 3.427  |
| H | 1.129  | 1.798  | -4.642 |
| H | 2.766  | 1.731  | -3.956 |
| H | 2.135  | 3.278  | -4.573 |
| H | -0.744 | -0.775 | -4.468 |
| H | -0.767 | -1.965 | -2.286 |
| C | -1.705 | -1.698 | -2.770 |
| C | -1.699 | -1.038 | -4.008 |
| C | -2.929 | -2.052 | -2.159 |
| C | -2.906 | -0.723 | -4.655 |
| H | -2.896 | -0.206 | -5.617 |
| C | -4.137 | -1.737 | -2.819 |
| C | -4.127 | -1.076 | -4.057 |
| H | -5.086 | -2.005 | -2.348 |
| H | -5.070 | -0.832 | -4.549 |
| H | -1.505 | 6.140  | 3.061  |
| H | -0.688 | 5.511  | 0.796  |
| C | -0.647 | 4.786  | 1.610  |
| C | -1.113 | 5.136  | 2.886  |
| C | -0.148 | 3.490  | 1.350  |

|   |        |       |       |
|---|--------|-------|-------|
| C | -1.087 | 4.196 | 3.930 |
| H | -1.451 | 4.466 | 4.923 |
| C | -0.128 | 2.557 | 2.408 |
| C | -0.588 | 2.906 | 3.685 |
| H | 0.250  | 1.557 | 2.228 |
| H | -0.554 | 2.166 | 4.487 |

|                                              | 1       | 2       | 3                           |
|----------------------------------------------|---------|---------|-----------------------------|
|                                              | A       | A       | A                           |
| Frequencies --                               | 11.3593 | 17.9751 | 19.4696                     |
| Red. masses --                               | 5.6808  | 5.2571  | 5.4842                      |
| Zero-point correction=                       |         |         | 0.987387 (Hartree/Particle) |
| Thermal correction to Energy=                |         |         | 1.050836                    |
| Thermal correction to Enthalpy=              |         |         | 1.051780                    |
| Thermal correction to Gibbs Free Energy=     |         |         | 0.884080                    |
| Sum of electronic and zero-point Energies=   |         |         | -2929.352738                |
| Sum of electronic and thermal Energies=      |         |         | -2929.289288                |
| Sum of electronic and thermal Enthalpies=    |         |         | -2929.288344                |
| Sum of electronic and thermal Free Energies= |         |         | -2929.456045                |

| Item          | Value    | Threshold | Converged? |
|---------------|----------|-----------|------------|
| Maximum Force | 0.000015 | 0.000450  | YES        |
| RMS Force     | 0.000002 | 0.000300  | YES        |

### Transition State of III

Cartesian coordinates (Angstroms):

123

|    |       |        |       |
|----|-------|--------|-------|
| C  | 0.889 | -1.344 | 2.902 |
| H  | 3.290 | 1.241  | 2.679 |
| H  | 4.613 | 0.084  | 2.721 |
| C  | 3.535 | 0.194  | 2.909 |
| H  | 3.355 | 0.028  | 3.988 |
| H  | 0.178 | -0.511 | 2.809 |
| Si | 2.491 | -1.057 | 1.857 |
| H  | 5.388 | -1.873 | 2.281 |
| H  | 1.132 | -1.471 | 3.974 |
| C  | 4.813 | -2.797 | 2.206 |
| C  | 3.408 | -2.728 | 2.011 |
| H  | 6.569 | -4.031 | 2.496 |
| H  | 0.373 | -2.248 | 2.552 |
| C  | 5.488 | -4.021 | 2.334 |
| C  | 2.721 | -3.967 | 1.920 |
| C  | 4.780 | -5.231 | 2.243 |
| H  | 1.641 | -3.967 | 1.760 |
| C  | 3.389 | -5.196 | 2.029 |
| H  | 5.302 | -6.186 | 2.337 |
| H  | 2.825 | -6.130 | 1.958 |
| H  | 6.104 | 4.314  | 1.606 |
| H  | 7.617 | 2.332  | 1.786 |
| C  | 5.810 | 3.360  | 1.164 |
| C  | 6.660 | 2.243  | 1.267 |
| C  | 4.581 | 3.237  | 0.492 |
| H  | 3.906 | 4.092  | 0.412 |
| H  | 6.952 | 0.155  | 0.813 |

|   |        |        |        |
|---|--------|--------|--------|
| C | 6.286  | 1.013  | 0.713  |
| H | 5.257  | -4.678 | -0.318 |
| H | 6.694  | -3.786 | -0.875 |
| C | 5.647  | -4.024 | -1.115 |
| H | 6.269  | -1.631 | -0.153 |
| C | 4.209  | 2.009  | -0.062 |
| H | 5.596  | -4.576 | -2.066 |
| C | 5.044  | 0.870  | 0.043  |
| H | 1.778  | -3.210 | -0.578 |
| C | 4.772  | -2.782 | -1.195 |
| C | 5.279  | -1.563 | -0.604 |
| H | 3.252  | 1.909  | -0.573 |
| O | 0.945  | -2.770 | -0.326 |
| C | 4.570  | -0.383 | -0.535 |
| H | 3.599  | -0.320 | -1.021 |
| B | 0.986  | -1.441 | -0.761 |
| C | -0.248 | -0.508 | -0.304 |
| H | -2.604 | -4.939 | -1.559 |
| C | -2.433 | -4.366 | -0.646 |
| H | -3.016 | -5.990 | 0.660  |
| C | 0.993  | 2.042  | -3.743 |
| C | -2.672 | -4.955 | 0.606  |
| C | -2.004 | -3.032 | -0.759 |
| O | 1.754  | -1.017 | -1.822 |
| H | -0.083 | 0.304  | -3.037 |
| C | 0.384  | 1.247  | -2.762 |
| H | 1.995  | 3.929  | -4.100 |
| C | 1.528  | 3.284  | -3.353 |
| C | -1.771 | -2.317 | 0.442  |
| C | -2.487 | -4.224 | 1.792  |
| N | -1.314 | -0.960 | 0.412  |
| C | -2.028 | -2.899 | 1.690  |
| C | 0.354  | 1.644  | -1.417 |
| H | 2.505  | -1.672 | -1.938 |
| N | -0.382 | 0.830  | -0.504 |
| H | -1.849 | -2.311 | 2.588  |
| C | 1.469  | 3.699  | -2.018 |
| C | 0.894  | 2.891  | -1.013 |
| H | 1.901  | 4.658  | -1.728 |
| C | -2.333 | 0.119  | 0.613  |
| C | -1.529 | 1.392  | 0.277  |
| O | 3.645  | -2.900 | -1.760 |
| H | -1.126 | 1.836  | 1.194  |
| H | -3.108 | -0.035 | -0.154 |
| C | -2.752 | -4.829 | 3.155  |
| C | 1.061  | 1.561  | -5.177 |
| H | -3.687 | 5.541  | 0.023  |
| H | -2.295 | 3.825  | 1.192  |
| C | -3.435 | 4.606  | -0.482 |
| C | -2.659 | 3.642  | 0.180  |
| H | -4.473 | 5.125  | -2.313 |
| C | -3.877 | 4.372  | -1.795 |
| C | -2.332 | 2.437  | -0.462 |
| C | -3.545 | 3.168  | -2.441 |
| C | -2.780 | 2.202  | -1.775 |
| H | -3.881 | 2.984  | -3.464 |
| H | -2.513 | 1.271  | -2.274 |
| H | -5.890 | -1.037 | 3.415  |

|   |        |        |        |
|---|--------|--------|--------|
| H | -4.778 | -0.835 | 1.192  |
| C | -4.896 | -0.592 | 3.342  |
| C | -4.274 | -0.474 | 2.091  |
| H | -4.714 | -0.234 | 5.473  |
| C | -4.236 | -0.142 | 4.496  |
| C | -2.991 | 0.093  | 1.976  |
| C | -2.958 | 0.434  | 4.389  |
| C | -2.340 | 0.552  | 3.136  |
| H | -2.441 | 0.791  | 5.282  |
| H | -1.346 | 0.996  | 3.075  |
| H | -3.161 | -5.847 | 3.067  |
| H | -3.467 | -4.214 | 3.725  |
| H | -1.824 | -4.882 | 3.750  |
| H | 0.120  | 1.074  | -5.475 |
| H | 1.864  | 0.813  | -5.297 |
| H | 1.266  | 2.392  | -5.869 |
| H | 0.131  | -2.651 | -4.910 |
| H | -0.097 | -3.600 | -2.613 |
| C | -0.810 | -2.859 | -2.975 |
| C | -0.678 | -2.313 | -4.260 |
| C | -1.834 | -2.423 | -2.111 |
| C | -1.576 | -1.329 | -4.705 |
| H | -1.476 | -0.907 | -5.707 |
| C | -2.736 | -1.440 | -2.570 |
| C | -2.608 | -0.895 | -3.857 |
| H | -3.560 | -1.126 | -1.928 |
| H | -3.320 | -0.140 | -4.198 |
| H | 0.190  | 6.181  | 2.227  |
| H | 0.235  | 5.365  | -0.126 |
| C | 0.519  | 4.697  | 0.689  |
| C | 0.480  | 5.150  | 2.016  |
| C | 0.879  | 3.365  | 0.392  |
| C | 0.794  | 4.275  | 3.070  |
| H | 0.754  | 4.623  | 4.103  |
| C | 1.219  | 2.503  | 1.457  |
| C | 1.165  | 2.950  | 2.784  |
| H | 1.524  | 1.479  | 1.236  |
| H | 1.429  | 2.264  | 3.590  |

|                                              | 1        | 2            | 3                  |
|----------------------------------------------|----------|--------------|--------------------|
|                                              | A        | A            | A                  |
| Frequencies --                               | -64.2757 | 14.2858      | 19.1044            |
| Red. masses --                               | 6.5243   | 5.1471       | 5.2584             |
| Zero-point correction=                       |          | 0.987137     | (Hartree/Particle) |
| Thermal correction to Energy=                |          | 1.049482     |                    |
| Thermal correction to Enthalpy=              |          | 1.050426     |                    |
| Thermal correction to Gibbs Free Energy=     |          | 0.886814     |                    |
| Sum of electronic and zero-point Energies=   |          | -2929.332124 |                    |
| Sum of electronic and thermal Energies=      |          | -2929.269780 |                    |
| Sum of electronic and thermal Enthalpies=    |          | -2929.268836 |                    |
| Sum of electronic and thermal Free Energies= |          | -2929.432448 |                    |

| Item          | Value    | Threshold | Converged? |
|---------------|----------|-----------|------------|
| Maximum Force | 0.000004 | 0.000450  | YES        |
| RMS Force     | 0.000001 | 0.000300  | YES        |

-----



**Transition State of IV**-----  
Cartesian coordinates (Angstroms):  
-----

123

|    |        |        |        |
|----|--------|--------|--------|
| H  | 7.578  | 3.886  | -0.549 |
| H  | 5.332  | 4.129  | -1.632 |
| C  | 6.720  | 3.326  | -0.170 |
| C  | 5.458  | 3.459  | -0.777 |
| C  | 6.864  | 2.465  | 0.932  |
| H  | 7.839  | 2.352  | 1.413  |
| C  | 4.357  | 2.742  | -0.284 |
| C  | 5.759  | 1.743  | 1.410  |
| C  | 4.470  | 1.866  | 0.828  |
| H  | 5.894  | 1.083  | 2.269  |
| C  | 3.334  | 0.728  | 3.400  |
| H  | 3.400  | 1.733  | 3.856  |
| H  | 3.388  | 2.865  | -0.769 |
| H  | 0.866  | 2.075  | 0.597  |
| C  | 1.511  | 2.164  | 1.480  |
| H  | 0.870  | 2.027  | 2.367  |
| H  | 1.898  | 3.198  | 1.511  |
| Si | 2.980  | 0.876  | 1.498  |
| H  | 4.269  | 0.191  | 3.620  |
| H  | 2.524  | 0.183  | 3.908  |
| C  | -2.049 | -4.479 | -2.520 |
| C  | -0.751 | -3.941 | -2.520 |
| C  | 0.973  | -1.671 | -5.874 |
| C  | -2.776 | -4.533 | -1.319 |
| C  | -0.184 | -3.448 | -1.334 |
| C  | -2.207 | -4.054 | -0.130 |
| C  | 0.573  | -0.440 | -5.088 |
| C  | -0.907 | -3.500 | -0.124 |
| C  | 0.379  | -0.523 | -3.700 |
| C  | 0.348  | 0.799  | -5.715 |
| C  | -0.245 | -3.855 | 2.273  |
| C  | -4.704 | 1.062  | -3.381 |
| C  | -0.344 | -2.993 | 1.160  |
| C  | -3.698 | 1.347  | -2.442 |
| C  | -4.779 | -0.213 | -3.964 |
| C  | 0.010  | 0.603  | -2.953 |
| C  | -0.026 | 1.924  | -4.968 |
| C  | 0.139  | -3.378 | 3.532  |
| C  | 0.441  | -0.297 | -0.697 |
| C  | -0.010 | -1.634 | 1.367  |
| N  | -0.304 | 0.420  | -1.567 |
| C  | -0.183 | 1.860  | -3.570 |
| C  | -2.772 | 0.357  | -2.079 |
| N  | -0.316 | -0.682 | 0.341  |
| C  | -3.852 | -1.206 | -3.600 |
| C  | -1.750 | -0.287 | 0.175  |
| C  | -1.699 | 0.657  | -1.059 |
| C  | 0.437  | -2.017 | 3.736  |
| C  | 0.355  | -1.153 | 2.631  |
| C  | -2.854 | -0.923 | -2.659 |
| C  | -0.512 | 3.072  | -2.783 |
| C  | -3.177 | -0.478 | 2.236  |

|   |        |        |        |
|---|--------|--------|--------|
| C | 0.805  | -1.495 | 5.107  |
| C | -2.320 | 0.307  | 1.444  |
| C | -1.588 | 3.908  | -3.147 |
| C | 0.257  | 3.400  | -1.646 |
| C | -3.659 | 0.008  | 3.461  |
| C | -1.948 | 1.589  | 1.891  |
| C | -1.906 | 5.034  | -2.372 |
| C | -0.065 | 4.521  | -0.869 |
| C | -3.283 | 1.286  | 3.903  |
| C | -1.151 | 5.338  | -1.226 |
| C | -2.427 | 2.075  | 3.115  |
| O | 2.490  | -1.808 | -0.978 |
| B | 2.032  | -0.501 | -0.933 |
| O | 4.963  | -1.067 | -1.694 |
| O | 2.609  | 0.553  | -1.641 |
| C | 5.926  | -0.843 | -0.899 |
| C | 7.131  | -0.093 | -1.443 |
| C | 4.860  | -1.777 | 1.148  |
| C | 5.940  | -1.224 | 0.493  |
| C | 3.690  | -2.912 | 3.002  |
| C | 4.833  | -2.214 | 2.538  |
| C | 3.615  | -3.379 | 4.318  |
| C | 5.896  | -1.989 | 3.451  |
| C | 4.675  | -3.144 | 5.213  |
| C | 5.813  | -2.444 | 4.772  |
| H | 3.551  | 0.341  | -1.814 |
| H | 3.452  | -1.757 | -1.254 |
| H | -2.489 | -4.854 | -3.446 |
| H | -0.175 | -3.906 | -3.447 |
| H | 1.099  | -1.438 | -6.942 |
| H | 0.209  | -2.462 | -5.784 |
| H | 1.920  | -2.090 | -5.496 |
| H | -3.787 | -4.947 | -1.308 |
| H | 0.830  | -3.049 | -1.333 |
| H | -2.771 | -4.094 | 0.804  |
| H | 0.489  | -1.477 | -3.186 |
| H | 0.474  | 0.885  | -6.797 |
| H | -0.499 | -4.908 | 2.142  |
| H | -5.423 | 1.835  | -3.657 |
| H | -3.623 | 2.339  | -1.995 |
| H | -5.557 | -0.434 | -4.697 |
| H | -0.169 | 2.886  | -5.465 |
| H | 0.181  | -4.068 | 4.378  |
| H | -3.904 | -2.201 | -4.047 |
| H | -2.304 | -1.205 | -0.074 |
| H | -1.763 | 1.710  | -0.753 |
| H | 0.519  | -0.086 | 2.753  |
| H | -2.135 | -1.693 | -2.379 |
| H | -3.456 | -1.476 | 1.892  |
| H | 0.478  | -0.451 | 5.232  |
| H | 1.897  | -1.525 | 5.256  |
| H | 0.343  | -2.106 | 5.898  |
| H | -2.191 | 3.652  | -4.020 |
| H | 1.109  | 2.771  | -1.392 |
| H | -4.323 | -0.610 | 4.068  |
| H | -1.268 | 2.199  | 1.298  |
| H | -2.748 | 5.667  | -2.657 |
| H | 0.536  | 4.753  | 0.013  |

|   |        |        |        |
|---|--------|--------|--------|
| H | -3.653 | 1.666  | 4.857  |
| H | -1.405 | 6.210  | -0.619 |
| H | -2.130 | 3.069  | 3.455  |
| H | 7.307  | -0.377 | -2.491 |
| H | 8.036  | -0.272 | -0.844 |
| H | 6.918  | 0.990  | -1.408 |
| H | 3.964  | -2.014 | 0.583  |
| H | 6.858  | -1.000 | 1.038  |
| H | 2.853  | -3.067 | 2.319  |
| H | 2.724  | -3.915 | 4.648  |
| H | 6.784  | -1.446 | 3.126  |
| H | 4.614  | -3.499 | 6.243  |
| H | 6.638  | -2.253 | 5.462  |

|                                              |           |              |                    |
|----------------------------------------------|-----------|--------------|--------------------|
|                                              | 1         | 2            | 3                  |
|                                              | A         | A            | A                  |
| Frequencies --                               | -104.6940 | 16.3073      | 19.7720            |
| Red. masses --                               | 7.1023    | 5.4909       | 5.1635             |
| Zero-point correction=                       |           | 0.987198     | (Hartree/Particle) |
| Thermal correction to Energy=                |           | 1.049456     |                    |
| Thermal correction to Enthalpy=              |           | 1.050400     |                    |
| Thermal correction to Gibbs Free Energy=     |           | 0.887837     |                    |
| Sum of electronic and zero-point Energies=   |           | -2929.329938 |                    |
| Sum of electronic and thermal Energies=      |           | -2929.267680 |                    |
| Sum of electronic and thermal Enthalpies=    |           | -2929.266736 |                    |
| Sum of electronic and thermal Free Energies= |           | -2929.429299 |                    |

|         | Item  | Value    | Threshold | Converged? |
|---------|-------|----------|-----------|------------|
| Maximum | Force | 0.000273 | 0.000450  | YES        |
| RMS     | Force | 0.000045 | 0.000300  | YES        |

-----

When we moved to investigate the enantioselective boron conjugate addition to a cyclic enone catalyzed by the same chiral NHC, experimental results obtained from reactions with this and several other chiral NHCs showed poor enantioselectivity when cyclohexenone is used as substrate (for instance, 55:45 er with NHC derived from **7c**). However, the boron conjugate addition to a sterically more hindered  $\beta$ -methyl substituted cyclohexenone resulted in good enantioselectivity (er = 84:16, NHC derived from **7c**). Two transition states (**V** and **VI**) for the addition of B(pin) unit to the enone that result in the two observed enantiomeric products were optimized (Scheme S11). In the favored transition state **V**, the substrate approaches the NHC•diboron complex from the right side. The distance between the two boron centers is 2.21 Å and the forming C···B bond length is 2.12 Å. The activation barrier  $\Delta G^\ddagger = 36.8$  kcal/mol. The longer bond lengths and the higher activation energy compared to TS **I** (Scheme S9) may be due to the sterically more demanding substrate (a trisubstituted olefin). The transition state **VI**, which is higher in energy than **V** by 4.8 kcal/mol, leads to the minor product. The breaking B···B bond length is 2.09 Å and the forming C···B bond length is 2.08 Å. Unfavorable steric interactions (highlighted in **VI**), which might be responsible for the variation in the N–C–B bond angle (from 123° to 133°), may explain why the reaction mainly follows the pathway involving transition state **V**.

**Scheme S11.** The transition state of the C–B bond formation in a chiral NHC catalyzed BCA reaction to a cyclic enone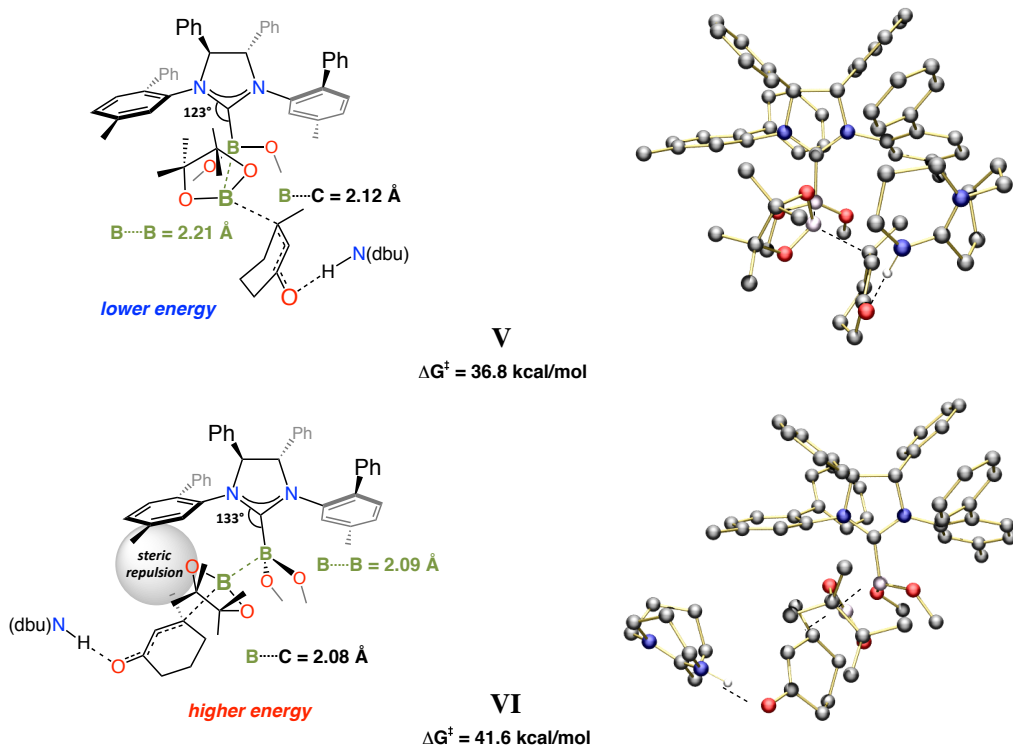

### Ground State of V and VI

-----  
 Cartesian coordinates (Angstroms):  
 -----

155

|   |         |        |        |
|---|---------|--------|--------|
| H | -9.870  | 16.269 | -5.607 |
| H | -10.681 | 24.295 | -6.232 |
| H | -11.169 | 15.183 | -5.097 |
| H | -9.337  | 17.856 | -6.975 |
| C | -10.917 | 16.236 | -5.279 |
| H | -12.892 | 15.083 | -7.150 |
| H | -10.466 | 23.363 | -8.812 |
| H | -11.039 | 22.688 | -3.976 |
| H | -11.510 | 24.339 | 0.610  |
| C | -11.737 | 23.989 | -6.363 |
| H | -11.997 | 25.275 | -0.826 |
| N | -11.770 | 16.697 | -6.395 |
| H | -11.073 | 22.118 | -0.379 |
| C | -10.168 | 18.544 | -6.755 |
| C | -13.071 | 16.008 | -6.579 |
| H | -10.286 | 16.859 | -3.327 |
| C | -12.350 | 24.554 | -0.068 |
| C | -11.562 | 23.209 | -8.773 |
| C | -11.444 | 17.798 | -7.084 |
| H | -11.931 | 25.256 | -8.127 |
| C | -11.919 | 22.257 | -4.486 |
| C | -11.856 | 22.540 | -5.952 |

|   |         |        |        |
|---|---------|--------|--------|
| C | -11.119 | 17.090 | -4.011 |
| H | -13.189 | 16.816 | -9.271 |
| H | -12.335 | 24.590 | -5.662 |
| C | -12.195 | 24.235 | -7.813 |
| H | -13.435 | 15.735 | -5.579 |
| H | -10.077 | 19.376 | -7.465 |
| H | -9.069  | 18.777 | -4.883 |
| H | -11.970 | 21.184 | -4.267 |
| C | -11.916 | 21.539 | -6.879 |
| C | -12.074 | 22.127 | -0.815 |
| C | -11.784 | 21.773 | -8.311 |
| N | -12.205 | 18.247 | -8.080 |
| C | -10.050 | 19.075 | -5.281 |
| H | -12.885 | 25.317 | -3.212 |
| H | -11.938 | 23.310 | -9.802 |
| C | -13.437 | 17.568 | -8.506 |
| H | -13.149 | 25.051 | 0.504  |
| H | -11.981 | 19.174 | -8.495 |
| H | -12.053 | 16.804 | -3.507 |
| C | -12.860 | 23.293 | -0.731 |
| C | -14.085 | 16.914 | -7.282 |
| O | -11.801 | 20.837 | -9.142 |
| H | -12.805 | 22.764 | -4.066 |
| H | -12.046 | 20.507 | -6.553 |
| C | -11.155 | 18.602 | -4.314 |
| H | -14.960 | 16.321 | -7.579 |
| H | -11.948 | 20.082 | -1.488 |
| C | -12.569 | 20.977 | -1.438 |
| C | -13.942 | 25.454 | -3.500 |
| H | -14.019 | 26.343 | -4.155 |
| H | -13.291 | 24.143 | -7.851 |
| H | -10.064 | 20.172 | -5.319 |
| H | -14.090 | 18.324 | -8.955 |
| H | -11.059 | 19.160 | -3.371 |
| H | -14.524 | 25.672 | -2.586 |
| C | -14.148 | 23.253 | -1.282 |
| H | -12.145 | 18.864 | -4.724 |
| H | -14.413 | 17.698 | -6.587 |
| O | -14.368 | 24.279 | -4.165 |
| C | -13.847 | 20.943 | -2.038 |
| H | -14.818 | 24.105 | -1.172 |
| C | -14.625 | 22.124 | -1.959 |
| H | -15.597 | 26.275 | -5.890 |
| H | -14.388 | 22.417 | -9.132 |
| H | -14.392 | 21.086 | -7.243 |
| H | -13.550 | 18.433 | -1.091 |
| H | -16.147 | 26.224 | 0.064  |
| C | -14.331 | 19.691 | -2.672 |
| B | -15.819 | 24.063 | -4.356 |
| H | -15.236 | 23.852 | -9.770 |
| C | -14.097 | 18.451 | -2.035 |
| C | -15.373 | 22.835 | -9.373 |
| O | -15.631 | 23.671 | -7.091 |
| C | -16.610 | 26.143 | -5.465 |
| O | -16.603 | 25.315 | -4.320 |
| B | -16.016 | 23.144 | -5.859 |
| C | -15.308 | 20.572 | -7.559 |
| C | -15.060 | 19.699 | -3.883 |

|   |         |        |         |
|---|---------|--------|---------|
| H | -17.001 | 27.134 | -5.174  |
| C | -17.172 | 25.863 | -0.052  |
| N | -15.981 | 22.146 | -2.406  |
| H | -15.253 | 20.638 | -4.399  |
| H | -15.188 | 20.239 | -8.600  |
| H | -17.024 | 25.666 | -2.215  |
| C | -14.588 | 17.255 | -2.577  |
| C | -16.284 | 22.887 | -8.144  |
| C | -16.547 | 23.095 | -3.184  |
| H | -15.834 | 22.215 | -10.157 |
| H | -15.455 | 19.691 | -6.923  |
| H | -17.255 | 25.729 | -6.264  |
| C | -17.652 | 25.542 | -1.331  |
| C | -16.376 | 21.040 | 2.527   |
| H | -17.620 | 25.962 | 2.070   |
| C | -16.784 | 22.247 | 1.930   |
| H | -14.402 | 16.311 | -2.062  |
| H | -16.210 | 20.991 | 3.605   |
| H | -16.937 | 23.140 | 2.539   |
| C | -17.999 | 25.719 | 1.075   |
| C | -16.180 | 19.898 | 1.732   |
| C | -16.995 | 22.309 | 0.547   |
| C | -16.518 | 21.505 | -7.434  |
| C | -15.576 | 18.505 | -4.405  |
| O | -16.626 | 21.896 | -6.020  |
| C | -15.341 | 17.278 | -3.763  |
| C | -16.390 | 19.964 | 0.345   |
| C | -16.801 | 21.167 | -0.252  |
| H | -15.862 | 18.959 | 2.190   |
| H | -17.301 | 23.248 | 0.086   |
| C | -16.989 | 21.242 | -1.750  |
| H | -17.356 | 24.642 | -8.811  |
| H | -16.227 | 19.084 | -0.281  |
| C | -17.593 | 23.618 | -8.487  |
| H | -16.181 | 18.533 | -5.312  |
| N | -17.882 | 22.955 | -3.125  |
| H | -16.876 | 20.240 | -2.182  |
| H | -15.750 | 16.354 | -4.175  |
| C | -18.978 | 25.082 | -1.499  |
| C | -19.317 | 25.259 | 0.915   |
| C | -17.799 | 20.773 | -7.836  |
| H | -18.245 | 23.673 | -7.605  |
| C | -18.335 | 21.871 | -2.209  |
| H | -18.133 | 23.106 | -9.298  |
| C | -18.894 | 23.799 | -3.686  |
| H | -17.774 | 20.532 | -8.911  |
| C | -19.504 | 24.768 | -2.857  |
| H | -17.882 | 20.455 | -4.495  |
| C | -19.805 | 24.948 | -0.364  |
| H | -17.879 | 19.832 | -7.273  |
| H | -18.854 | 22.345 | -1.362  |
| C | -19.388 | 23.513 | -4.963  |
| H | -18.898 | 22.733 | -5.543  |
| H | -19.965 | 25.139 | 1.786   |
| H | -18.692 | 21.379 | -7.632  |
| C | -18.859 | 20.233 | -4.068  |
| C | -20.635 | 25.435 | -3.366  |
| C | -19.268 | 20.894 | -2.894  |

|   |         |        |        |
|---|---------|--------|--------|
| C | -20.501 | 24.204 | -5.475 |
| H | -21.124 | 26.188 | -2.744 |
| H | -20.470 | 24.515 | -7.622 |
| C | -21.124 | 25.161 | -4.651 |
| H | -20.827 | 24.586 | -0.489 |
| C | -21.012 | 23.916 | -6.871 |
| C | -19.722 | 19.330 | -4.702 |
| H | -19.402 | 18.825 | -5.615 |
| C | -20.546 | 20.650 | -2.367 |
| H | -20.870 | 22.856 | -7.135 |
| H | -22.002 | 25.696 | -5.020 |
| H | -20.862 | 21.173 | -1.461 |
| H | -22.082 | 24.159 | -6.961 |
| C | -20.999 | 19.080 | -4.168 |
| C | -21.411 | 19.741 | -3.000 |
| H | -21.671 | 18.376 | -4.663 |
| H | -22.403 | 19.555 | -2.583 |

|                                              |         |         |                             |
|----------------------------------------------|---------|---------|-----------------------------|
|                                              | 1       | 2       | 3                           |
|                                              | A       | A       | A                           |
| Frequencies --                               | 13.8700 | 20.4338 | 24.1635                     |
| Red. masses --                               | 5.1341  | 5.5709  | 4.6885                      |
| Zero-point correction=                       |         |         | 1.299632 (Hartree/Particle) |
| Thermal correction to Energy=                |         |         | 1.374340                    |
| Thermal correction to Enthalpy=              |         |         | 1.375284                    |
| Thermal correction to Gibbs Free Energy=     |         |         | 1.186880                    |
| Sum of electronic and zero-point Energies=   |         |         | -3165.919920                |
| Sum of electronic and thermal Energies=      |         |         | -3165.845212                |
| Sum of electronic and thermal Enthalpies=    |         |         | -3165.844268                |
| Sum of electronic and thermal Free Energies= |         |         | -3166.032672                |

|  | Item          | Value    | Threshold | Converged? |
|--|---------------|----------|-----------|------------|
|  | Maximum Force | 0.000038 | 0.000450  | YES        |
|  | RMS Force     | 0.000002 | 0.000300  | YES        |

---

### Transition State of V

---

Cartesian coordinates (Angstroms):

---

155

|   |        |        |        |
|---|--------|--------|--------|
| B | 0.296  | -0.717 | -0.421 |
| B | 0.158  | -0.286 | 1.743  |
| H | 2.124  | -3.348 | -4.301 |
| H | 3.935  | -3.968 | -3.322 |
| H | 3.886  | -4.179 | -1.058 |
| N | 1.727  | -4.322 | -4.381 |
| H | -0.032 | -3.560 | -5.188 |
| C | 3.660  | -4.994 | -3.048 |
| C | 3.729  | -5.174 | -1.492 |
| H | 4.611  | -5.785 | -1.247 |
| C | 0.459  | -4.534 | -5.089 |
| C | 2.317  | -5.286 | -3.680 |
| H | 4.388  | -5.659 | -3.539 |
| H | 0.669  | -4.925 | -6.098 |
| C | 2.478  | -5.795 | -0.842 |

|   |        |        |        |
|---|--------|--------|--------|
| H | 1.592  | -5.207 | -1.124 |
| H | 2.561  | -5.708 | 0.250  |
| H | -0.675 | -5.073 | -3.332 |
| C | -0.397 | -5.526 | -4.293 |
| N | 1.769  | -6.504 | -3.554 |
| H | -1.315 | -5.772 | -4.842 |
| C | 2.239  | -7.272 | -1.218 |
| C | 0.399  | -6.808 | -4.034 |
| H | 3.500  | -7.551 | -2.982 |
| C | 2.432  | -7.535 | -2.727 |
| H | 2.947  | -7.924 | -0.681 |
| H | 0.482  | -7.420 | -4.945 |
| H | 1.223  | -7.561 | -0.911 |
| H | -0.091 | -7.408 | -3.255 |
| H | 2.011  | -8.505 | -3.023 |
| C | 0.373  | 2.141  | 1.232  |
| O | -0.397 | 1.008  | 1.629  |
| N | -0.955 | -2.623 | 2.586  |
| C | -2.286 | -3.267 | 2.864  |
| C | -1.064 | -1.321 | 2.236  |
| C | 2.009  | 0.438  | 3.306  |
| O | 1.376  | -0.486 | 2.434  |
| C | -3.253 | -2.063 | 2.780  |
| N | -2.366 | -0.962 | 2.295  |
| H | -3.603 | -1.776 | 3.783  |
| H | -2.488 | -3.974 | 2.051  |
| C | -2.505 | -5.390 | 4.217  |
| C | -2.088 | -3.979 | 6.609  |
| C | -2.501 | -6.075 | 5.443  |
| C | -2.308 | -4.000 | 4.186  |
| C | -2.098 | -3.297 | 5.386  |
| C | -2.291 | -5.371 | 6.640  |
| H | -1.933 | -2.221 | 5.362  |
| H | -1.922 | -3.423 | 7.534  |
| H | -2.283 | -5.903 | 7.593  |
| H | -2.656 | -7.155 | 5.462  |
| H | -2.648 | -5.932 | 3.280  |
| C | -4.244 | -2.685 | 0.536  |
| C | -6.843 | -2.200 | 1.482  |
| C | -4.440 | -2.276 | 1.868  |
| C | -5.342 | -2.853 | -0.318 |
| C | -6.645 | -2.612 | 0.155  |
| C | -5.741 | -2.030 | 2.336  |
| H | -3.231 | -2.849 | 0.166  |
| H | -5.183 | -3.165 | -1.351 |
| H | -7.500 | -2.743 | -0.511 |
| H | -7.852 | -2.009 | 1.853  |
| H | -5.886 | -1.700 | 3.367  |
| C | -4.451 | 1.949  | 1.233  |
| C | -4.557 | 2.643  | 2.452  |
| C | -3.673 | 0.780  | 1.210  |
| C | -3.908 | 2.173  | 3.602  |
| C | -2.979 | 0.339  | 2.339  |
| C | -3.108 | 1.013  | 3.576  |
| C | 1.599  | -5.327 | 2.925  |
| C | 2.404  | -4.792 | 3.936  |
| C | 0.488  | -4.631 | 2.403  |
| H | 3.261  | -5.360 | 4.303  |



|   |        |        |        |
|---|--------|--------|--------|
| C | 2.112  | -3.534 | 4.495  |
| C | 0.221  | -3.352 | 2.953  |
| C | 0.994  | -2.843 | 4.005  |
| H | 0.701  | -1.894 | 4.448  |
| H | -4.016 | 2.709  | 4.546  |
| C | -5.147 | 2.427  | -0.023 |
| C | 2.249  | -1.533 | -0.417 |
| H | -1.061 | -2.930 | -3.069 |
| H | 0.348  | -1.874 | -3.352 |
| H | -3.103 | -2.145 | -2.112 |
| C | -0.740 | -1.898 | -3.269 |
| H | -1.169 | -1.583 | -4.233 |
| O | -0.769 | -1.522 | -0.863 |
| C | -1.270 | -0.996 | -2.142 |
| C | -2.797 | -1.091 | -2.167 |
| H | -3.179 | -0.671 | -3.110 |
| H | -3.263 | -0.552 | -1.339 |
| H | 0.744  | 0.216  | -3.801 |
| H | -0.836 | 0.887  | -4.305 |
| C | -0.695 | 0.482  | -2.170 |
| C | -0.071 | 0.891  | -3.512 |
| H | -2.563 | 1.608  | -2.402 |
| H | 0.332  | 1.912  | -3.425 |
| C | -1.702 | 1.552  | -1.718 |
| H | -2.056 | 1.340  | -0.703 |
| H | -1.200 | 2.531  | -1.712 |
| O | 0.363  | 0.455  | -1.172 |
| H | -3.624 | 0.174  | 0.312  |
| H | -5.166 | 3.548  | 2.506  |
| C | 2.964  | -2.935 | 5.593  |
| H | 1.842  | -6.305 | 2.506  |
| H | -0.099 | 2.595  | 0.350  |
| H | 1.407  | 1.869  | 0.972  |
| H | 0.386  | 2.871  | 2.059  |
| H | 2.148  | -0.043 | 4.290  |
| H | 1.429  | 1.362  | 3.445  |
| H | 3.002  | 0.706  | 2.906  |
| H | -0.857 | -0.705 | 8.180  |
| C | -1.310 | -0.363 | 7.248  |
| H | 0.584  | -0.125 | 6.220  |
| H | -3.341 | -0.484 | 7.998  |
| C | -0.501 | -0.047 | 6.144  |
| C | -2.706 | -0.236 | 7.147  |
| C | -3.289 | 0.206  | 5.949  |
| C | -1.085 | 0.386  | 4.944  |
| H | -4.373 | 0.301  | 5.867  |
| H | -0.471 | 0.663  | 4.093  |
| C | -2.484 | 0.518  | 4.833  |
| H | -2.409 | -6.965 | -1.529 |
| C | -1.821 | -6.493 | -0.740 |
| H | -1.946 | -4.501 | -1.593 |
| H | -1.533 | -8.327 | 0.383  |
| C | -1.559 | -5.113 | -0.777 |
| C | -1.329 | -7.256 | 0.333  |
| C | -0.589 | -6.643 | 1.354  |
| C | -0.805 | -4.503 | 0.233  |
| H | -0.236 | -7.237 | 2.199  |
| H | -0.605 | -3.437 | 0.167  |

|   |        |        |        |
|---|--------|--------|--------|
| C | -0.314 | -5.257 | 1.320  |
| H | 2.346  | -2.373 | 6.312  |
| H | 3.703  | -2.230 | 5.176  |
| H | 3.516  | -3.714 | 6.139  |
| H | -4.454 | 3.006  | -0.658 |
| H | -6.003 | 3.075  | 0.217  |
| H | -5.505 | 1.576  | -0.624 |
| C | 3.699  | -0.107 | -2.602 |
| O | 2.796  | -1.797 | -4.057 |
| C | 2.833  | -1.340 | -2.862 |
| C | 2.217  | -1.992 | -1.764 |
| C | 3.196  | -0.369 | -0.117 |
| H | 1.700  | -2.931 | -1.966 |
| C | 3.385  | 0.620  | -1.281 |
| H | 4.203  | 1.318  | -1.039 |
| H | 2.467  | 1.207  | -1.401 |
| H | 3.610  | 0.572  | -3.466 |
| H | 4.747  | -0.464 | -2.596 |
| C | 2.302  | -2.646 | 0.613  |
| H | 2.862  | 0.153  | 0.786  |
| H | 4.173  | -0.830 | 0.130  |
| H | 2.091  | -2.285 | 1.618  |
| H | 3.326  | -3.061 | 0.613  |
| H | 1.617  | -3.458 | 0.351  |

|                                              | 1         | 2       | 3                           |
|----------------------------------------------|-----------|---------|-----------------------------|
|                                              | A         | A       | A                           |
| Frequencies --                               | -436.7168 | 13.9287 | 19.4402                     |
| Red. masses --                               | 9.1130    | 4.7660  | 3.7134                      |
| Zero-point correction=                       |           |         | 1.300794 (Hartree/Particle) |
| Thermal correction to Energy=                |           |         | 1.374062                    |
| Thermal correction to Enthalpy=              |           |         | 1.375006                    |
| Thermal correction to Gibbs Free Energy=     |           |         | 1.192412                    |
| Sum of electronic and zero-point Energies=   |           |         | -3165.865602                |
| Sum of electronic and thermal Energies=      |           |         | -3165.792334                |
| Sum of electronic and thermal Enthalpies=    |           |         | -3165.791390                |
| Sum of electronic and thermal Free Energies= |           |         | -3165.973984                |

|  | Item          | Value    | Threshold | Converged? |
|--|---------------|----------|-----------|------------|
|  | Maximum Force | 0.000060 | 0.000450  | YES        |
|  | RMS Force     | 0.000009 | 0.000300  | YES        |

---

## Transition State of VI

---

Cartesian coordinates (Angstroms):

---

155

|   |       |         |        |
|---|-------|---------|--------|
| H | 4.586 | -9.825  | -2.482 |
| C | 4.297 | -9.236  | -1.597 |
| H | 5.216 | -8.977  | -1.055 |
| H | 4.354 | -7.302  | -2.571 |
| H | 2.698 | -8.406  | -3.967 |
| C | 3.619 | -7.927  | -2.045 |
| C | 2.382 | -8.128  | -2.948 |
| C | 3.437 | -10.145 | -0.652 |

|   |        |         |        |
|---|--------|---------|--------|
| H | 1.861  | -10.231 | -2.668 |
| H | 1.827  | -7.179  | -3.027 |
| C | 1.439  | -9.242  | -2.444 |
| H | 3.327  | -7.358  | -1.149 |
| H | 0.460  | -9.188  | -2.935 |
| C | 2.165  | -9.513  | -0.127 |
| N | 1.202  | -9.150  | -0.988 |
| N | 2.028  | -9.358  | 1.184  |
| C | -0.045 | -8.496  | -0.526 |
| H | -0.330 | -7.759  | -1.289 |
| H | 0.795  | -6.931  | 0.709  |
| C | 0.826  | -8.790  | 1.808  |
| H | -0.837 | -9.259  | -0.473 |
| C | 0.157  | -7.815  | 0.833  |
| H | 1.142  | -8.284  | 2.729  |
| H | -0.816 | -7.491  | 1.225  |
| H | 0.138  | -9.607  | 2.077  |
| H | 2.868  | -9.571  | 1.790  |
| H | 4.034  | -10.457 | 0.213  |
| H | 3.137  | -11.063 | -1.180 |
| H | 3.402  | -4.800  | -2.880 |
| H | 5.715  | -4.023  | -3.334 |
| H | 1.926  | -5.048  | 0.597  |
| C | 4.029  | -4.458  | -2.054 |
| C | 5.333  | -4.020  | -2.312 |
| H | 6.634  | -1.569  | -3.029 |
| H | 8.817  | -0.576  | -3.704 |
| C | 2.067  | -4.793  | -0.464 |
| C | 7.562  | -1.941  | -2.591 |
| C | 3.509  | -4.435  | -0.746 |
| C | 8.792  | -1.383  | -2.969 |
| H | 1.402  | -3.942  | -0.691 |
| H | 1.734  | -5.641  | -1.081 |
| C | 6.174  | -3.555  | -1.280 |
| C | 7.502  | -2.976  | -1.631 |
| H | 6.775  | -7.424  | -0.876 |
| H | 1.882  | -0.010  | -0.164 |
| C | 9.986  | -1.859  | -2.401 |
| H | 5.534  | -6.282  | -0.303 |
| H | 4.306  | -0.424  | -0.609 |
| H | 10.944 | -1.428  | -2.696 |
| C | 6.527  | -6.691  | -0.085 |
| C | 4.345  | -3.998  | 0.292  |
| C | 8.705  | -3.441  | -1.059 |
| C | 5.662  | -3.595  | 0.039  |
| C | 2.525  | -0.389  | 0.633  |
| C | 9.935  | -2.889  | -1.447 |
| H | 4.423  | -7.796  | 1.117  |
| C | 3.888  | -0.614  | 0.382  |
| H | 7.271  | -5.894  | -0.130 |
| C | 5.365  | -8.165  | 1.527  |
| H | 7.478  | -10.146 | 0.890  |
| H | 8.684  | -4.237  | -0.316 |
| O | 4.241  | -9.943  | 2.647  |
| C | 6.553  | -7.426  | 1.246  |
| H | 3.978  | -3.952  | 1.311  |
| H | 6.435  | -1.053  | 0.099  |
| H | 10.858 | -3.266  | -1.002 |

|   |        |         |        |
|---|--------|---------|--------|
| C | 1.992  | -0.657  | 1.904  |
| C | 5.318  | -9.317  | 2.357  |
| H | 8.605  | -7.936  | 0.754  |
| N | 6.379  | -2.917  | 1.080  |
| C | 4.724  | -1.101  | 1.400  |
| C | 7.747  | -9.630  | 1.828  |
| H | 8.714  | -0.966  | -0.119 |
| C | 6.171  | -1.428  | 1.097  |
| H | 2.541  | -5.940  | 2.821  |
| C | 7.899  | -8.119  | 1.576  |
| H | 10.363 | 0.732   | -0.859 |
| H | 3.445  | -7.463  | 3.066  |
| C | 6.640  | -9.869  | 2.872  |
| C | 8.881  | -0.076  | 0.486  |
| C | 3.119  | -6.535  | 3.546  |
| H | 6.507  | -10.936 | 3.109  |
| C | 9.815  | 0.883   | 0.073  |
| O | 8.843  | -5.333  | 1.433  |
| C | 2.826  | -1.147  | 2.925  |
| H | 8.707  | -10.046 | 2.174  |
| H | 10.745 | -5.588  | 0.735  |
| O | 5.103  | -5.331  | 2.859  |
| B | 6.271  | -6.096  | 2.816  |
| C | 7.332  | -3.323  | 1.931  |
| C | 4.186  | -1.369  | 2.672  |
| B | 7.901  | -4.864  | 2.391  |
| C | 10.190 | -5.716  | 1.678  |
| H | 2.461  | -6.791  | 4.391  |
| H | 8.340  | -7.678  | 2.475  |
| C | 7.189  | -0.950  | 2.163  |
| C | 8.169  | 0.101   | 1.686  |
| C | 4.316  | -5.700  | 4.032  |
| C | 10.041 | 2.029   | 0.856  |
| H | 10.126 | -2.957  | 1.513  |
| H | 3.131  | -3.892  | 3.957  |
| H | 6.896  | -9.334  | 3.802  |
| H | 2.418  | -1.359  | 3.915  |
| H | 10.769 | 2.776   | 0.534  |
| N | 7.860  | -2.238  | 2.544  |
| H | 10.254 | -6.774  | 1.982  |
| H | 4.426  | -8.495  | 4.739  |
| O | 6.419  | -6.847  | 3.997  |
| H | 4.827  | -1.766  | 3.459  |
| C | 3.799  | -4.405  | 4.664  |
| H | 13.667 | -2.412  | 2.660  |
| H | 6.670  | -0.578  | 3.055  |
| H | 10.659 | -5.092  | 2.451  |
| C | 8.398  | 1.245   | 2.468  |
| C | 10.255 | -2.571  | 2.523  |
| C | 9.330  | 2.209   | 2.053  |
| C | 5.351  | -6.513  | 4.926  |
| C | 4.789  | -7.814  | 5.517  |
| O | 8.227  | -4.683  | 3.765  |
| C | 9.113  | -2.181  | 3.232  |
| H | 12.638 | -2.739  | 1.233  |
| C | 12.755 | -2.921  | 2.312  |
| H | 4.631  | -3.732  | 4.903  |
| H | 3.238  | -4.618  | 5.587  |

|   |        |        |       |
|---|--------|--------|-------|
| H | 3.961  | -7.588 | 6.209 |
| C | 11.539 | -2.449 | 3.079 |
| H | 9.173  | -6.532 | 4.080 |
| H | 7.851  | 1.373  | 3.404 |
| H | 9.502  | 3.097  | 2.665 |
| C | 9.072  | -5.534 | 4.528 |
| H | 5.583  | -8.322 | 6.086 |
| H | 6.823  | -2.863 | 4.885 |
| C | 5.968  | -5.678 | 6.062 |
| H | 12.906 | -4.006 | 2.446 |
| H | 10.069 | -5.070 | 4.615 |
| H | 6.471  | -4.789 | 5.666 |
| C | 9.212  | -1.596 | 4.515 |
| C | 6.855  | -1.892 | 5.377 |
| C | 8.032  | -1.119 | 5.279 |
| H | 4.850  | -2.025 | 6.181 |
| C | 5.752  | -1.416 | 6.101 |
| C | 11.648 | -1.876 | 4.361 |
| H | 5.200  | -5.369 | 6.787 |
| H | 8.636  | -5.644 | 5.530 |
| H | 6.713  | -6.294 | 6.588 |
| C | 10.508 | -1.453 | 5.055 |
| C | 8.077  | 0.137  | 5.925 |
| C | 5.803  | -0.162 | 6.732 |
| H | 12.634 | -1.756 | 4.815 |
| C | 6.971  | 0.613  | 6.644 |
| H | 8.978  | 0.746  | 5.839 |
| H | 4.939  | 0.207  | 7.289 |
| H | 10.612 | -1.014 | 6.049 |
| H | 7.019  | 1.591  | 7.127 |
| H | 0.931  | -0.486 | 2.099 |

|                                              |           |         |                             |
|----------------------------------------------|-----------|---------|-----------------------------|
|                                              | 1         | 2       | 3                           |
|                                              | A         | A       | A                           |
| Frequencies --                               | -428.1144 | 18.9897 | 20.5813                     |
| Red. masses --                               | 9.7758    | 4.8919  | 5.0981                      |
| Zero-point correction=                       |           |         | 1.301737 (Hartree/Particle) |
| Thermal correction to Energy=                |           |         | 1.374277                    |
| Thermal correction to Enthalpy=              |           |         | 1.375221                    |
| Thermal correction to Gibbs Free Energy=     |           |         | 1.195115                    |
| Sum of electronic and zero-point Energies=   |           |         | -3165.859718                |
| Sum of electronic and thermal Energies=      |           |         | -3165.787178                |
| Sum of electronic and thermal Enthalpies=    |           |         | -3165.786233                |
| Sum of electronic and thermal Free Energies= |           |         | -3165.966340                |

| Item          | Value    | Threshold | Converged? |
|---------------|----------|-----------|------------|
| Maximum Force | 0.000021 | 0.000450  | YES        |
| RMS Force     | 0.000002 | 0.000300  | YES        |

-----

Finally, computations were carried out on the NHC catalyzed enantioselective silyl conjugate addition to a cyclic enone. The geometry optimized transition state geometries (**VII** (favored) and **VIII** (unfavored)) are depicted in Scheme S12. In **VII** the cyclohexenone molecule approaches the NHC•borosilane complex from beneath the *left* N-aryl group of the NHC. This is in contrast to the substrate approaching from beneath the *right* N-aryl group of the NHC in **V**

(Scheme S11). The reasons for this difference have been discussed in the manuscript. The activation energy of forming transition state **VII** is 19.0 kcal/mol. However, forming TS **VIII** requires a higher activation barrier ( $\Delta G^\ddagger = 20.6$  kcal/mol), which may be due to the steric repulsion between the  $\text{SiMe}_2\text{Ph}$  unit and the N-aryl motif of the NHC. The larger N–C–N angle ( $129^\circ$  vs  $123^\circ$  in **VII**) may also be the result of this steric interaction.

**Scheme S12.** The transition state of the C–Si bond formation in a chiral NHC catalyzed SCA reaction to a cyclic enone

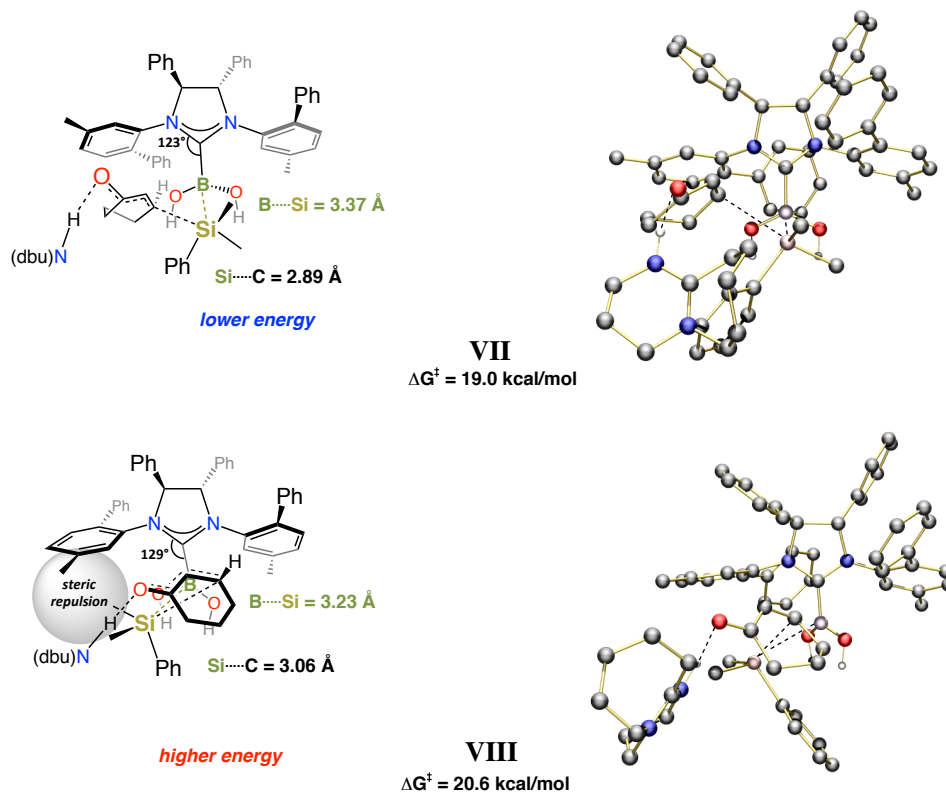

### Ground State of VII and VIII

Cartesian coordinates (Angstroms):

145

|   |        |        |        |
|---|--------|--------|--------|
| H | -5.151 | -0.058 | 1.771  |
| O | -3.637 | 0.697  | 2.665  |
| H | -4.726 | 3.018  | 2.291  |
| C | -3.160 | 1.592  | 1.931  |
| C | -4.012 | 2.778  | 1.489  |
| H | -4.599 | 2.430  | 0.619  |
| C | -1.818 | 1.481  | 1.370  |
| C | -3.164 | 3.996  | 1.070  |
| H | -2.646 | 4.393  | 1.959  |
| H | -3.814 | 4.793  | 0.680  |
| C | -1.371 | 2.348  | 0.422  |
| C | -2.113 | 3.587  | 0.020  |
| H | -2.593 | 3.393  | -0.956 |
| H | -1.383 | 4.395  | -0.155 |
| H | -1.232 | 0.610  | 1.656  |
| H | -0.440 | 2.150  | -0.114 |

|    |        |        |        |
|----|--------|--------|--------|
| C  | -1.244 | -1.922 | -2.127 |
| H  | -1.345 | -1.987 | -1.036 |
| H  | -2.240 | -2.088 | -2.576 |
| H  | -0.589 | -2.750 | -2.434 |
| Si | -0.553 | -0.246 | -2.764 |
| C  | -2.090 | 0.920  | -2.733 |
| C  | -3.201 | 0.673  | -1.892 |
| H  | -3.177 | -0.182 | -1.217 |
| C  | -4.339 | 1.493  | -1.906 |
| H  | -5.187 | 1.258  | -1.260 |
| C  | -4.391 | 2.615  | -2.752 |
| H  | -5.274 | 3.257  | -2.762 |
| C  | -3.295 | 2.901  | -3.582 |
| H  | -3.322 | 3.770  | -4.244 |
| C  | -2.169 | 2.058  | -3.574 |
| C  | -0.212 | -0.544 | -4.630 |
| H  | -1.056 | -1.054 | -5.125 |
| H  | -0.023 | 0.404  | -5.161 |
| H  | -1.343 | 2.280  | -4.256 |
| H  | 0.691  | -1.165 | -4.748 |
| H  | -0.076 | 2.478  | -2.357 |
| O  | 0.753  | 2.277  | -1.897 |
| B  | 1.108  | 0.847  | -2.024 |
| C  | 1.772  | 0.400  | -0.519 |
| H  | 3.862  | 5.391  | -1.053 |
| C  | 3.193  | 4.817  | -0.410 |
| H  | 2.356  | 6.579  | 0.521  |
| C  | 2.093  | -3.453 | -2.774 |
| C  | 2.344  | 5.488  | 0.479  |
| C  | 3.233  | 3.409  | -0.490 |
| O  | 2.187  | 0.616  | -3.014 |
| H  | 2.678  | -1.374 | -2.547 |
| C  | 2.205  | -2.238 | -2.079 |
| H  | 1.418  | -5.507 | -2.626 |
| C  | 1.495  | -4.544 | -2.117 |
| C  | 2.352  | 2.688  | 0.353  |
| C  | 1.487  | 4.767  | 1.327  |
| N  | 2.316  | 1.248  | 0.383  |
| C  | 1.510  | 3.365  | 1.246  |
| C  | 1.683  | -2.087 | -0.787 |
| H  | 2.846  | 1.323  | -2.896 |
| N  | 1.941  | -0.868 | -0.075 |
| H  | 0.846  | 2.786  | 1.883  |
| C  | 0.987  | -4.399 | -0.822 |
| C  | 1.047  | -3.171 | -0.131 |
| H  | 0.496  | -5.243 | -0.335 |
| C  | 2.983  | 0.542  | 1.537  |
| C  | 2.713  | -0.952 | 1.206  |
| H  | 2.072  | -1.399 | 1.973  |
| H  | 4.058  | 0.756  | 1.474  |
| C  | 0.551  | 5.453  | 2.300  |
| C  | 2.606  | -3.568 | -4.193 |
| H  | 5.722  | -4.206 | 2.735  |
| H  | 3.620  | -2.865 | 2.909  |
| C  | 5.473  | -3.480 | 1.959  |
| C  | 4.293  | -2.725 | 2.060  |
| H  | 7.239  | -3.898 | 0.773  |
| C  | 6.326  | -3.307 | 0.856  |

|   |        |        |        |
|---|--------|--------|--------|
| C | 3.968  | -1.787 | 1.067  |
| C | 5.994  | -2.377 | -0.146 |
| C | 4.821  | -1.620 | -0.040 |
| H | 6.646  | -2.249 | -1.012 |
| H | 4.551  | -0.910 | -0.821 |
| H | 3.391  | 3.175  | 5.387  |
| H | 4.245  | 2.225  | 3.243  |
| C | 2.781  | 2.467  | 4.825  |
| C | 3.266  | 1.927  | 3.624  |
| H | 1.128  | 2.525  | 6.226  |
| C | 1.509  | 2.102  | 5.295  |
| C | 2.489  | 1.016  | 2.888  |
| C | 0.731  | 1.185  | 4.567  |
| C | 1.222  | 0.646  | 3.371  |
| H | -0.258 | 0.893  | 4.925  |
| H | 0.612  | -0.053 | 2.805  |
| H | 0.616  | 4.991  | 3.298  |
| H | -0.498 | 5.366  | 1.968  |
| H | 0.788  | 6.524  | 2.393  |
| H | 2.841  | -4.612 | -4.450 |
| H | 3.508  | -2.954 | -4.339 |
| H | 1.848  | -3.209 | -4.910 |
| H | 4.976  | 3.085  | -4.802 |
| H | 3.460  | 4.067  | -3.085 |
| C | 4.152  | 3.269  | -2.811 |
| C | 4.997  | 2.705  | -3.779 |
| C | 4.142  | 2.782  | -1.483 |
| C | 5.852  | 1.645  | -3.436 |
| H | 6.504  | 1.199  | -4.189 |
| C | 5.020  | 1.730  | -1.151 |
| C | 5.863  | 1.164  | -2.117 |
| H | 5.067  | 1.367  | -0.127 |
| H | 6.535  | 0.352  | -1.833 |
| H | 0.218  | -4.803 | 4.169  |
| H | 1.329  | -4.894 | 1.941  |
| C | 0.640  | -4.081 | 2.176  |
| C | 0.018  | -4.024 | 3.431  |
| C | 0.409  | -3.079 | 1.207  |
| C | -0.853 | -2.966 | 3.741  |
| H | -1.336 | -2.920 | 4.719  |
| C | -0.467 | -2.021 | 1.533  |
| C | -1.095 | -1.966 | 2.787  |
| H | -0.649 | -1.240 | 0.796  |
| H | -1.771 | -1.140 | 3.018  |
| H | -5.051 | -5.278 | 1.453  |
| H | -6.016 | -3.805 | 1.350  |
| H | -3.869 | -3.377 | 2.468  |
| H | -8.127 | -1.802 | 0.824  |
| C | -5.109 | -4.296 | 0.960  |
| H | -7.476 | 0.403  | 1.698  |
| C | -3.880 | -3.461 | 1.372  |
| C | -7.907 | -1.015 | 0.087  |
| C | -7.050 | 0.074  | 0.742  |
| N | -5.712 | -0.473 | 1.017  |
| H | -8.856 | -0.587 | -0.260 |
| H | -6.255 | -4.996 | -0.736 |
| C | -5.281 | -4.515 | -0.558 |
| H | -3.398 | -1.319 | 1.500  |



|   |        |        |        |
|---|--------|--------|--------|
| C | -3.825 | -2.015 | 0.773  |
| H | -2.953 | -3.974 | 1.080  |
| C | -5.168 | -1.485 | 0.338  |
| H | -4.504 | -5.199 | -0.936 |
| C | -7.156 | -1.625 | -1.103 |
| H | -7.679 | -2.515 | -1.475 |
| N | -5.794 | -2.050 | -0.699 |
| H | -6.959 | 0.952  | 0.083  |
| C | -5.187 | -3.212 | -1.391 |
| H | -3.163 | -2.008 | -0.101 |
| H | -7.065 | -0.905 | -1.931 |
| H | -4.143 | -2.971 | -1.623 |
| H | -5.711 | -3.316 | -2.349 |

|                                              | 1       | 2            | 3                  |
|----------------------------------------------|---------|--------------|--------------------|
|                                              | A       | A            | A                  |
| Frequencies --                               | 14.8637 | 21.8550      | 24.4984            |
| Red. masses --                               | 5.4974  | 4.9285       | 4.2487             |
| Zero-point correction=                       |         | 1.202599     | (Hartree/Particle) |
| Thermal correction to Energy=                |         | 1.273168     |                    |
| Thermal correction to Enthalpy=              |         | 1.274112     |                    |
| Thermal correction to Gibbs Free Energy=     |         | 1.094801     |                    |
| Sum of electronic and zero-point Energies=   |         | -3237.884351 |                    |
| Sum of electronic and thermal Energies=      |         | -3237.813782 |                    |
| Sum of electronic and thermal Enthalpies=    |         | -3237.812838 |                    |
| Sum of electronic and thermal Free Energies= |         | -3237.992150 |                    |

| Item          | Value    | Threshold | Converged? |
|---------------|----------|-----------|------------|
| Maximum Force | 0.000000 | 0.000450  | YES        |
| RMS Force     | 0.000000 | 0.000300  | YES        |

## Transition State of VII

Cartesian coordinates (Angstroms):

145

|   |        |        |        |
|---|--------|--------|--------|
| H | -5.626 | 0.232  | 1.755  |
| O | -4.060 | 0.103  | 2.382  |
| H | -4.421 | 2.605  | 1.868  |
| C | -3.271 | 0.808  | 1.669  |
| C | -3.757 | 2.151  | 1.114  |
| H | -4.367 | 1.956  | 0.216  |
| C | -1.929 | 0.409  | 1.392  |
| C | -2.592 | 3.089  | 0.747  |
| H | -2.081 | 3.408  | 1.671  |
| H | -2.973 | 3.995  | 0.248  |
| C | -1.117 | 1.070  | 0.475  |
| C | -1.581 | 2.363  | -0.166 |
| H | -2.068 | 2.160  | -1.133 |
| H | -0.714 | 3.000  | -0.378 |
| H | -1.574 | -0.493 | 1.893  |
| H | -0.058 | 0.847  | 0.450  |
| C | -2.192 | -2.290 | -0.615 |
| H | -2.584 | -1.924 | 0.347  |
| H | -3.043 | -2.697 | -1.192 |

|    |        |        |        |
|----|--------|--------|--------|
| H  | -1.499 | -3.119 | -0.405 |
| Si | -1.329 | -0.894 | -1.640 |
| C  | -2.790 | 0.104  | -2.357 |
| C  | -4.048 | 0.122  | -1.704 |
| H  | -4.192 | -0.493 | -0.816 |
| C  | -5.109 | 0.921  | -2.158 |
| H  | -6.067 | 0.901  | -1.634 |
| C  | -4.943 | 1.744  | -3.285 |
| H  | -5.765 | 2.368  | -3.640 |
| C  | -3.705 | 1.750  | -3.953 |
| H  | -3.564 | 2.381  | -4.834 |
| C  | -2.653 | 0.944  | -3.491 |
| C  | -0.629 | -1.840 | -3.195 |
| H  | -1.339 | -2.634 | -3.491 |
| H  | -0.513 | -1.172 | -4.067 |
| H  | -1.703 | 0.962  | -4.037 |
| H  | 0.349  | -2.304 | -2.997 |
| H  | 0.257  | 1.936  | -2.856 |
| O  | 0.852  | 1.906  | -2.088 |
| B  | 1.595  | 0.745  | -2.021 |
| C  | 2.375  | 0.486  | -0.634 |
| H  | 3.294  | 5.511  | -1.464 |
| C  | 2.731  | 4.923  | -0.738 |
| H  | 1.682  | 6.636  | 0.059  |
| C  | 4.739  | -2.466 | -2.990 |
| C  | 1.827  | 5.556  | 0.125  |
| C  | 2.966  | 3.537  | -0.669 |
| O  | 1.879  | -0.099 | -3.066 |
| H  | 4.472  | -0.410 | -2.370 |
| C  | 4.218  | -1.451 | -2.176 |
| H  | 4.840  | -4.613 | -3.267 |
| C  | 4.432  | -3.801 | -2.661 |
| C  | 2.212  | 2.795  | 0.272  |
| C  | 1.108  | 4.817  | 1.084  |
| N  | 2.379  | 1.376  | 0.390  |
| C  | 1.309  | 3.428  | 1.137  |
| C  | 3.377  | -1.747 | -1.093 |
| H  | 1.300  | 0.040  | -3.834 |
| N  | 2.979  | -0.661 | -0.252 |
| H  | 0.734  | 2.823  | 1.834  |
| C  | 3.616  | -4.098 | -1.565 |
| C  | 3.058  | -3.085 | -0.756 |
| H  | 3.381  | -5.137 | -1.329 |
| C  | 3.119  | 0.843  | 1.580  |
| C  | 3.316  | -0.650 | 1.208  |
| H  | 2.564  | -1.253 | 1.728  |
| H  | 4.089  | 1.362  | 1.617  |
| C  | 0.106  | 5.479  | 2.006  |
| C  | 5.605  | -2.123 | -4.184 |
| H  | 6.196  | -3.338 | 3.731  |
| H  | 3.939  | -2.454 | 3.121  |
| C  | 6.093  | -2.623 | 2.913  |
| C  | 4.825  | -2.123 | 2.578  |
| H  | 8.209  | -2.605 | 2.443  |
| C  | 7.224  | -2.211 | 2.189  |
| C  | 4.685  | -1.201 | 1.527  |
| C  | 7.084  | -1.295 | 1.132  |
| C  | 5.819  | -0.789 | 0.805  |

|   |        |        |        |
|---|--------|--------|--------|
| H | 7.958  | -0.979 | 0.560  |
| H | 5.703  | -0.091 | -0.022 |
| H | 2.534  | 2.966  | 5.717  |
| H | 3.829  | 2.468  | 3.639  |
| C | 2.139  | 2.260  | 4.985  |
| C | 2.872  | 1.975  | 3.822  |
| H | 0.319  | 1.872  | 6.097  |
| C | 0.895  | 1.644  | 5.199  |
| C | 2.370  | 1.069  | 2.874  |
| C | 0.391  | 0.733  | 4.253  |
| C | 1.130  | 0.443  | 3.099  |
| H | -0.578 | 0.257  | 4.407  |
| H | 0.727  | -0.251 | 2.361  |
| H | 0.015  | 4.926  | 2.953  |
| H | -0.894 | 5.506  | 1.540  |
| H | 0.397  | 6.517  | 2.229  |
| H | 6.331  | -2.924 | -4.394 |
| H | 6.152  | -1.183 | -4.019 |
| H | 4.986  | -1.990 | -5.088 |
| H | 4.603  | 2.407  | -4.903 |
| H | 2.893  | 3.396  | -3.374 |
| C | 3.800  | 2.947  | -2.968 |
| C | 4.759  | 2.383  | -3.823 |
| C | 3.976  | 2.913  | -1.570 |
| C | 5.916  | 1.790  | -3.292 |
| H | 6.666  | 1.358  | -3.956 |
| C | 5.143  | 2.318  | -1.046 |
| C | 6.107  | 1.763  | -1.900 |
| H | 5.306  | 2.315  | 0.033  |
| H | 7.010  | 1.316  | -1.480 |
| H | 2.188  | -5.592 | 3.084  |
| H | 3.568  | -4.980 | 1.103  |
| C | 2.620  | -4.473 | 1.285  |
| C | 1.846  | -4.807 | 2.406  |
| C | 2.206  | -3.450 | 0.403  |
| C | 0.647  | -4.123 | 2.665  |
| H | 0.047  | -4.378 | 3.541  |
| C | 0.992  | -2.781 | 0.664  |
| C | 0.221  | -3.112 | 1.787  |
| H | 0.659  | -1.988 | -0.009 |
| H | -0.720 | -2.591 | 1.965  |
| H | -8.448 | -4.233 | 1.694  |
| H | -8.459 | -2.470 | 1.747  |
| H | -6.247 | -3.379 | 2.315  |
| H | -9.194 | 0.476  | 1.578  |
| C | -8.075 | -3.334 | 1.180  |
| H | -7.259 | 1.943  | 2.037  |
| C | -6.534 | -3.326 | 1.254  |
| C | -8.759 | 1.026  | 0.730  |
| C | -7.319 | 1.427  | 1.070  |
| N | -6.494 | 0.217  | 1.160  |
| H | -9.370 | 1.919  | 0.544  |
| H | -9.754 | -3.126 | -0.171 |
| C | -8.668 | -3.295 | -0.245 |
| H | -4.976 | -1.770 | 1.243  |
| C | -5.827 | -2.076 | 0.623  |
| H | -6.131 | -4.225 | 0.763  |
| C | -6.735 | -0.880 | 0.450  |

|   |        |        |        |
|---|--------|--------|--------|
| H | -8.522 | -4.263 | -0.750 |
| C | -8.764 | 0.137  | -0.520 |
| H | -9.748 | -0.333 | -0.656 |
| N | -7.768 | -0.954 | -0.404 |
| H | -6.904 | 2.095  | 0.297  |
| C | -8.034 | -2.207 | -1.143 |
| H | -5.420 | -2.332 | -0.365 |
| H | -8.535 | 0.722  | -1.425 |
| H | -7.091 | -2.559 | -1.578 |
| H | -8.696 | -1.949 | -1.979 |

|                                              | 1        | 2       | 3                           |
|----------------------------------------------|----------|---------|-----------------------------|
|                                              | A        | A       | A                           |
| Frequencies --                               | -87.1398 | 12.7987 | 16.3093                     |
| Red. masses --                               | 6.0834   | 5.2748  | 5.2315                      |
| Zero-point correction=                       |          |         | 1.200175 (Hartree/Particle) |
| Thermal correction to Energy=                |          |         | 1.270579                    |
| Thermal correction to Enthalpy=              |          |         | 1.271524                    |
| Thermal correction to Gibbs Free Energy=     |          |         | 1.090060                    |
| Sum of electronic and zero-point Energies=   |          |         | -3237.851811                |
| Sum of electronic and thermal Energies=      |          |         | -3237.781407                |
| Sum of electronic and thermal Enthalpies=    |          |         | -3237.780463                |
| Sum of electronic and thermal Free Energies= |          |         | -3237.961926                |

| Item          | Value    | Threshold | Converged? |
|---------------|----------|-----------|------------|
| Maximum Force | 0.000003 | 0.000450  | YES        |
| RMS Force     | 0.000000 | 0.000300  | YES        |

### Transition State of VIII

-----  
 Cartesian coordinates (Angstroms):  
 -----

145

|   |        |        |       |
|---|--------|--------|-------|
| H | 9.613  | 3.082  | 6.257 |
| H | 9.203  | 1.864  | 5.050 |
| H | 9.265  | -0.495 | 3.174 |
| C | 9.518  | 2.914  | 5.174 |
| H | 11.564 | 2.284  | 4.848 |
| H | 7.489  | 3.635  | 5.206 |
| C | 10.902 | 3.101  | 4.518 |
| C | 9.402  | -0.269 | 2.106 |
| H | 9.766  | -1.175 | 1.603 |
| C | 8.404  | 3.832  | 4.628 |
| H | 7.254  | -0.530 | 1.725 |
| H | 11.359 | 4.047  | 4.851 |
| H | 11.337 | 0.636  | 2.539 |
| C | 8.064  | 0.177  | 1.504 |
| C | 10.438 | 0.852  | 1.945 |
| N | 7.690  | 1.474  | 2.080 |
| H | 8.675  | 4.886  | 4.797 |
| C | 8.576  | 2.365  | 2.505 |
| N | 9.897  | 2.149  | 2.419 |
| C | 8.062  | 3.654  | 3.107 |
| C | 10.849 | 3.136  | 2.973 |
| H | 6.974  | 3.681  | 2.960 |
| H | 8.142  | 0.273  | 0.408 |

|    |        |        |        |
|----|--------|--------|--------|
| H  | 11.831 | 2.912  | 2.537  |
| H  | 10.739 | 0.963  | 0.892  |
| H  | 10.560 | 4.134  | 2.618  |
| H  | 8.486  | 4.485  | 2.523  |
| H  | 4.315  | -0.658 | -6.281 |
| H  | 2.753  | -2.479 | -5.555 |
| C  | 4.113  | -0.821 | -5.220 |
| C  | 3.226  | -1.833 | -4.812 |
| C  | 4.755  | -0.040 | -4.244 |
| H  | 5.472  | 0.728  | -4.544 |
| C  | 2.968  | -2.034 | -3.445 |
| H  | 2.350  | -2.888 | -3.153 |
| H  | 4.587  | 3.289  | -1.815 |
| H  | 5.523  | 1.501  | -0.326 |
| C  | 4.481  | -0.244 | -2.882 |
| C  | 3.562  | -1.230 | -2.430 |
| H  | 3.099  | 1.394  | -1.871 |
| H  | 1.256  | 0.035  | -3.034 |
| C  | 4.089  | 3.056  | -0.860 |
| C  | 5.085  | 2.412  | 0.123  |
| H  | 5.920  | 3.093  | 0.347  |
| H  | 0.498  | -2.205 | -2.843 |
| C  | 2.862  | 2.153  | -1.114 |
| H  | 5.006  | 0.371  | -2.146 |
| O  | 0.549  | 0.338  | -2.433 |
| H  | 2.062  | 2.760  | -1.564 |
| H  | 3.748  | 4.012  | -0.428 |
| H  | 1.548  | -3.485 | -0.873 |
| O  | -0.053 | -2.021 | -2.061 |
| B  | 0.039  | -0.705 | -1.685 |
| C  | 4.402  | 2.010  | 1.430  |
| H  | 6.670  | 1.698  | 2.230  |
| Si | 3.004  | -1.390 | -0.600 |
| C  | 2.542  | -3.268 | -0.457 |
| C  | 2.348  | 1.500  | 0.153  |
| H  | 3.287  | -3.894 | -0.983 |
| O  | 5.055  | 2.001  | 2.524  |
| C  | 3.034  | 1.606  | 1.355  |
| H  | 5.411  | -0.686 | -0.089 |
| H  | 1.306  | 1.196  | 0.170  |
| H  | 2.525  | -3.570 | 0.600  |
| C  | 4.613  | -1.206 | 0.468  |
| H  | 4.999  | -2.201 | 0.754  |
| H  | 2.576  | 1.273  | 2.287  |
| H  | 4.432  | -0.629 | 1.389  |
| C  | -0.878 | -0.231 | -0.439 |
| H  | -0.298 | -5.101 | 1.807  |
| C  | 0.059  | -4.077 | 1.926  |
| H  | 1.576  | -4.627 | 3.361  |
| C  | -3.505 | 0.567  | -3.875 |
| C  | 1.117  | -3.808 | 2.802  |
| C  | -0.588 | -3.056 | 1.197  |
| H  | -2.758 | -0.839 | -2.404 |
| C  | -2.844 | 0.211  | -2.690 |
| H  | -4.207 | 2.243  | -5.055 |
| C  | -3.671 | 1.939  | -4.154 |
| C  | -0.112 | -1.735 | 1.399  |
| C  | 1.612  | -2.501 | 2.956  |

|   |        |        |        |
|---|--------|--------|--------|
| N | -0.796 | -0.604 | 0.845  |
| C | 0.979  | -1.474 | 2.239  |
| C | -2.323 | 1.194  | -1.833 |
| N | -1.769 | 0.766  | -0.586 |
| H | 1.325  | -0.450 | 2.341  |
| C | -3.153 | 2.916  | -3.296 |
| C | -2.445 | 2.570  | -2.127 |
| H | -3.265 | 3.974  | -3.542 |
| C | -1.721 | 0.202  | 1.720  |
| C | -2.291 | 1.258  | 0.727  |
| H | -1.832 | 2.235  | 0.918  |
| H | -2.517 | -0.472 | 2.065  |
| C | 2.805  | -2.189 | 3.832  |
| C | -4.039 | -0.497 | -4.810 |
| H | -6.144 | 3.576  | 2.004  |
| H | -3.667 | 3.307  | 1.813  |
| C | -5.728 | 2.697  | 1.509  |
| C | -4.336 | 2.545  | 1.408  |
| H | -7.664 | 1.844  | 1.034  |
| C | -6.581 | 1.724  | 0.964  |
| C | -3.792 | 1.415  | 0.776  |
| C | -6.039 | 0.597  | 0.320  |
| C | -4.650 | 0.441  | 0.231  |
| H | -6.698 | -0.156 | -0.116 |
| H | -4.228 | -0.421 | -0.283 |
| H | -0.663 | 0.153  | 6.277  |
| H | -1.906 | -0.663 | 4.273  |
| C | -0.505 | 0.629  | 5.309  |
| C | -1.210 | 0.173  | 4.184  |
| H | 0.957  | 2.046  | 6.054  |
| C | 0.403  | 1.693  | 5.183  |
| C | -1.015 | 0.777  | 2.929  |
| C | 0.598  | 2.301  | 3.931  |
| C | -0.107 | 1.846  | 2.809  |
| H | 1.309  | 3.122  | 3.822  |
| H | 0.075  | 2.310  | 1.840  |
| H | 3.001  | -3.005 | 4.545  |
| H | 2.648  | -1.256 | 4.396  |
| H | 3.709  | -2.051 | 3.214  |
| H | -3.377 | -0.616 | -5.685 |
| H | -5.037 | -0.228 | -5.190 |
| H | -4.105 | -1.473 | -4.304 |
| H | -2.200 | -5.648 | -2.317 |
| H | -0.467 | -4.976 | -0.662 |
| C | -1.434 | -4.473 | -0.674 |
| C | -2.407 | -4.839 | -1.613 |
| C | -1.666 | -3.420 | 0.239  |
| C | -3.637 | -4.163 | -1.657 |
| H | -4.396 | -4.445 | -2.390 |
| C | -2.913 | -2.765 | 0.199  |
| C | -3.890 | -3.130 | -0.740 |
| H | -3.145 | -1.991 | 0.927  |
| H | -4.854 | -2.618 | -0.742 |
| H | -2.517 | 6.517  | 0.398  |
| H | -3.593 | 4.841  | -1.105 |
| C | -2.548 | 4.725  | -0.813 |
| C | -1.942 | 5.660  | 0.042  |
| C | -1.823 | 3.605  | -1.266 |

|   |        |       |        |
|---|--------|-------|--------|
| C | -0.609 | 5.488 | 0.452  |
| H | -0.147 | 6.212 | 1.126  |
| C | -0.478 | 3.452 | -0.864 |
| C | 0.126  | 4.381 | -0.008 |
| H | 0.072  | 2.584 | -1.222 |
| H | 1.163  | 4.235 | 0.300  |

|                                              |          |              |                    |
|----------------------------------------------|----------|--------------|--------------------|
|                                              | 1        | 2            | 3                  |
|                                              | A        | A            | A                  |
| Frequencies --                               | -81.1664 | 8.0797       | 11.4952            |
| Red. masses --                               | 5.8588   | 4.5796       | 5.3125             |
| Zero-point correction=                       |          | 1.199457     | (Hartree/Particle) |
| Thermal correction to Energy=                |          | 1.270430     |                    |
| Thermal correction to Enthalpy=              |          | 1.271374     |                    |
| Thermal correction to Gibbs Free Energy=     |          | 1.085323     |                    |
| Sum of electronic and zero-point Energies=   |          | -3237.845123 |                    |
| Sum of electronic and thermal Energies=      |          | -3237.774149 |                    |
| Sum of electronic and thermal Enthalpies=    |          | -3237.773205 |                    |
| Sum of electronic and thermal Free Energies= |          | -3237.959257 |                    |

| Item          | Value    | Threshold | Converged? |
|---------------|----------|-----------|------------|
| Maximum Force | 0.000003 | 0.000450  | YES        |
| RMS Force     | 0.000001 | 0.000300  | YES        |

### ■ Computational Analysis of a Doubly Coordinated Diboron Complex

Density Functional Theory (DFT) calculations were carried out to study the probability of a methoxide coordination to the NHC•diboron complex. Two ground states (**B** and **C**, Scheme S13) were optimized using the B97-D functional and 6-31G\* basis set, with tetrahydrofuran solvation modeled using the PCM model. Ethylene glycol was employed instead of pinacol to simplify the calculations. Ground state **C**, which includes the methoxide coordination to the NHC•diboron complex, is 20.2 kcal/mol higher in energy than ground state **B** (involving a mono-coordinated diboron complex). In addition, we cannot find any low-energy transition state about the reaction between the bis-coordinated diboron and enones. Thus, we consider bis-coordinated diboron **C** not an active species in the NHC-catalyzed boryl conjugate additions.

**Scheme S13.** Ground states of mono-coordinated diboron (**B**) and bis-coordinated diboron (**C**)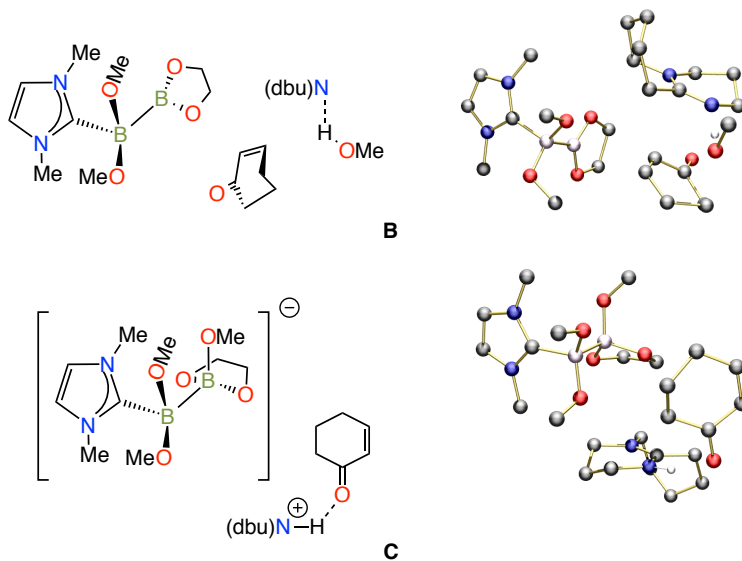

$$\Delta\Delta G(\mathbf{C} - \mathbf{B}) = 20.2 \text{ kcal/mol}$$

### Ground State of B

-----  
 Cartesian coordinates (Angstroms):  
 -----

83

|   |        |        |        |
|---|--------|--------|--------|
| O | 1.476  | 0.918  | -1.379 |
| B | 0.422  | 1.786  | -1.084 |
| H | 3.107  | 1.411  | -2.585 |
| C | 2.020  | 1.266  | -2.680 |
| H | 1.816  | 0.443  | -3.381 |
| O | 0.283  | 2.778  | -2.055 |
| C | 1.271  | 2.562  | -3.095 |
| H | 1.934  | 3.440  | -3.143 |
| H | 0.753  | 2.447  | -4.059 |
| H | -1.676 | -4.809 | -4.512 |
| C | -1.133 | -3.994 | -4.005 |
| H | -3.504 | -3.612 | -2.542 |
| N | -1.785 | -3.737 | -2.720 |
| H | 0.446  | -5.301 | -3.300 |
| C | 0.355  | -4.349 | -3.848 |
| H | -1.949 | -4.690 | 0.837  |
| H | -1.223 | -3.100 | -4.649 |
| H | 0.843  | -4.465 | -4.828 |
| H | 0.189  | -5.077 | -0.266 |
| C | -1.259 | -3.835 | 0.747  |
| C | -1.063 | -3.222 | -1.759 |
| H | -2.818 | -3.042 | -0.582 |
| C | -1.738 | -2.927 | -0.430 |
| C | 0.170  | -4.403 | 0.606  |
| H | 0.398  | -5.023 | 1.488  |
| C | 1.046  | -3.234 | -3.054 |
| N | 0.274  | -2.919 | -1.842 |
| H | -1.339 | -3.260 | 1.686  |



|   |        |        |        |
|---|--------|--------|--------|
| H | 2.055  | -3.545 | -2.743 |
| H | 1.139  | -2.326 | -3.675 |
| H | -1.559 | -1.874 | -0.176 |
| C | 1.285  | -3.352 | 0.429  |
| C | 0.993  | -2.330 | -0.703 |
| H | 2.229  | -3.882 | 0.220  |
| H | 0.416  | -1.481 | -0.318 |
| H | 1.431  | -2.791 | 1.367  |
| H | 1.928  | -1.906 | -1.092 |
| H | -4.306 | -0.993 | -2.546 |
| C | -3.629 | -0.383 | -3.164 |
| H | -2.284 | -0.142 | -1.389 |
| H | -4.081 | 0.627  | -3.228 |
| O | -0.939 | 0.299  | 0.644  |
| H | -4.439 | -0.901 | -5.126 |
| H | -3.305 | -2.084 | -4.443 |
| C | -2.297 | -0.272 | -2.473 |
| C | -3.496 | -1.008 | -4.568 |
| C | -1.725 | 0.096  | 1.810  |
| B | -0.510 | 1.710  | 0.408  |
| C | -1.108 | -0.331 | -3.121 |
| C | -2.334 | -0.369 | -5.357 |
| H | -0.176 | -0.313 | -2.562 |
| C | -4.812 | -4.795 | -1.716 |
| O | -4.496 | -3.567 | -2.354 |
| H | -2.555 | 0.701  | -5.534 |
| C | -1.012 | -0.427 | -4.583 |
| H | -2.189 | -0.839 | -6.341 |
| O | 0.081  | -0.501 | -5.169 |
| C | 0.620  | 2.218  | 1.530  |
| C | 0.387  | 4.682  | 1.069  |
| C | 1.578  | 0.016  | 2.294  |
| N | 0.999  | 3.516  | 1.724  |
| N | 1.522  | 1.482  | 2.238  |
| C | 2.440  | 2.303  | 2.881  |
| C | 2.110  | 3.587  | 2.554  |
| H | 0.298  | 4.479  | -0.004 |
| H | 1.041  | 5.546  | 1.244  |
| H | -0.611 | 4.863  | 1.480  |
| H | 2.557  | 4.535  | 2.828  |
| H | 3.232  | 1.900  | 3.501  |
| H | 1.274  | -0.330 | 3.293  |
| H | 2.609  | -0.306 | 2.091  |
| H | 0.895  | -0.372 | 1.535  |
| C | -2.641 | 2.542  | -0.443 |
| O | -1.620 | 2.679  | 0.524  |
| H | -4.263 | -4.932 | -0.760 |
| H | -4.590 | -5.676 | -2.356 |
| H | -5.891 | -4.801 | -1.491 |
| H | -3.314 | 3.416  | -0.373 |
| H | -3.249 | 1.629  | -0.277 |
| H | -2.235 | 2.489  | -1.471 |
| H | -1.993 | -0.972 | 1.867  |
| H | -2.649 | 0.700  | 1.789  |
| H | -1.168 | 0.369  | 2.730  |

|                                              |         |                            |         |
|----------------------------------------------|---------|----------------------------|---------|
|                                              | A       | A                          | A       |
| Frequencies --                               | 16.5166 | 22.8540                    | 26.6261 |
| Red. masses --                               | 4.4560  | 4.4344                     | 4.4417  |
| Zero-point correction=                       |         | 0.705267(Hartree/Particle) |         |
| Thermal correction to Energy=                |         | 0.748325                   |         |
| Thermal correction to Enthalpy=              |         | 0.749269                   |         |
| Thermal correction to Gibbs Free Energy=     |         | 0.625196                   |         |
| Sum of electronic and zero-point Energies=   |         | -1698.710368               |         |
| Sum of electronic and thermal Energies=      |         | -1698.667310               |         |
| Sum of electronic and thermal Enthalpies=    |         | -1698.666366               |         |
| Sum of electronic and thermal Free Energies= |         | -1698.790439               |         |

| Item          | Value    | Threshold | Converged? |
|---------------|----------|-----------|------------|
| Maximum Force | 0.000041 | 0.000450  | YES        |
| RMS Force     | 0.000005 | 0.000300  | YES        |

---

### Ground State of C

---

Cartesian coordinates (Angstroms):

---

83

|   |        |        |        |
|---|--------|--------|--------|
| H | 0.510  | 1.558  | 1.940  |
| C | 1.480  | 1.150  | 1.591  |
| H | 1.600  | 0.150  | 2.062  |
| O | 1.565  | 1.096  | 0.189  |
| H | 2.289  | 1.805  | 1.977  |
| H | -3.464 | -2.559 | -2.969 |
| C | -2.378 | -2.428 | -2.866 |
| H | -2.390 | -3.963 | -1.342 |
| N | -1.862 | -3.612 | -2.162 |
| H | -2.014 | -3.155 | -4.884 |
| C | -1.693 | -2.328 | -4.232 |
| H | -1.061 | -7.234 | -2.345 |
| H | -2.180 | -1.528 | -2.258 |
| H | -1.966 | -1.381 | -4.716 |
| H | -0.852 | -5.866 | -4.368 |
| C | -0.141 | -6.647 | -2.480 |
| C | -0.654 | -4.127 | -2.369 |
| H | -0.969 | -5.511 | -0.783 |
| C | -0.245 | -5.359 | -1.593 |
| C | 0.041  | -6.393 | -3.992 |
| H | 0.072  | -7.363 | -4.512 |
| C | -0.174 | -2.385 | -4.032 |
| N | 0.188  | -3.607 | -3.273 |
| H | 0.693  | -7.256 | -2.099 |
| H | 0.348  | -2.435 | -4.997 |
| H | 0.183  | -1.512 | -3.463 |
| H | 0.722  | -5.147 | -1.116 |
| C | 1.293  | -5.580 | -4.383 |
| C | 1.471  | -4.277 | -3.564 |
| H | 1.230  | -5.333 | -5.454 |
| H | 1.983  | -4.482 | -2.614 |
| H | 2.203  | -6.185 | -4.239 |
| H | 2.091  | -3.554 | -4.107 |
| H | -2.150 | -0.455 | 3.632  |

|   |        |        |        |
|---|--------|--------|--------|
| C | -1.929 | -1.129 | 2.788  |
| H | -1.518 | -2.746 | 4.279  |
| H | -0.919 | -0.867 | 2.417  |
| O | -1.464 | 1.936  | 0.449  |
| H | -2.789 | 0.049  | 1.178  |
| H | -3.960 | -1.023 | 2.024  |
| C | -1.886 | -2.555 | 3.266  |
| C | -2.931 | -0.941 | 1.631  |
| C | -2.522 | 2.862  | 0.427  |
| B | -1.024 | 1.254  | -0.807 |
| C | -2.241 | -3.610 | 2.487  |
| C | -2.686 | -2.009 | 0.549  |
| H | -2.181 | -4.639 | 2.850  |
| C | -3.310 | 0.889  | -1.840 |
| O | -2.076 | 0.361  | -1.412 |
| H | -1.689 | -1.781 | 0.114  |
| C | -2.640 | -3.421 | 1.085  |
| H | -3.424 | -1.952 | -0.264 |
| O | -2.860 | -4.414 | 0.351  |
| C | -0.548 | 2.390  | -1.919 |
| C | -0.924 | 1.110  | -4.058 |
| C | 0.364  | 4.109  | -0.316 |
| N | -0.426 | 2.241  | -3.279 |
| N | 0.136  | 3.549  | -1.651 |
| C | 0.665  | 4.102  | -2.811 |
| C | 0.312  | 3.277  | -3.838 |
| H | -0.129 | 0.766  | -4.735 |
| H | -1.805 | 1.410  | -4.647 |
| H | -1.192 | 0.324  | -3.350 |
| B | 0.484  | 0.304  | -0.524 |
| O | 0.219  | -0.989 | 0.243  |
| O | 1.112  | -0.204 | -1.803 |
| H | 0.519  | 3.323  | -4.901 |
| H | 1.246  | 5.016  | -2.791 |
| C | 1.916  | -1.294 | -1.391 |
| C | 1.132  | -1.963 | -0.220 |
| H | -0.536 | 4.628  | 0.042  |
| H | 1.196  | 4.822  | -0.388 |
| H | 0.618  | 3.286  | 0.355  |
| H | 1.825  | -2.299 | 0.581  |
| H | 0.576  | -2.859 | -0.566 |
| H | 2.088  | -1.987 | -2.236 |
| H | 2.905  | -0.947 | -1.025 |
| H | -4.045 | 0.962  | -1.014 |
| H | -3.740 | 0.223  | -2.615 |
| H | -3.203 | 1.902  | -2.283 |
| H | -2.380 | 3.605  | 1.238  |
| H | -3.511 | 2.382  | 0.587  |
| H | -2.579 | 3.417  | -0.534 |

|                                          | 1       | 2                           | 3       |
|------------------------------------------|---------|-----------------------------|---------|
|                                          | A       | A                           | A       |
| Frequencies --                           | 20.5065 | 34.8427                     | 39.7655 |
| Red. masses --                           | 4.4531  | 4.6439                      | 3.8072  |
| Zero-point correction=                   |         | 0.706972 (Hartree/Particle) |         |
| Thermal correction to Energy=            |         | 0.747521                    |         |
| Thermal correction to Enthalpy=          |         | 0.748465                    |         |
| Thermal correction to Gibbs Free Energy= |         | 0.635128                    |         |

Sum of electronic and zero-point Energies= -1698.686408  
 Sum of electronic and thermal Energies= -1698.645859  
 Sum of electronic and thermal Enthalpies= -1698.644915  
 Sum of electronic and thermal Free Energies= -1698.758252

| Item          | Value    | Threshold | Converged? |
|---------------|----------|-----------|------------|
| Maximum Force | 0.000223 | 0.000450  | YES        |
| RMS Force     | 0.000019 | 0.000300  | YES        |

-----

Besides the aforementioned pathways that were proposed for the NHC catalyzed boryl or silyl conjugate additions, multiple mechanisms were also explored using model systems on which DFT calculations were carried out. One of them includes a step where the chiral NHC inserts into the B–B or B–Si bond of the corresponding diboron and borosilane reagents. For example, the activation energy of the insertion process of the NHC (derived from **7c**) into PhMe<sub>2</sub>Si–B(OH)<sub>2</sub> is 22.2 kcal/mol. This transformation is also endergonic by 6.0 kcal/mol. However, we cannot find any low-energy transition state about the following reaction between those insertion products and enones. We also investigated a Lewis base activation of the insertion product, generating the corresponding B(pin) or SiMe<sub>2</sub>Ph bound N-heterocyclic carbanion. However, MeOH or water (being present) would rapidly protonate the formed carbanions, quenching the reaction. We also considered a similar pathway to the one previously reported by Fernández and co-workers.<sup>10</sup> However, no low-energy transition state can be found for the C–B or C–Si bond formation step.

#### ■ X-ray Structures for Compounds **15**, **34** and **43**:

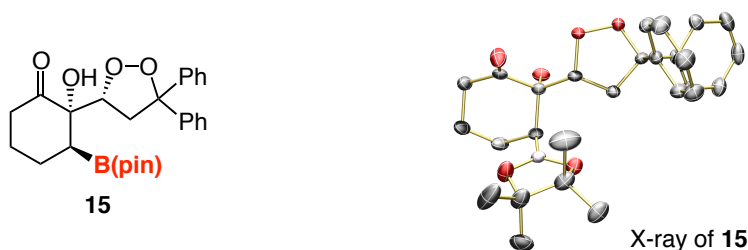

**Table 1.** Crystal data and structure refinement for compound **15**

|                      |                  |          |
|----------------------|------------------|----------|
| Identification code  | C27H33BO6        |          |
| Empirical formula    | C27 H33 B O6     |          |
| Formula weight       | 464.34           |          |
| Temperature          | 143(2) K         |          |
| Wavelength           | 0.71073 Å        |          |
| Crystal system       | Orthorhombic     |          |
| Space group          | P b c a          |          |
| Unit cell dimensions | a = 18.8781(9) Å | a = 90°. |
|                      | b = 12.1056(5) Å | b = 90°. |

|                                   |                                             |                      |
|-----------------------------------|---------------------------------------------|----------------------|
|                                   | $c = 21.2885(9) \text{ \AA}$                | $\beta = 90^\circ$ . |
| Volume                            | 4865.1(4) $\text{\AA}^3$                    |                      |
| Z                                 | 8                                           |                      |
| Density (calculated)              | 1.268 $\text{Mg/m}^3$                       |                      |
| Absorption coefficient            | 0.088 $\text{mm}^{-1}$                      |                      |
| F(000)                            | 1984                                        |                      |
| Crystal size                      | 0.17 x 0.02 x 0.02 $\text{mm}^3$            |                      |
| Theta range for data collection   | 1.91 to 26.00°.                             |                      |
| Index ranges                      | -23 ≤ h ≤ 23, -14 ≤ k ≤ 14, -26 ≤ l ≤ 26    |                      |
| Reflections collected             | 64871                                       |                      |
| Independent reflections           | 4780 [R(int) = 0.0899]                      |                      |
| Completeness to theta = 26.00°    | 100.0 %                                     |                      |
| Absorption correction             | Semi-empirical from equivalents             |                      |
| Max. and min. transmission        | 0.9983 and 0.9853                           |                      |
| Refinement method                 | Full-matrix least-squares on F <sup>2</sup> |                      |
| Data / restraints / parameters    | 4780 / 0 / 310                              |                      |
| Goodness-of-fit on F <sup>2</sup> | 1.009                                       |                      |
| Final R indices [I > 2σ(I)]       | R1 = 0.0450, wR2 = 0.0943                   |                      |
| R indices (all data)              | R1 = 0.0840, wR2 = 0.1110                   |                      |
| Extinction coefficient            | na                                          |                      |
| Largest diff. peak and hole       | 0.408 and -0.214 e. $\text{\AA}^{-3}$       |                      |

**Table 2.** Atomic coordinates ( $\times 10^4$ ) and equivalent isotropic displacement parameters ( $\text{\AA}^2 \times 10^3$ ) for compound **15**. U(eq) is defined as one third of the trace of the orthogonalized  $U^{ij}$  tensor

|      | x       | y        | z       | U(eq) |
|------|---------|----------|---------|-------|
| B(1) | 1503(1) | 522(2)   | 2566(1) | 23(1) |
| O(1) | 1491(1) | -2315(1) | 2112(1) | 39(1) |
| O(2) | 920(1)  | 296(1)   | 2912(1) | 45(1) |
| O(3) | 1377(1) | 1282(1)  | 2103(1) | 31(1) |

|       |         |          |         |       |
|-------|---------|----------|---------|-------|
| O(4)  | 3147(1) | -1286(1) | 2353(1) | 29(1) |
| O(5)  | 3074(1) | -1134(1) | 708(1)  | 27(1) |
| O(6)  | 2561(1) | -1597(1) | 1175(1) | 28(1) |
| C(1)  | 1953(1) | -1955(2) | 2449(1) | 25(1) |
| C(2)  | 2078(1) | -2348(2) | 3109(1) | 32(1) |
| C(3)  | 1940(1) | -1379(2) | 3560(1) | 36(1) |
| C(4)  | 2374(1) | -368(2)  | 3379(1) | 33(1) |
| C(5)  | 2256(1) | -8(2)    | 2690(1) | 24(1) |
| C(6)  | 2424(1) | -988(1)  | 2247(1) | 21(1) |
| C(7)  | 365(1)  | 1074(2)  | 2719(1) | 43(1) |
| C(8)  | 599(1)  | 1370(2)  | 2052(1) | 36(1) |
| C(9)  | -346(1) | 505(2)   | 2775(2) | 65(1) |
| C(10) | 409(1)  | 2068(2)  | 3166(1) | 53(1) |
| C(11) | 372(1)  | 502(2)   | 1562(1) | 61(1) |
| C(12) | 410(1)  | 2515(2)  | 1826(1) | 42(1) |
| C(13) | 2316(1) | -680(1)  | 1559(1) | 22(1) |
| C(14) | 2745(1) | 312(1)   | 1343(1) | 24(1) |
| C(15) | 2888(1) | 21(2)    | 659(1)  | 23(1) |
| C(16) | 2231(1) | 197(2)   | 251(1)  | 24(1) |
| C(17) | 1970(1) | 1269(2)  | 182(1)  | 30(1) |
| C(18) | 1373(1) | 1473(2)  | -176(1) | 37(1) |
| C(19) | 1026(1) | 609(2)   | -470(1) | 39(1) |
| C(20) | 1281(1) | -451(2)  | -405(1) | 38(1) |
| C(21) | 1882(1) | -657(2)  | -48(1)  | 30(1) |
| C(22) | 3531(1) | 577(2)   | 369(1)  | 25(1) |
| C(23) | 3791(1) | 1568(2)  | 608(1)  | 32(1) |
| C(24) | 4360(1) | 2090(2)  | 320(1)  | 38(1) |
| C(25) | 4675(1) | 1627(2)  | -200(1) | 39(1) |
| C(26) | 4420(1) | 643(2)   | -440(1) | 39(1) |
| C(27) | 3850(1) | 125(2)   | -162(1) | 31(1) |

---

**Table 3.** Bond lengths [Å] and angles [°] for compound **15**

---

|              |            |
|--------------|------------|
| B(1)-O(2)    | 1.352(3)   |
| B(1)-O(3)    | 1.369(3)   |
| B(1)-C(5)    | 1.582(3)   |
| O(1)-C(1)    | 1.211(2)   |
| O(2)-C(7)    | 1.468(2)   |
| O(3)-C(8)    | 1.475(2)   |
| O(4)-C(6)    | 1.429(2)   |
| O(4)-H(4O)   | 0.85(2)    |
| O(5)-C(15)   | 1.445(2)   |
| O(5)-O(6)    | 1.4959(17) |
| O(6)-C(13)   | 1.454(2)   |
| C(1)-C(2)    | 1.502(3)   |
| C(1)-C(6)    | 1.532(3)   |
| C(2)-C(3)    | 1.539(3)   |
| C(2)-H(2A)   | 0.9900     |
| C(2)-H(2B)   | 0.9900     |
| C(3)-C(4)    | 1.523(3)   |
| C(3)-H(3A)   | 0.9900     |
| C(3)-H(3B)   | 0.9900     |
| C(4)-C(5)    | 1.546(3)   |
| C(4)-H(4A)   | 0.9900     |
| C(4)-H(4B)   | 0.9900     |
| C(5)-C(6)    | 1.548(2)   |
| C(5)-H(5)    | 1.0000     |
| C(6)-C(13)   | 1.527(3)   |
| C(7)-C(9)    | 1.513(3)   |
| C(7)-C(8)    | 1.530(3)   |
| C(7)-C(10)   | 1.536(3)   |
| C(8)-C(12)   | 1.510(3)   |
| C(8)-C(11)   | 1.540(3)   |
| C(9)-H(9A)   | 0.9800     |
| C(9)-H(9B)   | 0.9800     |
| C(9)-H(9C)   | 0.9800     |
| C(10)-H(10A) | 0.9800     |

|              |          |
|--------------|----------|
| C(10)-H(10B) | 0.9800   |
| C(10)-H(10C) | 0.9800   |
| C(11)-H(11A) | 0.9800   |
| C(11)-H(11B) | 0.9800   |
| C(11)-H(11C) | 0.9800   |
| C(12)-H(12A) | 0.9800   |
| C(12)-H(12B) | 0.9800   |
| C(12)-H(12C) | 0.9800   |
| C(13)-C(14)  | 1.519(2) |
| C(13)-H(13)  | 1.0000   |
| C(14)-C(15)  | 1.522(3) |
| C(14)-H(14A) | 0.9900   |
| C(14)-H(14B) | 0.9900   |
| C(15)-C(22)  | 1.520(3) |
| C(15)-C(16)  | 1.530(3) |
| C(16)-C(21)  | 1.380(3) |
| C(16)-C(17)  | 1.396(3) |
| C(17)-C(18)  | 1.383(3) |
| C(17)-H(17)  | 0.9500   |
| C(18)-C(19)  | 1.383(3) |
| C(18)-H(18)  | 0.9500   |
| C(19)-C(20)  | 1.377(3) |
| C(19)-H(19)  | 0.9500   |
| C(20)-C(21)  | 1.388(3) |
| C(20)-H(20)  | 0.9500   |
| C(21)-H(21)  | 0.9500   |
| C(22)-C(23)  | 1.391(3) |
| C(22)-C(27)  | 1.392(3) |
| C(23)-C(24)  | 1.388(3) |
| C(23)-H(23)  | 0.9500   |
| C(24)-C(25)  | 1.375(3) |
| C(24)-H(24)  | 0.9500   |
| C(25)-C(26)  | 1.383(3) |
| C(25)-H(25)  | 0.9500   |



|                  |            |
|------------------|------------|
| C(26)-C(27)      | 1.380(3)   |
| C(26)-H(26)      | 0.9500     |
| C(27)-H(27)      | 0.9500     |
| O(2)-B(1)-O(3)   | 112.73(17) |
| O(2)-B(1)-C(5)   | 123.92(18) |
| O(3)-B(1)-C(5)   | 123.33(17) |
| B(1)-O(2)-C(7)   | 107.35(16) |
| B(1)-O(3)-C(8)   | 105.99(15) |
| C(6)-O(4)-H(4O)  | 106.5(15)  |
| C(15)-O(5)-O(6)  | 104.73(12) |
| C(13)-O(6)-O(5)  | 107.00(11) |
| O(1)-C(1)-C(2)   | 123.62(18) |
| O(1)-C(1)-C(6)   | 121.84(17) |
| C(2)-C(1)-C(6)   | 114.39(16) |
| C(1)-C(2)-C(3)   | 108.37(16) |
| C(1)-C(2)-H(2A)  | 110.0      |
| C(3)-C(2)-H(2A)  | 110.0      |
| C(1)-C(2)-H(2B)  | 110.0      |
| C(3)-C(2)-H(2B)  | 110.0      |
| H(2A)-C(2)-H(2B) | 108.4      |
| C(4)-C(3)-C(2)   | 111.34(17) |
| C(4)-C(3)-H(3A)  | 109.4      |
| C(2)-C(3)-H(3A)  | 109.4      |
| C(4)-C(3)-H(3B)  | 109.4      |
| C(2)-C(3)-H(3B)  | 109.4      |
| H(3A)-C(3)-H(3B) | 108.0      |
| C(3)-C(4)-C(5)   | 112.84(17) |
| C(3)-C(4)-H(4A)  | 109.0      |
| C(5)-C(4)-H(4A)  | 109.0      |
| C(3)-C(4)-H(4B)  | 109.0      |
| C(5)-C(4)-H(4B)  | 109.0      |
| H(4A)-C(4)-H(4B) | 107.8      |
| C(4)-C(5)-C(6)   | 109.46(15) |

|                     |            |
|---------------------|------------|
| C(4)-C(5)-B(1)      | 113.70(16) |
| C(6)-C(5)-B(1)      | 113.19(15) |
| C(4)-C(5)-H(5)      | 106.7      |
| C(6)-C(5)-H(5)      | 106.7      |
| B(1)-C(5)-H(5)      | 106.7      |
| O(4)-C(6)-C(13)     | 109.90(15) |
| O(4)-C(6)-C(1)      | 108.52(14) |
| C(13)-C(6)-C(1)     | 112.19(15) |
| O(4)-C(6)-C(5)      | 107.07(14) |
| C(13)-C(6)-C(5)     | 111.78(14) |
| C(1)-C(6)-C(5)      | 107.17(14) |
| O(2)-C(7)-C(9)      | 108.58(17) |
| O(2)-C(7)-C(8)      | 101.78(16) |
| C(9)-C(7)-C(8)      | 115.8(2)   |
| O(2)-C(7)-C(10)     | 106.8(2)   |
| C(9)-C(7)-C(10)     | 110.9(2)   |
| C(8)-C(7)-C(10)     | 112.13(19) |
| O(3)-C(8)-C(12)     | 108.95(16) |
| O(3)-C(8)-C(7)      | 101.63(16) |
| C(12)-C(8)-C(7)     | 116.19(19) |
| O(3)-C(8)-C(11)     | 106.17(17) |
| C(12)-C(8)-C(11)    | 110.2(2)   |
| C(7)-C(8)-C(11)     | 112.9(2)   |
| C(7)-C(9)-H(9A)     | 109.5      |
| C(7)-C(9)-H(9B)     | 109.5      |
| H(9A)-C(9)-H(9B)    | 109.5      |
| C(7)-C(9)-H(9C)     | 109.5      |
| H(9A)-C(9)-H(9C)    | 109.5      |
| H(9B)-C(9)-H(9C)    | 109.5      |
| C(7)-C(10)-H(10A)   | 109.5      |
| C(7)-C(10)-H(10B)   | 109.5      |
| H(10A)-C(10)-H(10B) | 109.5      |
| C(7)-C(10)-H(10C)   | 109.5      |
| H(10A)-C(10)-H(10C) | 109.5      |

|                     |            |
|---------------------|------------|
| H(10B)-C(10)-H(10C) | 109.5      |
| C(8)-C(11)-H(11A)   | 109.5      |
| C(8)-C(11)-H(11B)   | 109.5      |
| H(11A)-C(11)-H(11B) | 109.5      |
| C(8)-C(11)-H(11C)   | 109.5      |
| H(11A)-C(11)-H(11C) | 109.5      |
| H(11B)-C(11)-H(11C) | 109.5      |
| C(8)-C(12)-H(12A)   | 109.5      |
| C(8)-C(12)-H(12B)   | 109.5      |
| H(12A)-C(12)-H(12B) | 109.5      |
| C(8)-C(12)-H(12C)   | 109.5      |
| H(12A)-C(12)-H(12C) | 109.5      |
| H(12B)-C(12)-H(12C) | 109.5      |
| O(6)-C(13)-C(14)    | 105.29(14) |
| O(6)-C(13)-C(6)     | 108.09(14) |
| C(14)-C(13)-C(6)    | 114.33(15) |
| O(6)-C(13)-H(13)    | 109.7      |
| C(14)-C(13)-H(13)   | 109.7      |
| C(6)-C(13)-H(13)    | 109.7      |
| C(13)-C(14)-C(15)   | 101.61(14) |
| C(13)-C(14)-H(14A)  | 111.4      |
| C(15)-C(14)-H(14A)  | 111.4      |
| C(13)-C(14)-H(14B)  | 111.4      |
| C(15)-C(14)-H(14B)  | 111.4      |
| H(14A)-C(14)-H(14B) | 109.3      |
| O(5)-C(15)-C(22)    | 105.32(14) |
| O(5)-C(15)-C(14)    | 101.35(14) |
| C(22)-C(15)-C(14)   | 115.28(16) |
| O(5)-C(15)-C(16)    | 111.91(15) |
| C(22)-C(15)-C(16)   | 110.88(15) |
| C(14)-C(15)-C(16)   | 111.57(15) |
| C(21)-C(16)-C(17)   | 118.66(18) |
| C(21)-C(16)-C(15)   | 122.96(17) |
| C(17)-C(16)-C(15)   | 118.37(16) |

|                   |            |
|-------------------|------------|
| C(18)-C(17)-C(16) | 120.72(18) |
| C(18)-C(17)-H(17) | 119.6      |
| C(16)-C(17)-H(17) | 119.6      |
| C(19)-C(18)-C(17) | 120.04(19) |
| C(19)-C(18)-H(18) | 120.0      |
| C(17)-C(18)-H(18) | 120.0      |
| C(20)-C(19)-C(18) | 119.6(2)   |
| C(20)-C(19)-H(19) | 120.2      |
| C(18)-C(19)-H(19) | 120.2      |
| C(19)-C(20)-C(21) | 120.53(19) |
| C(19)-C(20)-H(20) | 119.7      |
| C(21)-C(20)-H(20) | 119.7      |
| C(16)-C(21)-C(20) | 120.48(18) |
| C(16)-C(21)-H(21) | 119.8      |
| C(20)-C(21)-H(21) | 119.8      |
| C(23)-C(22)-C(27) | 118.86(18) |
| C(23)-C(22)-C(15) | 121.05(17) |
| C(27)-C(22)-C(15) | 120.01(17) |
| C(24)-C(23)-C(22) | 120.3(2)   |
| C(24)-C(23)-H(23) | 119.9      |
| C(22)-C(23)-H(23) | 119.9      |
| C(25)-C(24)-C(23) | 120.2(2)   |
| C(25)-C(24)-H(24) | 119.9      |
| C(23)-C(24)-H(24) | 119.9      |
| C(24)-C(25)-C(26) | 119.9(2)   |
| C(24)-C(25)-H(25) | 120.0      |
| C(26)-C(25)-H(25) | 120.0      |
| C(27)-C(26)-C(25) | 120.2(2)   |
| C(27)-C(26)-H(26) | 119.9      |
| C(25)-C(26)-H(26) | 119.9      |
| C(26)-C(27)-C(22) | 120.5(2)   |
| C(26)-C(27)-H(27) | 119.8      |
| C(22)-C(27)-H(27) | 119.8      |

---

Symmetry transformations used to generate equivalent atoms:

**Table 4.** Anisotropic displacement parameters ( $\text{\AA}^2 \times 10^3$ ) for compound **15**. The anisotropic displacement factor exponent takes the form:  $-2p^2 [ h^2 a^* U^{11} + \dots + 2 h k a^* b^* U^{12} ]$

|       | U11   | U22   | U33    | U23    | U13    | U12    |
|-------|-------|-------|--------|--------|--------|--------|
| B(1)  | 26(1) | 17(1) | 26(1)  | -4(1)  | 1(1)   | 2(1)   |
| O(1)  | 44(1) | 41(1) | 32(1)  | 0(1)   | -2(1)  | -18(1) |
| O(2)  | 32(1) | 39(1) | 64(1)  | 22(1)  | 15(1)  | 15(1)  |
| O(3)  | 23(1) | 32(1) | 37(1)  | 6(1)   | -3(1)  | 3(1)   |
| O(4)  | 22(1) | 30(1) | 34(1)  | -7(1)  | -2(1)  | 7(1)   |
| O(5)  | 33(1) | 22(1) | 26(1)  | 1(1)   | 7(1)   | 4(1)   |
| O(6)  | 40(1) | 20(1) | 25(1)  | -4(1)  | 9(1)   | -2(1)  |
| C(1)  | 28(1) | 22(1) | 26(1)  | -6(1)  | 5(1)   | 7(1)   |
| C(2)  | 42(1) | 26(1) | 28(1)  | 1(1)   | 3(1)   | 6(1)   |
| C(3)  | 53(1) | 33(1) | 22(1)  | 1(1)   | 2(1)   | 13(1)  |
| C(4)  | 44(1) | 30(1) | 25(1)  | -7(1)  | -6(1)  | 8(1)   |
| C(5)  | 26(1) | 21(1) | 24(1)  | -5(1)  | -2(1)  | 1(1)   |
| C(6)  | 19(1) | 20(1) | 24(1)  | -3(1)  | 0(1)   | 3(1)   |
| C(7)  | 29(1) | 33(1) | 66(2)  | 12(1)  | 8(1)   | 10(1)  |
| C(8)  | 24(1) | 31(1) | 54(2)  | 2(1)   | -8(1)  | 2(1)   |
| C(9)  | 29(1) | 36(1) | 129(3) | 24(2)  | 16(2)  | 5(1)   |
| C(10) | 48(2) | 53(2) | 56(2)  | -8(1)  | 11(1)  | 22(1)  |
| C(11) | 50(2) | 55(2) | 77(2)  | -24(2) | -30(1) | 10(1)  |
| C(12) | 32(1) | 35(1) | 60(2)  | 9(1)   | -14(1) | 5(1)   |
| C(13) | 25(1) | 18(1) | 24(1)  | -5(1)  | 1(1)   | 2(1)   |
| C(14) | 26(1) | 21(1) | 24(1)  | -4(1)  | 1(1)   | 0(1)   |
| C(15) | 28(1) | 17(1) | 25(1)  | -2(1)  | 1(1)   | 3(1)   |
| C(16) | 25(1) | 24(1) | 23(1)  | -1(1)  | 3(1)   | -2(1)  |
| C(17) | 31(1) | 25(1) | 35(1)  | -4(1)  | -2(1)  | -1(1)  |
| C(18) | 35(1) | 30(1) | 46(1)  | -1(1)  | -6(1)  | 6(1)   |

|       |       |       |       |       |        |       |
|-------|-------|-------|-------|-------|--------|-------|
| C(19) | 33(1) | 41(1) | 42(1) | 2(1)  | -10(1) | 1(1)  |
| C(20) | 43(1) | 32(1) | 38(1) | -2(1) | -12(1) | -8(1) |
| C(21) | 39(1) | 22(1) | 30(1) | 0(1)  | -3(1)  | -1(1) |
| C(22) | 24(1) | 27(1) | 23(1) | 5(1)  | -3(1)  | 3(1)  |
| C(23) | 33(1) | 32(1) | 32(1) | 1(1)  | 4(1)   | -1(1) |
| C(24) | 36(1) | 38(1) | 39(1) | 8(1)  | -4(1)  | -8(1) |
| C(25) | 25(1) | 58(2) | 36(1) | 19(1) | -1(1)  | -6(1) |
| C(26) | 32(1) | 60(2) | 25(1) | 7(1)  | 4(1)   | 6(1)  |
| C(27) | 32(1) | 37(1) | 26(1) | 2(1)  | -1(1)  | 4(1)  |

**Table 5.** Hydrogen coordinates (  $\times 10^4$ ) and isotropic displacement parameters ( $\text{\AA}^2 \times 10^3$ ) for compound **15**

|        | x        | y         | z        | U(eq) |
|--------|----------|-----------|----------|-------|
| H(4O)  | 3243(12) | -1800(20) | 2093(11) | 43    |
| H(2A)  | 2572     | -2610     | 3155     | 38    |
| H(2B)  | 1755     | -2969     | 3208     | 38    |
| H(3A)  | 1430     | -1188     | 3552     | 43    |
| H(3B)  | 2062     | -1604     | 3994     | 43    |
| H(4A)  | 2883     | -533      | 3443     | 40    |
| H(4B)  | 2247     | 253       | 3661     | 40    |
| H(5)   | 2614     | 578       | 2599     | 28    |
| H(9A)  | -363     | -123      | 2485     | 98    |
| H(9B)  | -724     | 1028      | 2670     | 98    |
| H(9C)  | -410     | 240       | 3206     | 98    |
| H(10A) | 255      | 1843      | 3587     | 79    |
| H(10B) | 102      | 2661      | 3012     | 79    |
| H(10C) | 899      | 2333      | 3185     | 79    |
| H(11A) | 495      | -237      | 1714     | 91    |
| H(11B) | 617      | 644       | 1165     | 91    |

|        |      |       |      |    |
|--------|------|-------|------|----|
| H(11C) | -141 | 549   | 1496 | 91 |
| H(12A) | 553  | 3058  | 2143 | 63 |
| H(12B) | -102 | 2562  | 1759 | 63 |
| H(12C) | 658  | 2667  | 1431 | 63 |
| H(13)  | 1802 | -545  | 1477 | 27 |
| H(14A) | 3191 | 383   | 1584 | 29 |
| H(14B) | 2470 | 1005  | 1380 | 29 |
| H(17)  | 2204 | 1865  | 384  | 36 |
| H(18)  | 1202 | 2206  | -221 | 44 |
| H(19)  | 614  | 746   | -714 | 46 |
| H(20)  | 1044 | -1045 | -606 | 45 |
| H(21)  | 2055 | -1391 | -9   | 36 |
| H(23)  | 3578 | 1888  | 969  | 39 |
| H(24)  | 4532 | 2769  | 483  | 45 |
| H(25)  | 5067 | 1982  | -393 | 47 |
| H(26)  | 4638 | 323   | -799 | 47 |
| H(27)  | 3673 | -545  | -333 | 38 |

---

**Table 6.** Torsion angles [°] for compound **15**

|                       |            |
|-----------------------|------------|
| O(3)-B(1)-O(2)-C(7)   | -7.6(2)    |
| C(5)-B(1)-O(2)-C(7)   | 171.04(19) |
| O(2)-B(1)-O(3)-C(8)   | -13.9(2)   |
| C(5)-B(1)-O(3)-C(8)   | 167.44(17) |
| C(15)-O(5)-O(6)-C(13) | -23.31(16) |
| O(1)-C(1)-C(2)-C(3)   | -116.1(2)  |
| C(6)-C(1)-C(2)-C(3)   | 59.4(2)    |
| C(1)-C(2)-C(3)-C(4)   | -53.9(2)   |
| C(2)-C(3)-C(4)-C(5)   | 54.8(2)    |
| C(3)-C(4)-C(5)-C(6)   | -56.5(2)   |
| C(3)-C(4)-C(5)-B(1)   | 71.2(2)    |
| O(2)-B(1)-C(5)-C(4)   | -26.4(3)   |
| O(3)-B(1)-C(5)-C(4)   | 152.16(18) |

|                       |             |
|-----------------------|-------------|
| O(2)-B(1)-C(5)-C(6)   | 99.4(2)     |
| O(3)-B(1)-C(5)-C(6)   | -82.1(2)    |
| O(1)-C(1)-C(6)-O(4)   | -130.42(18) |
| C(2)-C(1)-C(6)-O(4)   | 53.93(19)   |
| O(1)-C(1)-C(6)-C(13)  | -8.8(2)     |
| C(2)-C(1)-C(6)-C(13)  | 175.56(15)  |
| O(1)-C(1)-C(6)-C(5)   | 114.27(19)  |
| C(2)-C(1)-C(6)-C(5)   | -61.38(19)  |
| C(4)-C(5)-C(6)-O(4)   | -59.63(19)  |
| B(1)-C(5)-C(6)-O(4)   | 172.41(15)  |
| C(4)-C(5)-C(6)-C(13)  | 179.96(15)  |
| B(1)-C(5)-C(6)-C(13)  | 52.0(2)     |
| C(4)-C(5)-C(6)-C(1)   | 56.65(19)   |
| B(1)-C(5)-C(6)-C(1)   | -71.32(19)  |
| B(1)-O(2)-C(7)-C(9)   | 147.3(2)    |
| B(1)-O(2)-C(7)-C(8)   | 24.7(2)     |
| B(1)-O(2)-C(7)-C(10)  | -93.1(2)    |
| B(1)-O(3)-C(8)-C(12)  | 151.26(19)  |
| B(1)-O(3)-C(8)-C(7)   | 28.09(19)   |
| B(1)-O(3)-C(8)-C(11)  | -90.1(2)    |
| O(2)-C(7)-C(8)-O(3)   | -31.4(2)    |
| C(9)-C(7)-C(8)-O(3)   | -148.96(17) |
| C(10)-C(7)-C(8)-O(3)  | 82.4(2)     |
| O(2)-C(7)-C(8)-C(12)  | -149.49(18) |
| C(9)-C(7)-C(8)-C(12)  | 93.0(2)     |
| C(10)-C(7)-C(8)-C(12) | -35.7(3)    |
| O(2)-C(7)-C(8)-C(11)  | 81.9(2)     |
| C(9)-C(7)-C(8)-C(11)  | -35.7(3)    |
| C(10)-C(7)-C(8)-C(11) | -164.29(19) |
| O(5)-O(6)-C(13)-C(14) | -4.81(17)   |
| O(5)-O(6)-C(13)-C(6)  | -127.39(14) |
| O(4)-C(6)-C(13)-O(6)  | 54.87(18)   |
| C(1)-C(6)-C(13)-O(6)  | -65.96(18)  |
| C(5)-C(6)-C(13)-O(6)  | 173.62(14)  |



|                         |             |
|-------------------------|-------------|
| O(4)-C(6)-C(13)-C(14)   | -62.01(19)  |
| C(1)-C(6)-C(13)-C(14)   | 177.16(15)  |
| C(5)-C(6)-C(13)-C(14)   | 56.7(2)     |
| O(6)-C(13)-C(14)-C(15)  | 29.40(18)   |
| C(6)-C(13)-C(14)-C(15)  | 147.88(15)  |
| O(6)-O(5)-C(15)-C(22)   | 161.67(13)  |
| O(6)-O(5)-C(15)-C(14)   | 41.23(16)   |
| O(6)-O(5)-C(15)-C(16)   | -77.77(16)  |
| C(13)-C(14)-C(15)-O(5)  | -43.53(17)  |
| C(13)-C(14)-C(15)-C(22) | -156.66(15) |
| C(13)-C(14)-C(15)-C(16) | 75.72(18)   |
| O(5)-C(15)-C(16)-C(21)  | -2.2(3)     |
| C(22)-C(15)-C(16)-C(21) | 115.1(2)    |
| C(14)-C(15)-C(16)-C(21) | -115.0(2)   |
| O(5)-C(15)-C(16)-C(17)  | 177.28(16)  |
| C(22)-C(15)-C(16)-C(17) | -65.4(2)    |
| C(14)-C(15)-C(16)-C(17) | 64.5(2)     |
| C(21)-C(16)-C(17)-C(18) | 0.1(3)      |
| C(15)-C(16)-C(17)-C(18) | -179.38(18) |
| C(16)-C(17)-C(18)-C(19) | 0.3(3)      |
| C(17)-C(18)-C(19)-C(20) | -0.4(3)     |
| C(18)-C(19)-C(20)-C(21) | 0.1(4)      |
| C(17)-C(16)-C(21)-C(20) | -0.5(3)     |
| C(15)-C(16)-C(21)-C(20) | 179.01(19)  |
| C(19)-C(20)-C(21)-C(16) | 0.4(3)      |
| O(5)-C(15)-C(22)-C(23)  | -135.11(18) |
| C(14)-C(15)-C(22)-C(23) | -24.3(3)    |
| C(16)-C(15)-C(22)-C(23) | 103.7(2)    |
| O(5)-C(15)-C(22)-C(27)  | 48.1(2)     |
| C(14)-C(15)-C(22)-C(27) | 158.87(17)  |
| C(16)-C(15)-C(22)-C(27) | -73.2(2)    |
| C(27)-C(22)-C(23)-C(24) | -0.2(3)     |
| C(15)-C(22)-C(23)-C(24) | -177.10(18) |
| C(22)-C(23)-C(24)-C(25) | -0.6(3)     |

|                         |            |
|-------------------------|------------|
| C(23)-C(24)-C(25)-C(26) | 0.7(3)     |
| C(24)-C(25)-C(26)-C(27) | 0.1(3)     |
| C(25)-C(26)-C(27)-C(22) | -0.9(3)    |
| C(23)-C(22)-C(27)-C(26) | 0.9(3)     |
| C(15)-C(22)-C(27)-C(26) | 177.84(18) |

Symmetry transformations used to generate equivalent atoms:

**Table 7.** Hydrogen bonds for compound **15** [Å and °]

| D-H...A             | d(D-H)  | d(H...A) | d(D...A)   | <(DHA) |
|---------------------|---------|----------|------------|--------|
| O(4)-H(4O)...O(3)#1 | 0.85(2) | 2.43(2)  | 3.1246(19) | 139(2) |

Symmetry transformations used to generate equivalent atoms:

#1 -x+1/2,y-1/2,z

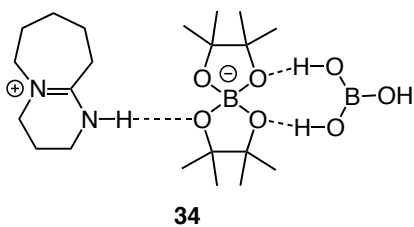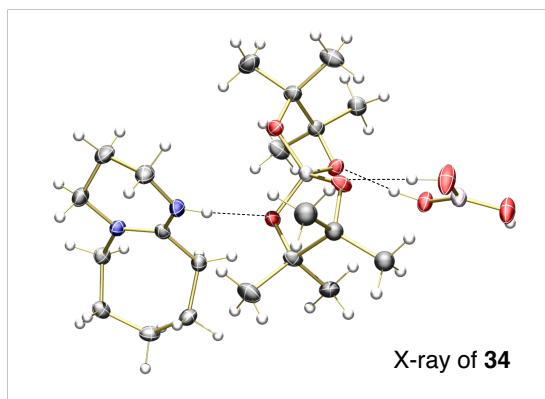

**Table 1.** Crystal data and structure refinement for compound **34**

|                      |                  |         |
|----------------------|------------------|---------|
| Identification code  | C21H44B2N2O7     |         |
| Empirical formula    | C21 H44 B2 N2 O7 |         |
| Formula weight       | 458.20           |         |
| Temperature          | 100(2) K         |         |
| Wavelength           | 1.54178 Å        |         |
| Crystal system       | Monoclinic       |         |
| Space group          | P c              |         |
| Unit cell dimensions | a = 8.1777(3) Å  | a = 90° |

|                                       |                                                            |                        |
|---------------------------------------|------------------------------------------------------------|------------------------|
|                                       | $b = 17.5288(6) \text{ \AA}$                               | $b = 101.375(2)^\circ$ |
|                                       | $c = 18.6171(6) \text{ \AA}$                               | $g = 90^\circ$         |
| Volume                                | $2616.25(16) \text{ \AA}^3$                                |                        |
| Z                                     | 4                                                          |                        |
| Density (calculated)                  | $1.163 \text{ Mg/m}^3$                                     |                        |
| Absorption coefficient                | $0.684 \text{ mm}^{-1}$                                    |                        |
| F(000)                                | 1000                                                       |                        |
| Crystal size                          | $0.15 \times 0.10 \times 0.06 \text{ mm}^3$                |                        |
| Theta range for data collection       | 5.52 to $67.81^\circ$                                      |                        |
| Index ranges                          | $-9 \leq h \leq 8, -20 \leq k \leq 20, -21 \leq l \leq 22$ |                        |
| Reflections collected                 | 17780                                                      |                        |
| Independent reflections               | 6250 [R(int) = 0.0324]                                     |                        |
| Completeness to theta = $66.50^\circ$ | 98.5 %                                                     |                        |
| Absorption correction                 | Semi-empirical from equivalents                            |                        |
| Max. and min. transmission            | 0.9601 and 0.9044                                          |                        |
| Refinement method                     | Full-matrix least-squares on $F^2$                         |                        |
| Data / restraints / parameters        | 6250 / 2 / 615                                             |                        |
| Goodness-of-fit on $F^2$              | 1.013                                                      |                        |
| Final R indices [I > $2\sigma(I)$ ]   | R1 = 0.0309, wR2 = 0.0815                                  |                        |
| R indices (all data)                  | R1 = 0.0315, wR2 = 0.0823                                  |                        |
| Extinction coefficient                | na                                                         |                        |
| Largest diff. peak and hole           | 0.199 and $-0.170 \text{ e. \AA}^{-3}$                     |                        |

**Table 2.** Atomic coordinates ( $\times 10^4$ ) and equivalent isotropic displacement parameters ( $\text{\AA}^2 \times 10^3$ ) for compound **34**.  $U(\text{eq})$  is defined as one third of the trace of the orthogonalized  $U_{ij}$  tensor

|      | x       | y        | z       | $U(\text{eq})$ |
|------|---------|----------|---------|----------------|
| B(1) | 949(2)  | 9786(1)  | 2556(1) | 18(1)          |
| O(1) | -236(2) | 10323(1) | 2772(1) | 20(1)          |
| O(2) | 2585(2) | 10090(1) | 2895(1) | 19(1)          |

|       |          |          |         |       |
|-------|----------|----------|---------|-------|
| O(3)  | 548(2)   | 9012(1)  | 2784(1) | 19(1) |
| O(4)  | 858(2)   | 9707(1)  | 1756(1) | 20(1) |
| C(1)  | 601(2)   | 11009(1) | 3038(1) | 20(1) |
| C(2)  | 2400(2)  | 10713(1) | 3367(1) | 20(1) |
| C(3)  | 617(2)   | 8485(1)  | 2202(1) | 21(1) |
| C(4)  | 94(2)    | 8992(1)  | 1510(1) | 21(1) |
| C(5)  | 562(3)   | 11553(1) | 2397(1) | 26(1) |
| C(6)  | -311(3)  | 11372(1) | 3594(1) | 28(1) |
| C(7)  | 3780(3)  | 11289(1) | 3343(1) | 29(1) |
| C(8)  | 2538(3)  | 10408(1) | 4146(1) | 28(1) |
| C(9)  | 2405(3)  | 8193(1)  | 2283(1) | 28(1) |
| C(10) | -557(3)  | 7823(1)  | 2254(1) | 32(1) |
| C(11) | 755(3)   | 8726(1)  | 843(1)  | 26(1) |
| C(12) | -1790(2) | 9115(1)  | 1301(1) | 26(1) |
| C(13) | 4602(2)  | 9684(1)  | 6225(1) | 26(1) |
| C(14) | 5601(2)  | 8980(1)  | 6117(1) | 26(1) |
| C(15) | 5066(2)  | 8690(1)  | 5338(1) | 27(1) |
| N(1)  | 3242(2)  | 8652(1)  | 5117(1) | 22(1) |
| C(17) | 2585(2)  | 8206(1)  | 4447(1) | 27(1) |
| C(18) | 1793(3)  | 7452(1)  | 4605(1) | 29(1) |
| C(19) | 47(3)    | 7534(1)  | 4768(1) | 30(1) |
| C(20) | -105(2)  | 8066(1)  | 5400(1) | 24(1) |
| C(21) | 397(2)   | 8898(1)  | 5295(1) | 22(1) |
| C(22) | 2248(2)  | 9026(1)  | 5476(1) | 18(1) |
| N(2)  | 2828(2)  | 9502(1)  | 6009(1) | 20(1) |
| B(2)  | 6646(3)  | 9348(1)  | 3329(1) | 20(1) |
| O(5)  | 6673(2)  | 9961(1)  | 2880(1) | 25(1) |
| O(6)  | 8017(2)  | 8899(1)  | 3576(1) | 27(1) |
| O(7)  | 5215(2)  | 9162(1)  | 3555(1) | 27(1) |
| B(3)  | 5635(2)  | 4644(1)  | 2708(1) | 19(1) |
| O(8)  | 7050(2)  | 4204(1)  | 2561(1) | 22(1) |
| O(9)  | 4166(2)  | 4243(1)  | 2303(1) | 22(1) |
| O(10) | 5790(2)  | 5445(1)  | 2476(1) | 23(1) |
| O(11) | 5476(2)  | 4715(1)  | 3479(1) | 24(1) |

|        |          |         |         |       |
|--------|----------|---------|---------|-------|
| C(24)  | 6456(2)  | 3502(1) | 2202(1) | 24(1) |
| C(25)  | 4657(2)  | 3709(1) | 1809(1) | 22(1) |
| C(26)  | 5372(3)  | 5951(1) | 3014(1) | 24(1) |
| C(28)  | 6468(3)  | 2886(1) | 2789(1) | 33(1) |
| C(29)  | 7626(3)  | 3273(1) | 1697(1) | 39(1) |
| C(30)  | 3430(3)  | 3045(1) | 1704(1) | 28(1) |
| C(31)  | 4608(3)  | 4105(1) | 1078(1) | 32(1) |
| C(32)  | 3505(3)  | 6096(1) | 2831(1) | 34(1) |
| C(33)  | 6295(3)  | 6702(1) | 2994(1) | 35(1) |
| C(27)  | 6021(8)  | 5479(2) | 3711(2) | 26(1) |
| C(34)  | 5223(8)  | 5689(2) | 4353(2) | 49(2) |
| C(35)  | 7915(5)  | 5498(2) | 3952(2) | 44(1) |
| C(27X) | 5538(17) | 5470(8) | 3784(9) | 24(4) |
| C(34X) | 4259(16) | 5626(6) | 4250(5) | 28(3) |
| C(35X) | 7264(16) | 5526(6) | 4212(7) | 36(3) |
| C(36)  | 9483(3)  | 5566(1) | 1725(1) | 31(1) |
| C(37)  | 10214(3) | 5437(1) | 1047(1) | 33(1) |
| C(38)  | 9792(2)  | 6109(1) | 526(1)  | 28(1) |
| N(3)   | 7993(2)  | 6269(1) | 386(1)  | 22(1) |
| C(40)  | 7281(2)  | 6675(1) | -300(1) | 24(1) |
| C(41)  | 6694(3)  | 7484(1) | -177(1) | 25(1) |
| C(42)  | 4995(3)  | 7528(1) | 39(1)   | 27(1) |
| C(43)  | 4875(2)  | 7118(1) | 748(1)  | 26(1) |
| C(44)  | 5245(2)  | 6257(1) | 731(1)  | 24(1) |
| C(45)  | 7079(2)  | 6086(1) | 874(1)  | 21(1) |
| N(4)   | 7725(2)  | 5767(1) | 1502(1) | 24(1) |
| B(4)   | 1333(3)  | 4044(1) | 3426(1) | 26(1) |
| O(12)  | 2791(2)  | 4027(1) | 3934(1) | 42(1) |
| O(13)  | 1261(2)  | 4167(1) | 2701(1) | 26(1) |
| O(14)  | -112(2)  | 3935(1) | 3670(1) | 37(1) |

---

**Table 3.** Bond lengths [Å] and angles [°] for compound **34**

---

|              |          |
|--------------|----------|
| B(1)-O(2)    | 1.462(2) |
| B(1)-O(1)    | 1.463(2) |
| B(1)-O(3)    | 1.478(2) |
| B(1)-O(4)    | 1.483(2) |
| O(1)-C(1)    | 1.425(2) |
| O(2)-C(2)    | 1.429(2) |
| O(3)-C(3)    | 1.432(2) |
| O(4)-C(4)    | 1.435(2) |
| C(1)-C(5)    | 1.523(2) |
| C(1)-C(6)    | 1.528(2) |
| C(1)-C(2)    | 1.566(2) |
| C(2)-C(7)    | 1.521(3) |
| C(2)-C(8)    | 1.528(2) |
| C(3)-C(10)   | 1.521(3) |
| C(3)-C(9)    | 1.529(3) |
| C(3)-C(4)    | 1.554(2) |
| C(4)-C(11)   | 1.522(2) |
| C(4)-C(12)   | 1.528(3) |
| C(5)-H(5A)   | 0.9800   |
| C(5)-H(5B)   | 0.9800   |
| C(5)-H(5C)   | 0.9800   |
| C(6)-H(6A)   | 0.9800   |
| C(6)-H(6B)   | 0.9800   |
| C(6)-H(6C)   | 0.9800   |
| C(7)-H(7A)   | 0.9800   |
| C(7)-H(7B)   | 0.9800   |
| C(7)-H(7C)   | 0.9800   |
| C(8)-H(8A)   | 0.9800   |
| C(8)-H(8B)   | 0.9800   |
| C(8)-H(8C)   | 0.9800   |
| C(9)-H(9A)   | 0.9800   |
| C(9)-H(9B)   | 0.9800   |
| C(9)-H(9C)   | 0.9800   |
| C(10)-H(10A) | 0.9800   |

|              |          |
|--------------|----------|
| C(10)-H(10B) | 0.9800   |
| C(10)-H(10C) | 0.9800   |
| C(11)-H(11A) | 0.9800   |
| C(11)-H(11B) | 0.9800   |
| C(11)-H(11C) | 0.9800   |
| C(12)-H(12A) | 0.9800   |
| C(12)-H(12B) | 0.9800   |
| C(12)-H(12C) | 0.9800   |
| C(13)-N(2)   | 1.463(2) |
| C(13)-C(14)  | 1.515(3) |
| C(13)-H(13A) | 0.9900   |
| C(13)-H(13B) | 0.9900   |
| C(14)-C(15)  | 1.519(3) |
| C(14)-H(14A) | 0.9900   |
| C(14)-H(14B) | 0.9900   |
| C(15)-N(1)   | 1.469(2) |
| C(15)-H(15A) | 0.9900   |
| C(15)-H(15B) | 0.9900   |
| N(1)-C(22)   | 1.323(2) |
| N(1)-C(17)   | 1.480(2) |
| C(17)-C(18)  | 1.526(3) |
| C(17)-H(17A) | 0.9900   |
| C(17)-H(17B) | 0.9900   |
| C(18)-C(19)  | 1.524(3) |
| C(18)-H(18A) | 0.9900   |
| C(18)-H(18B) | 0.9900   |
| C(19)-C(20)  | 1.526(3) |
| C(19)-H(19A) | 0.9900   |
| C(19)-H(19B) | 0.9900   |
| C(20)-C(21)  | 1.537(3) |
| C(20)-H(20A) | 0.9900   |
| C(20)-H(20B) | 0.9900   |
| C(21)-C(22)  | 1.501(2) |
| C(21)-H(21A) | 0.9900   |

|              |          |
|--------------|----------|
| C(21)-H(21B) | 0.9900   |
| C(22)-N(2)   | 1.312(2) |
| N(2)-H(2N)   | 0.90(3)  |
| B(2)-O(7)    | 1.358(2) |
| B(2)-O(5)    | 1.364(2) |
| B(2)-O(6)    | 1.373(3) |
| O(5)-H(5O)   | 0.81(3)  |
| O(6)-H(6O)   | 0.83(3)  |
| O(7)-H(7O)   | 0.80(3)  |
| B(3)-O(8)    | 1.461(2) |
| B(3)-O(9)    | 1.466(2) |
| B(3)-O(11)   | 1.471(2) |
| B(3)-O(10)   | 1.482(2) |
| O(8)-C(24)   | 1.437(2) |
| O(9)-C(25)   | 1.425(2) |
| O(10)-C(26)  | 1.429(2) |
| O(11)-C(27)  | 1.449(4) |
| C(24)-C(29)  | 1.522(3) |
| C(24)-C(28)  | 1.534(3) |
| C(24)-C(25)  | 1.551(3) |
| C(25)-C(31)  | 1.523(2) |
| C(25)-C(30)  | 1.523(3) |
| C(26)-C(32)  | 1.519(3) |
| C(26)-C(33)  | 1.521(3) |
| C(26)-C(27)  | 1.543(4) |
| C(28)-H(28A) | 0.9800   |
| C(28)-H(28B) | 0.9800   |
| C(28)-H(28C) | 0.9800   |
| C(29)-H(29A) | 0.9800   |
| C(29)-H(29B) | 0.9800   |
| C(29)-H(29C) | 0.9800   |
| C(30)-H(30A) | 0.9800   |
| C(30)-H(30B) | 0.9800   |
| C(30)-H(30C) | 0.9800   |



|              |          |
|--------------|----------|
| C(31)-H(31A) | 0.9800   |
| C(31)-H(31B) | 0.9800   |
| C(31)-H(31C) | 0.9800   |
| C(32)-H(32A) | 0.9800   |
| C(32)-H(32B) | 0.9800   |
| C(32)-H(32C) | 0.9800   |
| C(33)-H(33A) | 0.9800   |
| C(33)-H(33B) | 0.9800   |
| C(33)-H(33C) | 0.9800   |
| C(27)-C(34)  | 1.514(5) |
| C(27)-C(35)  | 1.526(7) |
| C(34)-H(34A) | 0.9800   |
| C(34)-H(34B) | 0.9800   |
| C(34)-H(34C) | 0.9800   |
| C(35)-H(35A) | 0.9800   |
| C(35)-H(35B) | 0.9800   |
| C(35)-H(35C) | 0.9800   |
| C(36)-N(4)   | 1.459(3) |
| C(36)-C(37)  | 1.518(3) |
| C(36)-H(36A) | 0.9900   |
| C(36)-H(36B) | 0.9900   |
| C(37)-C(38)  | 1.521(3) |
| C(37)-H(37A) | 0.9900   |
| C(37)-H(37B) | 0.9900   |
| C(38)-N(3)   | 1.470(2) |
| C(38)-H(38A) | 0.9900   |
| C(38)-H(38B) | 0.9900   |
| N(3)-C(45)   | 1.325(2) |
| N(3)-C(40)   | 1.478(2) |
| C(40)-C(41)  | 1.528(3) |
| C(40)-H(40A) | 0.9900   |
| C(40)-H(40B) | 0.9900   |
| C(41)-C(42)  | 1.522(3) |
| C(41)-H(41A) | 0.9900   |

|                |            |
|----------------|------------|
| C(41)-H(41B)   | 0.9900     |
| C(42)-C(43)    | 1.524(3)   |
| C(42)-H(42A)   | 0.9900     |
| C(42)-H(42B)   | 0.9900     |
| C(43)-C(44)    | 1.541(3)   |
| C(43)-H(43A)   | 0.9900     |
| C(43)-H(43B)   | 0.9900     |
| C(44)-C(45)    | 1.501(3)   |
| C(44)-H(44A)   | 0.9900     |
| C(44)-H(44B)   | 0.9900     |
| C(45)-N(4)     | 1.309(3)   |
| N(4)-H(4N)     | 0.84(3)    |
| B(4)-O(13)     | 1.358(3)   |
| B(4)-O(14)     | 1.360(3)   |
| B(4)-O(12)     | 1.368(3)   |
| O(12)-H(12O)   | 0.91(4)    |
| O(13)-H(13O)   | 0.91(3)    |
| O(14)-H(14O)   | 0.82(4)    |
| O(2)-B(1)-O(1) | 104.25(14) |
| O(2)-B(1)-O(3) | 116.52(14) |
| O(1)-B(1)-O(3) | 108.37(13) |
| O(2)-B(1)-O(4) | 109.15(13) |
| O(1)-B(1)-O(4) | 115.50(14) |
| O(3)-B(1)-O(4) | 103.50(14) |
| C(1)-O(1)-B(1) | 109.89(13) |
| C(2)-O(2)-B(1) | 110.20(13) |
| C(3)-O(3)-B(1) | 109.30(12) |
| C(4)-O(4)-B(1) | 109.49(13) |
| O(1)-C(1)-C(5) | 108.68(14) |
| O(1)-C(1)-C(6) | 108.79(15) |
| C(5)-C(1)-C(6) | 109.42(15) |
| O(1)-C(1)-C(2) | 101.89(13) |
| C(5)-C(1)-C(2) | 112.79(15) |

|                  |            |
|------------------|------------|
| C(6)-C(1)-C(2)   | 114.83(15) |
| O(2)-C(2)-C(7)   | 108.68(14) |
| O(2)-C(2)-C(8)   | 108.60(14) |
| C(7)-C(2)-C(8)   | 110.09(15) |
| O(2)-C(2)-C(1)   | 102.62(13) |
| C(7)-C(2)-C(1)   | 114.40(15) |
| C(8)-C(2)-C(1)   | 112.03(14) |
| O(3)-C(3)-C(10)  | 108.92(14) |
| O(3)-C(3)-C(9)   | 108.72(14) |
| C(10)-C(3)-C(9)  | 109.96(16) |
| O(3)-C(3)-C(4)   | 102.29(13) |
| C(10)-C(3)-C(4)  | 114.55(16) |
| C(9)-C(3)-C(4)   | 111.98(14) |
| O(4)-C(4)-C(11)  | 109.01(14) |
| O(4)-C(4)-C(12)  | 108.16(14) |
| C(11)-C(4)-C(12) | 109.76(15) |
| O(4)-C(4)-C(3)   | 101.78(13) |
| C(11)-C(4)-C(3)  | 114.67(15) |
| C(12)-C(4)-C(3)  | 112.95(15) |
| C(1)-C(5)-H(5A)  | 109.5      |
| C(1)-C(5)-H(5B)  | 109.5      |
| H(5A)-C(5)-H(5B) | 109.5      |
| C(1)-C(5)-H(5C)  | 109.5      |
| H(5A)-C(5)-H(5C) | 109.5      |
| H(5B)-C(5)-H(5C) | 109.5      |
| C(1)-C(6)-H(6A)  | 109.5      |
| C(1)-C(6)-H(6B)  | 109.5      |
| H(6A)-C(6)-H(6B) | 109.5      |
| C(1)-C(6)-H(6C)  | 109.5      |
| H(6A)-C(6)-H(6C) | 109.5      |
| H(6B)-C(6)-H(6C) | 109.5      |
| C(2)-C(7)-H(7A)  | 109.5      |
| C(2)-C(7)-H(7B)  | 109.5      |
| H(7A)-C(7)-H(7B) | 109.5      |

|                     |            |
|---------------------|------------|
| C(2)-C(7)-H(7C)     | 109.5      |
| H(7A)-C(7)-H(7C)    | 109.5      |
| H(7B)-C(7)-H(7C)    | 109.5      |
| C(2)-C(8)-H(8A)     | 109.5      |
| C(2)-C(8)-H(8B)     | 109.5      |
| H(8A)-C(8)-H(8B)    | 109.5      |
| C(2)-C(8)-H(8C)     | 109.5      |
| H(8A)-C(8)-H(8C)    | 109.5      |
| H(8B)-C(8)-H(8C)    | 109.5      |
| C(3)-C(9)-H(9A)     | 109.5      |
| C(3)-C(9)-H(9B)     | 109.5      |
| H(9A)-C(9)-H(9B)    | 109.5      |
| C(3)-C(9)-H(9C)     | 109.5      |
| H(9A)-C(9)-H(9C)    | 109.5      |
| H(9B)-C(9)-H(9C)    | 109.5      |
| C(3)-C(10)-H(10A)   | 109.5      |
| C(3)-C(10)-H(10B)   | 109.5      |
| H(10A)-C(10)-H(10B) | 109.5      |
| C(3)-C(10)-H(10C)   | 109.5      |
| H(10A)-C(10)-H(10C) | 109.5      |
| H(10B)-C(10)-H(10C) | 109.5      |
| C(4)-C(11)-H(11A)   | 109.5      |
| C(4)-C(11)-H(11B)   | 109.5      |
| H(11A)-C(11)-H(11B) | 109.5      |
| C(4)-C(11)-H(11C)   | 109.5      |
| H(11A)-C(11)-H(11C) | 109.5      |
| H(11B)-C(11)-H(11C) | 109.5      |
| C(4)-C(12)-H(12A)   | 109.5      |
| C(4)-C(12)-H(12B)   | 109.5      |
| H(12A)-C(12)-H(12B) | 109.5      |
| C(4)-C(12)-H(12C)   | 109.5      |
| H(12A)-C(12)-H(12C) | 109.5      |
| H(12B)-C(12)-H(12C) | 109.5      |
| N(2)-C(13)-C(14)    | 108.51(15) |

|                     |            |
|---------------------|------------|
| N(2)-C(13)-H(13A)   | 110.0      |
| C(14)-C(13)-H(13A)  | 110.0      |
| N(2)-C(13)-H(13B)   | 110.0      |
| C(14)-C(13)-H(13B)  | 110.0      |
| H(13A)-C(13)-H(13B) | 108.4      |
| C(13)-C(14)-C(15)   | 109.80(16) |
| C(13)-C(14)-H(14A)  | 109.7      |
| C(15)-C(14)-H(14A)  | 109.7      |
| C(13)-C(14)-H(14B)  | 109.7      |
| C(15)-C(14)-H(14B)  | 109.7      |
| H(14A)-C(14)-H(14B) | 108.2      |
| N(1)-C(15)-C(14)    | 111.58(14) |
| N(1)-C(15)-H(15A)   | 109.3      |
| C(14)-C(15)-H(15A)  | 109.3      |
| N(1)-C(15)-H(15B)   | 109.3      |
| C(14)-C(15)-H(15B)  | 109.3      |
| H(15A)-C(15)-H(15B) | 108.0      |
| C(22)-N(1)-C(15)    | 121.84(15) |
| C(22)-N(1)-C(17)    | 121.99(16) |
| C(15)-N(1)-C(17)    | 116.08(14) |
| N(1)-C(17)-C(18)    | 113.11(14) |
| N(1)-C(17)-H(17A)   | 109.0      |
| C(18)-C(17)-H(17A)  | 109.0      |
| N(1)-C(17)-H(17B)   | 109.0      |
| C(18)-C(17)-H(17B)  | 109.0      |
| H(17A)-C(17)-H(17B) | 107.8      |
| C(19)-C(18)-C(17)   | 114.02(16) |
| C(19)-C(18)-H(18A)  | 108.7      |
| C(17)-C(18)-H(18A)  | 108.7      |
| C(19)-C(18)-H(18B)  | 108.7      |
| C(17)-C(18)-H(18B)  | 108.7      |
| H(18A)-C(18)-H(18B) | 107.6      |
| C(18)-C(19)-C(20)   | 115.69(17) |
| C(18)-C(19)-H(19A)  | 108.4      |

|                     |            |
|---------------------|------------|
| C(20)-C(19)-H(19A)  | 108.4      |
| C(18)-C(19)-H(19B)  | 108.4      |
| C(20)-C(19)-H(19B)  | 108.4      |
| H(19A)-C(19)-H(19B) | 107.4      |
| C(19)-C(20)-C(21)   | 114.66(15) |
| C(19)-C(20)-H(20A)  | 108.6      |
| C(21)-C(20)-H(20A)  | 108.6      |
| C(19)-C(20)-H(20B)  | 108.6      |
| C(21)-C(20)-H(20B)  | 108.6      |
| H(20A)-C(20)-H(20B) | 107.6      |
| C(22)-C(21)-C(20)   | 113.34(15) |
| C(22)-C(21)-H(21A)  | 108.9      |
| C(20)-C(21)-H(21A)  | 108.9      |
| C(22)-C(21)-H(21B)  | 108.9      |
| C(20)-C(21)-H(21B)  | 108.9      |
| H(21A)-C(21)-H(21B) | 107.7      |
| N(2)-C(22)-N(1)     | 122.05(17) |
| N(2)-C(22)-C(21)    | 117.58(15) |
| N(1)-C(22)-C(21)    | 120.35(15) |
| C(22)-N(2)-C(13)    | 122.58(15) |
| C(22)-N(2)-H(2N)    | 120.3(15)  |
| C(13)-N(2)-H(2N)    | 117.1(15)  |
| O(7)-B(2)-O(5)      | 119.81(17) |
| O(7)-B(2)-O(6)      | 117.15(17) |
| O(5)-B(2)-O(6)      | 123.04(17) |
| B(2)-O(5)-H(5O)     | 114(2)     |
| B(2)-O(6)-H(6O)     | 111.5(19)  |
| B(2)-O(7)-H(7O)     | 112(2)     |
| O(8)-B(3)-O(9)      | 104.40(14) |
| O(8)-B(3)-O(11)     | 116.95(15) |
| O(9)-B(3)-O(11)     | 108.75(14) |
| O(8)-B(3)-O(10)     | 109.19(14) |
| O(9)-B(3)-O(10)     | 114.41(15) |
| O(11)-B(3)-O(10)    | 103.53(14) |

|                     |            |
|---------------------|------------|
| C(24)-O(8)-B(3)     | 109.36(14) |
| C(25)-O(9)-B(3)     | 109.91(13) |
| C(26)-O(10)-B(3)    | 109.65(13) |
| C(27)-O(11)-B(3)    | 106.7(2)   |
| O(8)-C(24)-C(29)    | 108.47(16) |
| O(8)-C(24)-C(28)    | 108.52(15) |
| C(29)-C(24)-C(28)   | 109.72(17) |
| O(8)-C(24)-C(25)    | 102.82(14) |
| C(29)-C(24)-C(25)   | 115.02(17) |
| C(28)-C(24)-C(25)   | 111.87(16) |
| O(9)-C(25)-C(31)    | 108.43(15) |
| O(9)-C(25)-C(30)    | 108.81(15) |
| C(31)-C(25)-C(30)   | 109.42(15) |
| O(9)-C(25)-C(24)    | 102.16(13) |
| C(31)-C(25)-C(24)   | 112.61(16) |
| C(30)-C(25)-C(24)   | 114.96(16) |
| O(10)-C(26)-C(32)   | 108.39(15) |
| O(10)-C(26)-C(33)   | 109.33(16) |
| C(32)-C(26)-C(33)   | 109.33(16) |
| O(10)-C(26)-C(27)   | 99.63(19)  |
| C(32)-C(26)-C(27)   | 116.2(3)   |
| C(33)-C(26)-C(27)   | 113.3(2)   |
| C(24)-C(28)-H(28A)  | 109.5      |
| C(24)-C(28)-H(28B)  | 109.5      |
| H(28A)-C(28)-H(28B) | 109.5      |
| C(24)-C(28)-H(28C)  | 109.5      |
| H(28A)-C(28)-H(28C) | 109.5      |
| H(28B)-C(28)-H(28C) | 109.5      |
| C(24)-C(29)-H(29A)  | 109.5      |
| C(24)-C(29)-H(29B)  | 109.5      |
| H(29A)-C(29)-H(29B) | 109.5      |
| C(24)-C(29)-H(29C)  | 109.5      |
| H(29A)-C(29)-H(29C) | 109.5      |
| H(29B)-C(29)-H(29C) | 109.5      |

|                     |          |
|---------------------|----------|
| C(25)-C(30)-H(30A)  | 109.5    |
| C(25)-C(30)-H(30B)  | 109.5    |
| H(30A)-C(30)-H(30B) | 109.5    |
| C(25)-C(30)-H(30C)  | 109.5    |
| H(30A)-C(30)-H(30C) | 109.5    |
| H(30B)-C(30)-H(30C) | 109.5    |
| C(25)-C(31)-H(31A)  | 109.5    |
| C(25)-C(31)-H(31B)  | 109.5    |
| H(31A)-C(31)-H(31B) | 109.5    |
| C(25)-C(31)-H(31C)  | 109.5    |
| H(31A)-C(31)-H(31C) | 109.5    |
| H(31B)-C(31)-H(31C) | 109.5    |
| C(26)-C(32)-H(32A)  | 109.5    |
| C(26)-C(32)-H(32B)  | 109.5    |
| H(32A)-C(32)-H(32B) | 109.5    |
| C(26)-C(32)-H(32C)  | 109.5    |
| H(32A)-C(32)-H(32C) | 109.5    |
| H(32B)-C(32)-H(32C) | 109.5    |
| C(26)-C(33)-H(33A)  | 109.5    |
| C(26)-C(33)-H(33B)  | 109.5    |
| H(33A)-C(33)-H(33B) | 109.5    |
| C(26)-C(33)-H(33C)  | 109.5    |
| H(33A)-C(33)-H(33C) | 109.5    |
| H(33B)-C(33)-H(33C) | 109.5    |
| O(11)-C(27)-C(34)   | 107.8(3) |
| O(11)-C(27)-C(35)   | 110.1(3) |
| C(34)-C(27)-C(35)   | 109.4(3) |
| O(11)-C(27)-C(26)   | 102.1(2) |
| C(34)-C(27)-C(26)   | 113.7(3) |
| C(35)-C(27)-C(26)   | 113.3(3) |
| C(27)-C(34)-H(34A)  | 109.5    |
| C(27)-C(34)-H(34B)  | 109.5    |
| H(34A)-C(34)-H(34B) | 109.5    |
| C(27)-C(34)-H(34C)  | 109.5    |



|                     |            |
|---------------------|------------|
| H(34A)-C(34)-H(34C) | 109.5      |
| H(34B)-C(34)-H(34C) | 109.5      |
| C(27)-C(35)-H(35A)  | 109.5      |
| C(27)-C(35)-H(35B)  | 109.5      |
| H(35A)-C(35)-H(35B) | 109.5      |
| C(27)-C(35)-H(35C)  | 109.5      |
| H(35A)-C(35)-H(35C) | 109.5      |
| H(35B)-C(35)-H(35C) | 109.5      |
| N(4)-C(36)-C(37)    | 109.03(16) |
| N(4)-C(36)-H(36A)   | 109.9      |
| C(37)-C(36)-H(36A)  | 109.9      |
| N(4)-C(36)-H(36B)   | 109.9      |
| C(37)-C(36)-H(36B)  | 109.9      |
| H(36A)-C(36)-H(36B) | 108.3      |
| C(36)-C(37)-C(38)   | 109.76(16) |
| C(36)-C(37)-H(37A)  | 109.7      |
| C(38)-C(37)-H(37A)  | 109.7      |
| C(36)-C(37)-H(37B)  | 109.7      |
| C(38)-C(37)-H(37B)  | 109.7      |
| H(37A)-C(37)-H(37B) | 108.2      |
| N(3)-C(38)-C(37)    | 110.77(16) |
| N(3)-C(38)-H(38A)   | 109.5      |
| C(37)-C(38)-H(38A)  | 109.5      |
| N(3)-C(38)-H(38B)   | 109.5      |
| C(37)-C(38)-H(38B)  | 109.5      |
| H(38A)-C(38)-H(38B) | 108.1      |
| C(45)-N(3)-C(38)    | 120.82(16) |
| C(45)-N(3)-C(40)    | 122.01(16) |
| C(38)-N(3)-C(40)    | 117.10(14) |
| N(3)-C(40)-C(41)    | 113.46(14) |
| N(3)-C(40)-H(40A)   | 108.9      |
| C(41)-C(40)-H(40A)  | 108.9      |
| N(3)-C(40)-H(40B)   | 108.9      |
| C(41)-C(40)-H(40B)  | 108.9      |

|                     |            |
|---------------------|------------|
| H(40A)-C(40)-H(40B) | 107.7      |
| C(42)-C(41)-C(40)   | 114.63(16) |
| C(42)-C(41)-H(41A)  | 108.6      |
| C(40)-C(41)-H(41A)  | 108.6      |
| C(42)-C(41)-H(41B)  | 108.6      |
| C(40)-C(41)-H(41B)  | 108.6      |
| H(41A)-C(41)-H(41B) | 107.6      |
| C(41)-C(42)-C(43)   | 114.98(16) |
| C(41)-C(42)-H(42A)  | 108.5      |
| C(43)-C(42)-H(42A)  | 108.5      |
| C(41)-C(42)-H(42B)  | 108.5      |
| C(43)-C(42)-H(42B)  | 108.5      |
| H(42A)-C(42)-H(42B) | 107.5      |
| C(42)-C(43)-C(44)   | 113.42(15) |
| C(42)-C(43)-H(43A)  | 108.9      |
| C(44)-C(43)-H(43A)  | 108.9      |
| C(42)-C(43)-H(43B)  | 108.9      |
| C(44)-C(43)-H(43B)  | 108.9      |
| H(43A)-C(43)-H(43B) | 107.7      |
| C(45)-C(44)-C(43)   | 112.63(15) |
| C(45)-C(44)-H(44A)  | 109.1      |
| C(43)-C(44)-H(44A)  | 109.1      |
| C(45)-C(44)-H(44B)  | 109.1      |
| C(43)-C(44)-H(44B)  | 109.1      |
| H(44A)-C(44)-H(44B) | 107.8      |
| N(4)-C(45)-N(3)     | 122.20(18) |
| N(4)-C(45)-C(44)    | 117.19(16) |
| N(3)-C(45)-C(44)    | 120.60(16) |
| C(45)-N(4)-C(36)    | 124.02(16) |
| C(45)-N(4)-H(4N)    | 117.3(17)  |
| C(36)-N(4)-H(4N)    | 118.7(17)  |
| O(13)-B(4)-O(14)    | 118.94(19) |
| O(13)-B(4)-O(12)    | 123.55(19) |
| O(14)-B(4)-O(12)    | 117.51(18) |

|                   |           |
|-------------------|-----------|
| B(4)-O(12)-H(12O) | 109(2)    |
| B(4)-O(13)-H(13O) | 113.6(17) |
| B(4)-O(14)-H(14O) | 112(2)    |

---

Symmetry transformations used to generate equivalent atoms:

**Table 4.** Anisotropic displacement parameters ( $\text{\AA}^2 \times 10^3$ ) for compound **34**. The anisotropic displacement factor exponent takes the form:  $-2p^2 [ h^2 a^* 2U^{11} + \dots + 2 h k a^* b^* U^{12} ]$

---

|       | U <sup>11</sup> | U <sup>22</sup> | U <sup>33</sup> | U <sup>23</sup> | U <sup>13</sup> | U <sup>12</sup> |
|-------|-----------------|-----------------|-----------------|-----------------|-----------------|-----------------|
| B(1)  | 17(1)           | 19(1)           | 19(1)           | 2(1)            | 5(1)            | 1(1)            |
| O(1)  | 17(1)           | 19(1)           | 25(1)           | -3(1)           | 5(1)            | -1(1)           |
| O(2)  | 18(1)           | 19(1)           | 20(1)           | -2(1)           | 5(1)            | -2(1)           |
| O(3)  | 23(1)           | 17(1)           | 18(1)           | 0(1)            | 8(1)            | -2(1)           |
| O(4)  | 23(1)           | 18(1)           | 18(1)           | 0(1)            | 5(1)            | -4(1)           |
| C(1)  | 24(1)           | 17(1)           | 20(1)           | -2(1)           | 7(1)            | -1(1)           |
| C(2)  | 22(1)           | 19(1)           | 19(1)           | -1(1)           | 4(1)            | 0(1)            |
| C(3)  | 27(1)           | 16(1)           | 22(1)           | -2(1)           | 10(1)           | 0(1)            |
| C(4)  | 23(1)           | 20(1)           | 20(1)           | -4(1)           | 5(1)            | -2(1)           |
| C(5)  | 32(1)           | 20(1)           | 26(1)           | 3(1)            | 5(1)            | 1(1)            |
| C(6)  | 33(1)           | 24(1)           | 28(1)           | -3(1)           | 10(1)           | 6(1)            |
| C(7)  | 27(1)           | 27(1)           | 32(1)           | -6(1)           | 4(1)            | -7(1)           |
| C(8)  | 32(1)           | 32(1)           | 19(1)           | 0(1)            | 6(1)            | 4(1)            |
| C(9)  | 33(1)           | 24(1)           | 26(1)           | -1(1)           | 7(1)            | 8(1)            |
| C(10) | 43(1)           | 21(1)           | 32(1)           | -3(1)           | 12(1)           | -7(1)           |
| C(11) | 29(1)           | 26(1)           | 23(1)           | -5(1)           | 8(1)            | -3(1)           |
| C(12) | 25(1)           | 27(1)           | 26(1)           | -5(1)           | 3(1)            | -1(1)           |
| C(13) | 24(1)           | 27(1)           | 28(1)           | -3(1)           | 4(1)            | -6(1)           |
| C(14) | 20(1)           | 29(1)           | 27(1)           | 4(1)            | 2(1)            | 1(1)            |
| C(15) | 21(1)           | 32(1)           | 28(1)           | 3(1)            | 9(1)            | 5(1)            |
| N(1)  | 24(1)           | 24(1)           | 17(1)           | 0(1)            | 5(1)            | 4(1)            |

---

|       |        |       |       |        |        |       |
|-------|--------|-------|-------|--------|--------|-------|
| C(17) | 34(1)  | 29(1) | 17(1) | -2(1)  | 6(1)   | 7(1)  |
| C(18) | 44(1)  | 22(1) | 20(1) | -4(1)  | 2(1)   | 7(1)  |
| C(19) | 38(1)  | 22(1) | 27(1) | -1(1)  | -1(1)  | -3(1) |
| C(20) | 23(1)  | 25(1) | 25(1) | 1(1)   | 4(1)   | -2(1) |
| C(21) | 20(1)  | 22(1) | 22(1) | -2(1)  | 2(1)   | 1(1)  |
| C(22) | 21(1)  | 18(1) | 16(1) | 3(1)   | 4(1)   | 2(1)  |
| N(2)  | 21(1)  | 22(1) | 19(1) | -3(1)  | 6(1)   | 0(1)  |
| B(2)  | 19(1)  | 28(1) | 15(1) | -1(1)  | 4(1)   | 0(1)  |
| O(5)  | 17(1)  | 31(1) | 28(1) | 8(1)   | 6(1)   | 2(1)  |
| O(6)  | 21(1)  | 34(1) | 26(1) | 10(1)  | 8(1)   | 4(1)  |
| O(7)  | 20(1)  | 34(1) | 27(1) | 8(1)   | 8(1)   | 3(1)  |
| B(3)  | 20(1)  | 17(1) | 19(1) | 1(1)   | 6(1)   | -2(1) |
| O(8)  | 20(1)  | 19(1) | 29(1) | -3(1)  | 6(1)   | -1(1) |
| O(9)  | 21(1)  | 23(1) | 23(1) | -6(1)  | 7(1)   | -1(1) |
| O(10) | 29(1)  | 18(1) | 25(1) | 1(1)   | 13(1)  | 0(1)  |
| O(11) | 38(1)  | 17(1) | 18(1) | -1(1)  | 5(1)   | 0(1)  |
| C(24) | 25(1)  | 20(1) | 29(1) | -3(1)  | 7(1)   | 0(1)  |
| C(25) | 28(1)  | 20(1) | 19(1) | -3(1)  | 7(1)   | 0(1)  |
| C(26) | 33(1)  | 17(1) | 21(1) | -3(1)  | 6(1)   | 0(1)  |
| C(28) | 39(1)  | 23(1) | 33(1) | 0(1)   | -3(1)  | -1(1) |
| C(29) | 35(1)  | 30(1) | 55(1) | -12(1) | 19(1)  | 1(1)  |
| C(30) | 32(1)  | 26(1) | 27(1) | -6(1)  | 6(1)   | -5(1) |
| C(31) | 51(1)  | 26(1) | 20(1) | -1(1)  | 7(1)   | -3(1) |
| C(32) | 36(1)  | 22(1) | 50(1) | 0(1)   | 18(1)  | 6(1)  |
| C(33) | 41(1)  | 21(1) | 42(1) | -2(1)  | 5(1)   | -6(1) |
| C(27) | 46(3)  | 17(2) | 16(2) | -3(1)  | 7(2)   | -3(1) |
| C(34) | 101(5) | 24(2) | 26(2) | -4(1)  | 26(2)  | 1(2)  |
| C(35) | 51(2)  | 27(2) | 43(2) | -2(1)  | -22(2) | -6(1) |
| C(36) | 26(1)  | 33(1) | 34(1) | 10(1)  | 7(1)   | 7(1)  |
| C(37) | 25(1)  | 36(1) | 39(1) | 4(1)   | 9(1)   | 9(1)  |
| C(38) | 24(1)  | 33(1) | 28(1) | 0(1)   | 11(1)  | 2(1)  |
| N(3)  | 24(1)  | 23(1) | 21(1) | 1(1)   | 8(1)   | 3(1)  |
| C(40) | 29(1)  | 26(1) | 17(1) | -1(1)  | 6(1)   | -1(1) |
| C(41) | 34(1)  | 22(1) | 19(1) | 0(1)   | 5(1)   | -2(1) |

|       |       |       |       |       |       |       |
|-------|-------|-------|-------|-------|-------|-------|
| C(42) | 34(1) | 23(1) | 24(1) | 2(1)  | 2(1)  | 7(1)  |
| C(43) | 24(1) | 30(1) | 26(1) | 1(1)  | 7(1)  | 7(1)  |
| C(44) | 23(1) | 25(1) | 24(1) | 1(1)  | 7(1)  | -1(1) |
| C(45) | 26(1) | 16(1) | 24(1) | -2(1) | 8(1)  | -2(1) |
| N(4)  | 23(1) | 26(1) | 25(1) | 7(1)  | 8(1)  | 2(1)  |
| B(4)  | 23(1) | 30(1) | 27(1) | 10(1) | 7(1)  | 2(1)  |
| O(12) | 23(1) | 75(1) | 27(1) | 19(1) | 5(1)  | 1(1)  |
| O(13) | 19(1) | 37(1) | 24(1) | 5(1)  | 6(1)  | 1(1)  |
| O(14) | 24(1) | 58(1) | 30(1) | 18(1) | 10(1) | 3(1)  |

**Table 5.** Hydrogen coordinates (  $\times 10^4$ ) and isotropic displacement parameters ( $\text{\AA}^2 \times 10^3$ ) for compound **34**

|       | x     | y     | z    | U(eq) |
|-------|-------|-------|------|-------|
| H(5A) | -588  | 11719 | 2211 | 39    |
| H(5B) | 988   | 11291 | 2006 | 39    |
| H(5C) | 1260  | 11998 | 2561 | 39    |
| H(6A) | -1420 | 11541 | 3343 | 41    |
| H(6B) | 327   | 11811 | 3824 | 41    |
| H(6C) | -427  | 10996 | 3970 | 41    |
| H(7A) | 4860  | 11063 | 3561 | 43    |
| H(7B) | 3593  | 11745 | 3620 | 43    |
| H(7C) | 3774  | 11429 | 2833 | 43    |
| H(8A) | 3679  | 10230 | 4331 | 42    |
| H(8B) | 1758  | 9983  | 4142 | 42    |
| H(8C) | 2265  | 10815 | 4463 | 42    |
| H(9A) | 2681  | 7871  | 2721 | 41    |
| H(9B) | 3174  | 8627  | 2331 | 41    |
| H(9C) | 2507  | 7893  | 1850 | 41    |

|        |          |           |          |    |
|--------|----------|-----------|----------|----|
| H(10A) | -139     | 7531      | 2702     | 47 |
| H(10B) | -617     | 7490      | 1827     | 47 |
| H(10C) | -1672    | 8020      | 2268     | 47 |
| H(11A) | 383      | 9078      | 435      | 38 |
| H(11B) | 332      | 8212      | 704      | 38 |
| H(11C) | 1977     | 8715      | 961      | 38 |
| H(12A) | -2047    | 9442      | 867      | 39 |
| H(12B) | -2184    | 9359      | 1709     | 39 |
| H(12C) | -2348    | 8621      | 1194     | 39 |
| H(13A) | 4863     | 9843      | 6746     | 32 |
| H(13B) | 4890     | 10109     | 5923     | 32 |
| H(14A) | 5419     | 8578      | 6467     | 31 |
| H(14B) | 6805     | 9106      | 6214     | 31 |
| H(15A) | 5511     | 9033      | 5000     | 32 |
| H(15B) | 5542     | 8176      | 5299     | 32 |
| H(17A) | 3507     | 8101      | 4188     | 32 |
| H(17B) | 1742     | 8517      | 4118     | 32 |
| H(18A) | 1737     | 7111      | 4176     | 35 |
| H(18B) | 2521     | 7205      | 5029     | 35 |
| H(19A) | -350     | 7021      | 4879     | 36 |
| H(19B) | -707     | 7720      | 4320     | 36 |
| H(20A) | 602      | 7866      | 5855     | 29 |
| H(20B) | -1275    | 8058      | 5469     | 29 |
| H(21A) | -28      | 9048      | 4780     | 26 |
| H(21B) | -139     | 9232      | 5610     | 26 |
| H(2N)  | 2130(30) | 9742(14)  | 6248(12) | 25 |
| H(5O)  | 7590(40) | 10065(16) | 2806(15) | 37 |
| H(6O)  | 8800(40) | 9004(16)  | 3365(15) | 40 |
| H(7O)  | 4460(40) | 9437(17)  | 3378(15) | 40 |
| H(28A) | 7622     | 2772      | 3025     | 50 |
| H(28B) | 5934     | 2423      | 2559     | 50 |
| H(28C) | 5855     | 3071      | 3157     | 50 |
| H(29A) | 8727     | 3153      | 1991     | 58 |
| H(29B) | 7726     | 3695      | 1364     | 58 |

|        |       |      |      |    |
|--------|-------|------|------|----|
| H(29C) | 7177  | 2824 | 1412 | 58 |
| H(30A) | 2333  | 3226 | 1451 | 42 |
| H(30B) | 3343  | 2835 | 2182 | 42 |
| H(30C) | 3826  | 2648 | 1409 | 42 |
| H(31A) | 3449  | 4223 | 851  | 48 |
| H(31B) | 5088  | 3769 | 753  | 48 |
| H(31C) | 5254  | 4579 | 1157 | 48 |
| H(32A) | 3231  | 6400 | 2381 | 52 |
| H(32B) | 3168  | 6374 | 3235 | 52 |
| H(32C) | 2912  | 5608 | 2759 | 52 |
| H(33A) | 5864  | 6964 | 2531 | 53 |
| H(33B) | 7489  | 6601 | 3035 | 53 |
| H(33C) | 6126  | 7024 | 3404 | 53 |
| H(34A) | 4006  | 5677 | 4198 | 73 |
| H(34B) | 5578  | 6203 | 4523 | 73 |
| H(34C) | 5569  | 5323 | 4752 | 73 |
| H(35A) | 8432  | 5363 | 3538 | 67 |
| H(35B) | 8262  | 5132 | 4351 | 67 |
| H(35C) | 8268  | 6012 | 4123 | 67 |
| H(34D) | 3137  | 5585 | 3948 | 42 |
| H(34E) | 4425  | 6142 | 4456 | 42 |
| H(34F) | 4387  | 5253 | 4649 | 42 |
| H(35D) | 8056  | 5422 | 3892 | 55 |
| H(35E) | 7421  | 5153 | 4612 | 55 |
| H(35F) | 7456  | 6041 | 4417 | 55 |
| H(36A) | 9597  | 5097 | 2027 | 37 |
| H(36B) | 10091 | 5983 | 2024 | 37 |
| H(37A) | 9755  | 4962 | 799  | 39 |
| H(37B) | 11440 | 5382 | 1189 | 39 |
| H(38A) | 10414 | 6566 | 742  | 33 |
| H(38B) | 10139 | 5993 | 58   | 33 |
| H(40A) | 6324  | 6378 | -570 | 28 |
| H(40B) | 8133  | 6701 | -611 | 28 |
| H(41A) | 7529  | 7728 | 213  | 30 |

|        |          |          |          |    |
|--------|----------|----------|----------|----|
| H(41B) | 6651     | 7782     | -632     | 30 |
| H(42A) | 4151     | 7309     | -363     | 33 |
| H(42B) | 4709     | 8072     | 88       | 33 |
| H(43A) | 3739     | 7190     | 847      | 32 |
| H(43B) | 5673     | 7354     | 1157     | 32 |
| H(44A) | 4737     | 5996     | 1104     | 28 |
| H(44B) | 4721     | 6050     | 245      | 28 |
| H(4N)  | 7080(30) | 5677(14) | 1790(14) | 29 |
| H(12O) | 3630(50) | 4220(20) | 3731(19) | 62 |
| H(13O) | 2280(40) | 4218(16) | 2580(14) | 39 |
| H(14O) | -930(50) | 3999(19) | 3346(18) | 55 |

---

**Table 6.** Torsion angles [°] for compound **34**

|                     |             |
|---------------------|-------------|
| O(2)-B(1)-O(1)-C(1) | 15.59(17)   |
| O(3)-B(1)-O(1)-C(1) | 140.32(14)  |
| O(4)-B(1)-O(1)-C(1) | -104.16(16) |
| O(1)-B(1)-O(2)-C(2) | 7.35(17)    |
| O(3)-B(1)-O(2)-C(2) | -112.00(16) |
| O(4)-B(1)-O(2)-C(2) | 131.29(14)  |
| O(2)-B(1)-O(3)-C(3) | -106.85(16) |
| O(1)-B(1)-O(3)-C(3) | 136.05(14)  |
| O(4)-B(1)-O(3)-C(3) | 12.95(18)   |
| O(2)-B(1)-O(4)-C(4) | 136.89(14)  |
| O(1)-B(1)-O(4)-C(4) | -106.09(16) |
| O(3)-B(1)-O(4)-C(4) | 12.18(18)   |
| B(1)-O(1)-C(1)-C(5) | 89.43(16)   |
| B(1)-O(1)-C(1)-C(6) | -151.50(14) |
| B(1)-O(1)-C(1)-C(2) | -29.84(16)  |
| B(1)-O(2)-C(2)-C(7) | -146.22(15) |
| B(1)-O(2)-C(2)-C(8) | 94.02(16)   |
| B(1)-O(2)-C(2)-C(1) | -24.72(16)  |
| O(1)-C(1)-C(2)-O(2) | 32.72(15)   |



|                         |             |
|-------------------------|-------------|
| C(5)-C(1)-C(2)-O(2)     | -83.60(16)  |
| C(6)-C(1)-C(2)-O(2)     | 150.12(14)  |
| O(1)-C(1)-C(2)-C(7)     | 150.23(14)  |
| C(5)-C(1)-C(2)-C(7)     | 33.9(2)     |
| C(6)-C(1)-C(2)-C(7)     | -92.37(18)  |
| O(1)-C(1)-C(2)-C(8)     | -83.58(16)  |
| C(5)-C(1)-C(2)-C(8)     | 160.09(15)  |
| C(6)-C(1)-C(2)-C(8)     | 33.8(2)     |
| B(1)-O(3)-C(3)-C(10)    | -152.29(16) |
| B(1)-O(3)-C(3)-C(9)     | 87.90(16)   |
| B(1)-O(3)-C(3)-C(4)     | -30.67(17)  |
| B(1)-O(4)-C(4)-C(11)    | -151.54(15) |
| B(1)-O(4)-C(4)-C(12)    | 89.16(16)   |
| B(1)-O(4)-C(4)-C(3)     | -30.02(17)  |
| O(3)-C(3)-C(4)-O(4)     | 36.58(16)   |
| C(10)-C(3)-C(4)-O(4)    | 154.25(15)  |
| C(9)-C(3)-C(4)-O(4)     | -79.66(17)  |
| O(3)-C(3)-C(4)-C(11)    | 154.09(15)  |
| C(10)-C(3)-C(4)-C(11)   | -88.24(19)  |
| C(9)-C(3)-C(4)-C(11)    | 37.8(2)     |
| O(3)-C(3)-C(4)-C(12)    | -79.15(17)  |
| C(10)-C(3)-C(4)-C(12)   | 38.5(2)     |
| C(9)-C(3)-C(4)-C(12)    | 164.61(15)  |
| N(2)-C(13)-C(14)-C(15)  | 53.78(19)   |
| C(13)-C(14)-C(15)-N(1)  | -47.1(2)    |
| C(14)-C(15)-N(1)-C(22)  | 17.7(2)     |
| C(14)-C(15)-N(1)-C(17)  | -165.58(15) |
| C(22)-N(1)-C(17)-C(18)  | -75.0(2)    |
| C(15)-N(1)-C(17)-C(18)  | 108.30(19)  |
| N(1)-C(17)-C(18)-C(19)  | 77.7(2)     |
| C(17)-C(18)-C(19)-C(20) | -56.4(2)    |
| C(18)-C(19)-C(20)-C(21) | 60.6(2)     |
| C(19)-C(20)-C(21)-C(22) | -80.8(2)    |
| C(15)-N(1)-C(22)-N(2)   | 5.9(3)      |

|                         |             |
|-------------------------|-------------|
| C(17)-N(1)-C(22)-N(2)   | -170.61(16) |
| C(15)-N(1)-C(22)-C(21)  | -172.35(16) |
| C(17)-N(1)-C(22)-C(21)  | 11.1(2)     |
| C(20)-C(21)-C(22)-N(2)  | -118.59(17) |
| C(20)-C(21)-C(22)-N(1)  | 59.8(2)     |
| N(1)-C(22)-N(2)-C(13)   | 2.9(3)      |
| C(21)-C(22)-N(2)-C(13)  | -178.77(15) |
| C(14)-C(13)-N(2)-C(22)  | -33.6(2)    |
| O(9)-B(3)-O(8)-C(24)    | -10.14(17)  |
| O(11)-B(3)-O(8)-C(24)   | 110.04(17)  |
| O(10)-B(3)-O(8)-C(24)   | -132.90(15) |
| O(8)-B(3)-O(9)-C(25)    | -12.88(17)  |
| O(11)-B(3)-O(9)-C(25)   | -138.42(14) |
| O(10)-B(3)-O(9)-C(25)   | 106.41(16)  |
| O(8)-B(3)-O(10)-C(26)   | -137.58(15) |
| O(9)-B(3)-O(10)-C(26)   | 105.86(16)  |
| O(11)-B(3)-O(10)-C(26)  | -12.32(19)  |
| O(8)-B(3)-O(11)-C(27)   | 103.9(3)    |
| O(9)-B(3)-O(11)-C(27)   | -138.2(3)   |
| O(10)-B(3)-O(11)-C(27)  | -16.2(3)    |
| B(3)-O(8)-C(24)-C(29)   | 149.11(16)  |
| B(3)-O(8)-C(24)-C(28)   | -91.73(17)  |
| B(3)-O(8)-C(24)-C(25)   | 26.89(17)   |
| B(3)-O(9)-C(25)-C(31)   | -90.52(17)  |
| B(3)-O(9)-C(25)-C(30)   | 150.55(15)  |
| B(3)-O(9)-C(25)-C(24)   | 28.58(17)   |
| O(8)-C(24)-C(25)-O(9)   | -33.35(17)  |
| C(29)-C(24)-C(25)-O(9)  | -151.05(16) |
| C(28)-C(24)-C(25)-O(9)  | 82.90(17)   |
| O(8)-C(24)-C(25)-C(31)  | 82.76(17)   |
| C(29)-C(24)-C(25)-C(31) | -34.9(2)    |
| C(28)-C(24)-C(25)-C(31) | -160.99(16) |
| O(8)-C(24)-C(25)-C(30)  | -151.01(14) |
| C(29)-C(24)-C(25)-C(30) | 91.3(2)     |

|                         |             |
|-------------------------|-------------|
| C(28)-C(24)-C(25)-C(30) | -34.8(2)    |
| B(3)-O(10)-C(26)-C(32)  | -88.56(18)  |
| B(3)-O(10)-C(26)-C(33)  | 152.34(16)  |
| B(3)-O(10)-C(26)-C(27)  | 33.4(3)     |
| B(3)-O(11)-C(27)-C(34)  | 156.4(3)    |
| B(3)-O(11)-C(27)-C(35)  | -84.3(3)    |
| B(3)-O(11)-C(27)-C(26)  | 36.4(4)     |
| O(10)-C(26)-C(27)-O(11) | -42.1(4)    |
| C(32)-C(26)-C(27)-O(11) | 74.0(4)     |
| C(33)-C(26)-C(27)-O(11) | -158.1(3)   |
| O(10)-C(26)-C(27)-C(34) | -157.9(3)   |
| C(32)-C(26)-C(27)-C(34) | -41.8(4)    |
| C(33)-C(26)-C(27)-C(34) | 86.1(4)     |
| O(10)-C(26)-C(27)-C(35) | 76.2(3)     |
| C(32)-C(26)-C(27)-C(35) | -167.7(2)   |
| C(33)-C(26)-C(27)-C(35) | -39.8(3)    |
| N(4)-C(36)-C(37)-C(38)  | 50.5(2)     |
| C(36)-C(37)-C(38)-N(3)  | -51.7(2)    |
| C(37)-C(38)-N(3)-C(45)  | 26.5(2)     |
| C(37)-C(38)-N(3)-C(40)  | -156.50(16) |
| C(45)-N(3)-C(40)-C(41)  | 65.2(2)     |
| C(38)-N(3)-C(40)-C(41)  | -111.72(18) |
| N(3)-C(40)-C(41)-C(42)  | -80.0(2)    |
| C(40)-C(41)-C(42)-C(43) | 60.4(2)     |
| C(41)-C(42)-C(43)-C(44) | -60.0(2)    |
| C(42)-C(43)-C(44)-C(45) | 80.6(2)     |
| C(38)-N(3)-C(45)-N(4)   | 0.9(3)      |
| C(40)-N(3)-C(45)-N(4)   | -175.93(16) |
| C(38)-N(3)-C(45)-C(44)  | 179.53(16)  |
| C(40)-N(3)-C(45)-C(44)  | 2.7(3)      |
| C(43)-C(44)-C(45)-N(4)  | 109.26(18)  |
| C(43)-C(44)-C(45)-N(3)  | -69.5(2)    |
| N(3)-C(45)-N(4)-C(36)   | -1.2(3)     |
| C(44)-C(45)-N(4)-C(36)  | -179.88(17) |

C(37)-C(36)-N(4)-C(45) -25.7(3)

Symmetry transformations used to generate equivalent atoms:

**Table 7.** Hydrogen bonds for compound **34** [ $\text{\AA}$  and  $^\circ$ ].

| D-H...A               | d(D-H)  | d(H...A) | d(D...A)   | $\angle(\text{DHA})$ |
|-----------------------|---------|----------|------------|----------------------|
| N(2)-H(2N)...O(4)#1   | 0.90(3) | 1.81(3)  | 2.7076(19) | 175(2)               |
| O(5)-H(5O)...O(1)#2   | 0.81(3) | 1.85(3)  | 2.6523(18) | 172(3)               |
| O(6)-H(6O)...O(3)#2   | 0.83(3) | 1.96(3)  | 2.7743(18) | 167(3)               |
| O(7)-H(7O)...O(2)     | 0.80(3) | 1.98(3)  | 2.7811(19) | 177(3)               |
| N(4)-H(4N)...O(10)    | 0.84(3) | 1.85(3)  | 2.6909(19) | 176(3)               |
| O(12)-H(12O)...O(11)  | 0.91(4) | 1.89(4)  | 2.780(2)   | 169(3)               |
| O(13)-H(13O)...O(9)   | 0.91(3) | 1.72(3)  | 2.6272(17) | 175(3)               |
| O(14)-H(14O)...O(8)#3 | 0.82(4) | 2.01(4)  | 2.825(2)   | 177(3)               |

Symmetry transformations used to generate equivalent atoms:

#1  $x, -y+2, z+1/2$  #2  $x+1, y, z$  #3  $x-1, y, z$ 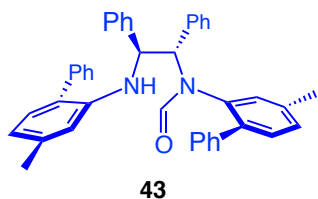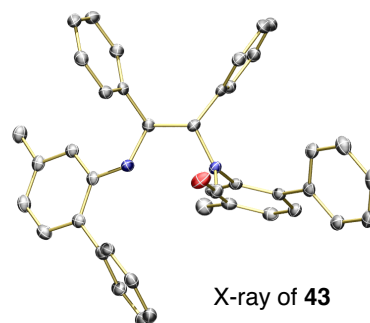**Table 1.** Crystal data and structure refinement for compound **43**

|                     |                      |
|---------------------|----------------------|
| Identification code | C41H36N2O            |
| Empirical formula   | C41 H36 N2 O         |
| Formula weight      | 572.72               |
| Temperature         | 100(2) K             |
| Wavelength          | 1.54178 $\text{\AA}$ |
| Crystal system      | Trigonal             |

|                                   |                                             |           |
|-----------------------------------|---------------------------------------------|-----------|
| Space group                       | P 3(2)                                      |           |
| Unit cell dimensions              | a = 9.7301(5) Å                             | a = 90°.  |
|                                   | b = 9.7301(5) Å                             | b = 90°.  |
|                                   | c = 28.7268(16) Å                           | g = 120°. |
| Volume                            | 2355.3(2) Å <sup>3</sup>                    |           |
| Z                                 | 3                                           |           |
| Density (calculated)              | 1.211 Mg/m <sup>3</sup>                     |           |
| Absorption coefficient            | 0.555 mm <sup>-1</sup>                      |           |
| F(000)                            | 912                                         |           |
| Crystal size                      | 0.20 x 0.15 x 0.10 mm <sup>3</sup>          |           |
| Theta range for data collection   | 5.25 to 68.04°.                             |           |
| Index ranges                      | -11<=h<=11, -11<=k<=11, -33<=l<=34          |           |
| Reflections collected             | 21349                                       |           |
| Independent reflections           | 5490 [R(int) = 0.0216]                      |           |
| Completeness to theta = 67.00°    | 98.8 %                                      |           |
| Absorption correction             | Semi-empirical from equivalents             |           |
| Max. and min. transmission        | 0.9466 and 0.8971                           |           |
| Refinement method                 | Full-matrix least-squares on F <sup>2</sup> |           |
| Data / restraints / parameters    | 5490 / 4 / 408                              |           |
| Goodness-of-fit on F <sup>2</sup> | 1.047                                       |           |
| Final R indices [I>2sigma(I)]     | R1 = 0.0268, wR2 = 0.0681                   |           |
| R indices (all data)              | R1 = 0.0269, wR2 = 0.0682                   |           |
| Absolute structure parameter      | 0.05(17)                                    |           |
| Extinction coefficient            | na                                          |           |
| Largest diff. peak and hole       | 0.140 and -0.174 e. Å <sup>-3</sup>         |           |

**Table 2.** Atomic coordinates ( $\times 10^4$ ) and equivalent isotropic displacement parameters ( $\text{\AA}^2 \times 10^3$ ) for compound **43**. U(eq) is defined as one third of the trace of the orthogonalized  $U^{ij}$  tensor

|      | x       | y        | z       | U(eq) |
|------|---------|----------|---------|-------|
| O(1) | 220(1)  | 9992(1)  | 3214(1) | 30(1) |
| N(1) | 2603(1) | 10281(1) | 2986(1) | 17(1) |

|       |          |          |         |       |
|-------|----------|----------|---------|-------|
| N(2)  | 880(1)   | 7601(1)  | 2441(1) | 19(1) |
| C(1)  | 2320(1)  | 10524(1) | 2493(1) | 17(1) |
| C(2)  | 1805(1)  | 9041(1)  | 2176(1) | 18(1) |
| C(3)  | 3683(1)  | 12007(1) | 2278(1) | 18(1) |
| C(4)  | 3479(2)  | 13305(2) | 2192(1) | 24(1) |
| C(5)  | 4679(2)  | 14675(2) | 1989(1) | 29(1) |
| C(6)  | 6106(2)  | 14774(2) | 1872(1) | 30(1) |
| C(7)  | 6334(2)  | 13506(2) | 1960(1) | 26(1) |
| C(8)  | 5131(1)  | 12127(2) | 2160(1) | 21(1) |
| C(9)  | 4047(1)  | 10369(1) | 3143(1) | 18(1) |
| C(10) | 4470(1)  | 9306(1)  | 2959(1) | 20(1) |
| C(11) | 5865(2)  | 9344(1)  | 3086(1) | 23(1) |
| C(12) | 6808(2)  | 10434(2) | 3425(1) | 25(1) |
| C(13) | 6371(1)  | 11458(2) | 3620(1) | 23(1) |
| C(14) | 5002(1)  | 11481(1) | 3481(1) | 20(1) |
| C(15) | 4658(1)  | 12664(1) | 3701(1) | 20(1) |
| C(16) | 4289(1)  | 13646(2) | 3438(1) | 23(1) |
| C(17) | 4063(2)  | 14794(2) | 3651(1) | 28(1) |
| C(18) | 4187(2)  | 14988(2) | 4130(1) | 30(1) |
| C(19) | 4553(2)  | 14023(2) | 4395(1) | 28(1) |
| C(20) | 4790(1)  | 12879(2) | 4183(1) | 24(1) |
| C(21) | 6356(2)  | 8262(2)  | 2858(1) | 32(1) |
| C(22) | 1465(1)  | 10033(1) | 3303(1) | 21(1) |
| C(23) | 572(1)   | 6121(1)  | 2287(1) | 18(1) |
| C(24) | 939(1)   | 5881(1)  | 1836(1) | 20(1) |
| C(25) | 641(1)   | 4394(2)  | 1682(1) | 22(1) |
| C(26) | -74(2)   | 3116(2)  | 1985(1) | 25(1) |
| C(27) | -423(2)  | 3342(2)  | 2440(1) | 24(1) |
| C(28) | -110(1)  | 4814(1)  | 2601(1) | 20(1) |
| C(29) | -420(1)  | 5040(1)  | 3094(1) | 20(1) |
| C(30) | -1430(1) | 5617(1)  | 3213(1) | 21(1) |
| C(31) | -1667(2) | 5856(1)  | 3675(1) | 24(1) |
| C(32) | -898(2)  | 5528(2)  | 4028(1) | 27(1) |
| C(33) | 82(2)    | 4925(2)  | 3915(1) | 28(1) |
| C(34) | 315(2)   | 4670(2)  | 3454(1) | 25(1) |
| C(35) | 1158(2)  | 4212(2)  | 1202(1) | 28(1) |

|       |          |         |         |       |
|-------|----------|---------|---------|-------|
| C(36) | 852(1)   | 9161(1) | 1773(1) | 18(1) |
| C(37) | 1492(1)  | 9629(1) | 1329(1) | 21(1) |
| C(38) | 575(2)   | 9699(2) | 967(1)  | 24(1) |
| C(39) | -974(2)  | 9331(1) | 1047(1) | 24(1) |
| C(40) | -1612(1) | 8896(1) | 1491(1) | 23(1) |
| C(41) | -705(1)  | 8808(1) | 1850(1) | 20(1) |

---

**Table 3.** Bond lengths [Å] and angles [°] for compound **43**

|             |            |
|-------------|------------|
| O(1)-C(22)  | 1.2184(15) |
| N(1)-C(22)  | 1.3595(15) |
| N(1)-C(9)   | 1.4366(15) |
| N(1)-C(1)   | 1.4829(14) |
| N(2)-C(23)  | 1.3875(15) |
| N(2)-C(2)   | 1.4463(15) |
| N(2)-H(2N)  | 0.875(13)  |
| C(1)-C(3)   | 1.5192(16) |
| C(1)-C(2)   | 1.5626(15) |
| C(1)-H(1)   | 0.986(12)  |
| C(2)-C(36)  | 1.5239(16) |
| C(2)-H(2)   | 0.994(12)  |
| C(3)-C(4)   | 1.3951(17) |
| C(3)-C(8)   | 1.3972(17) |
| C(4)-C(5)   | 1.3868(19) |
| C(4)-H(4)   | 0.9500     |
| C(5)-C(6)   | 1.384(2)   |
| C(5)-H(5)   | 0.9500     |
| C(6)-C(7)   | 1.382(2)   |
| C(6)-H(6)   | 0.9500     |
| C(7)-C(8)   | 1.3885(18) |
| C(7)-H(7)   | 0.9500     |
| C(8)-H(8)   | 0.9500     |
| C(9)-C(10)  | 1.3937(17) |
| C(9)-C(14)  | 1.4049(17) |
| C(10)-C(11) | 1.3889(18) |

|              |            |
|--------------|------------|
| C(10)-H(10)  | 0.9500     |
| C(11)-C(12)  | 1.3942(19) |
| C(11)-C(21)  | 1.5071(18) |
| C(12)-C(13)  | 1.3820(19) |
| C(12)-H(12)  | 0.9500     |
| C(13)-C(14)  | 1.4008(17) |
| C(13)-H(13)  | 0.9500     |
| C(14)-C(15)  | 1.4910(17) |
| C(15)-C(20)  | 1.3955(17) |
| C(15)-C(16)  | 1.3981(18) |
| C(16)-C(17)  | 1.3856(19) |
| C(16)-H(16)  | 0.9500     |
| C(17)-C(18)  | 1.384(2)   |
| C(17)-H(17)  | 0.9500     |
| C(18)-C(19)  | 1.387(2)   |
| C(18)-H(18)  | 0.9500     |
| C(19)-C(20)  | 1.3857(19) |
| C(19)-H(19)  | 0.9500     |
| C(20)-H(20A) | 0.9500     |
| C(21)-H(21A) | 0.9800     |
| C(21)-H(21B) | 0.9800     |
| C(21)-H(21C) | 0.9800     |
| C(22)-H(22)  | 0.9500     |
| C(23)-C(24)  | 1.3966(17) |
| C(23)-C(28)  | 1.4226(16) |
| C(24)-C(25)  | 1.3972(17) |
| C(24)-H(24)  | 0.9500     |
| C(25)-C(26)  | 1.3871(18) |
| C(25)-C(35)  | 1.5095(18) |
| C(26)-C(27)  | 1.3958(19) |
| C(26)-H(26)  | 0.9500     |
| C(27)-C(28)  | 1.3854(18) |
| C(27)-H(27)  | 0.9500     |
| C(28)-C(29)  | 1.4885(17) |
| C(29)-C(30)  | 1.3962(18) |
| C(29)-C(34)  | 1.4009(18) |



|                  |            |
|------------------|------------|
| C(30)-C(31)      | 1.3878(18) |
| C(30)-H(30)      | 0.9500     |
| C(31)-C(32)      | 1.3879(19) |
| C(31)-H(31)      | 0.9500     |
| C(32)-C(33)      | 1.385(2)   |
| C(32)-H(32)      | 0.9500     |
| C(33)-C(34)      | 1.3873(19) |
| C(33)-H(33)      | 0.9500     |
| C(34)-H(34)      | 0.9500     |
| C(35)-H(35A)     | 0.9800     |
| C(35)-H(35B)     | 0.9800     |
| C(35)-H(35C)     | 0.9800     |
| C(36)-C(37)      | 1.3927(17) |
| C(36)-C(41)      | 1.3931(16) |
| C(37)-C(38)      | 1.3922(17) |
| C(37)-H(37)      | 0.9500     |
| C(38)-C(39)      | 1.3822(19) |
| C(38)-H(38)      | 0.9500     |
| C(39)-C(40)      | 1.3880(18) |
| C(39)-H(39)      | 0.9500     |
| C(40)-C(41)      | 1.3879(17) |
| C(40)-H(40)      | 0.9500     |
| C(41)-H(41)      | 0.9500     |
|                  |            |
| C(22)-N(1)-C(9)  | 119.07(9)  |
| C(22)-N(1)-C(1)  | 117.86(9)  |
| C(9)-N(1)-C(1)   | 123.00(9)  |
| C(23)-N(2)-C(2)  | 123.06(10) |
| C(23)-N(2)-H(2N) | 117.0(10)  |
| C(2)-N(2)-H(2N)  | 117.3(10)  |
| N(1)-C(1)-C(3)   | 113.32(9)  |
| N(1)-C(1)-C(2)   | 114.12(9)  |
| C(3)-C(1)-C(2)   | 111.35(9)  |
| N(1)-C(1)-H(1)   | 102.9(8)   |
| C(3)-C(1)-H(1)   | 108.3(8)   |
| C(2)-C(1)-H(1)   | 106.0(8)   |

|                   |            |
|-------------------|------------|
| N(2)-C(2)-C(36)   | 111.48(9)  |
| N(2)-C(2)-C(1)    | 110.15(9)  |
| C(36)-C(2)-C(1)   | 107.43(9)  |
| N(2)-C(2)-H(2)    | 111.7(9)   |
| C(36)-C(2)-H(2)   | 107.7(8)   |
| C(1)-C(2)-H(2)    | 108.1(9)   |
| C(4)-C(3)-C(8)    | 118.39(11) |
| C(4)-C(3)-C(1)    | 118.69(11) |
| C(8)-C(3)-C(1)    | 122.93(11) |
| C(5)-C(4)-C(3)    | 120.78(12) |
| C(5)-C(4)-H(4)    | 119.6      |
| C(3)-C(4)-H(4)    | 119.6      |
| C(6)-C(5)-C(4)    | 120.20(12) |
| C(6)-C(5)-H(5)    | 119.9      |
| C(4)-C(5)-H(5)    | 119.9      |
| C(7)-C(6)-C(5)    | 119.74(12) |
| C(7)-C(6)-H(6)    | 120.1      |
| C(5)-C(6)-H(6)    | 120.1      |
| C(6)-C(7)-C(8)    | 120.28(12) |
| C(6)-C(7)-H(7)    | 119.9      |
| C(8)-C(7)-H(7)    | 119.9      |
| C(7)-C(8)-C(3)    | 120.60(12) |
| C(7)-C(8)-H(8)    | 119.7      |
| C(3)-C(8)-H(8)    | 119.7      |
| C(10)-C(9)-C(14)  | 120.43(11) |
| C(10)-C(9)-N(1)   | 118.60(10) |
| C(14)-C(9)-N(1)   | 120.96(10) |
| C(11)-C(10)-C(9)  | 121.87(11) |
| C(11)-C(10)-H(10) | 119.1      |
| C(9)-C(10)-H(10)  | 119.1      |
| C(10)-C(11)-C(12) | 117.81(11) |
| C(10)-C(11)-C(21) | 120.96(12) |
| C(12)-C(11)-C(21) | 121.22(11) |
| C(13)-C(12)-C(11) | 120.60(11) |
| C(13)-C(12)-H(12) | 119.7      |
| C(11)-C(12)-H(12) | 119.7      |

|                     |            |
|---------------------|------------|
| C(12)-C(13)-C(14)   | 122.24(11) |
| C(12)-C(13)-H(13)   | 118.9      |
| C(14)-C(13)-H(13)   | 118.9      |
| C(13)-C(14)-C(9)    | 116.95(11) |
| C(13)-C(14)-C(15)   | 118.32(10) |
| C(9)-C(14)-C(15)    | 124.73(11) |
| C(20)-C(15)-C(16)   | 118.01(11) |
| C(20)-C(15)-C(14)   | 119.73(11) |
| C(16)-C(15)-C(14)   | 122.15(11) |
| C(17)-C(16)-C(15)   | 120.63(12) |
| C(17)-C(16)-H(16)   | 119.7      |
| C(15)-C(16)-H(16)   | 119.7      |
| C(18)-C(17)-C(16)   | 120.76(12) |
| C(18)-C(17)-H(17)   | 119.6      |
| C(16)-C(17)-H(17)   | 119.6      |
| C(17)-C(18)-C(19)   | 119.21(12) |
| C(17)-C(18)-H(18)   | 120.4      |
| C(19)-C(18)-H(18)   | 120.4      |
| C(20)-C(19)-C(18)   | 120.23(12) |
| C(20)-C(19)-H(19)   | 119.9      |
| C(18)-C(19)-H(19)   | 119.9      |
| C(19)-C(20)-C(15)   | 121.15(12) |
| C(19)-C(20)-H(20A)  | 119.4      |
| C(15)-C(20)-H(20A)  | 119.4      |
| C(11)-C(21)-H(21A)  | 109.5      |
| C(11)-C(21)-H(21B)  | 109.5      |
| H(21A)-C(21)-H(21B) | 109.5      |
| C(11)-C(21)-H(21C)  | 109.5      |
| H(21A)-C(21)-H(21C) | 109.5      |
| H(21B)-C(21)-H(21C) | 109.5      |
| O(1)-C(22)-N(1)     | 125.05(11) |
| O(1)-C(22)-H(22)    | 117.5      |
| N(1)-C(22)-H(22)    | 117.5      |
| N(2)-C(23)-C(24)    | 121.86(11) |
| N(2)-C(23)-C(28)    | 119.31(10) |
| C(24)-C(23)-C(28)   | 118.82(11) |

|                     |            |
|---------------------|------------|
| C(23)-C(24)-C(25)   | 121.90(11) |
| C(23)-C(24)-H(24)   | 119.1      |
| C(25)-C(24)-H(24)   | 119.1      |
| C(26)-C(25)-C(24)   | 118.81(11) |
| C(26)-C(25)-C(35)   | 121.04(11) |
| C(24)-C(25)-C(35)   | 120.10(11) |
| C(25)-C(26)-C(27)   | 119.96(11) |
| C(25)-C(26)-H(26)   | 120.0      |
| C(27)-C(26)-H(26)   | 120.0      |
| C(28)-C(27)-C(26)   | 121.92(12) |
| C(28)-C(27)-H(27)   | 119.0      |
| C(26)-C(27)-H(27)   | 119.0      |
| C(27)-C(28)-C(23)   | 118.54(11) |
| C(27)-C(28)-C(29)   | 120.85(11) |
| C(23)-C(28)-C(29)   | 120.56(11) |
| C(30)-C(29)-C(34)   | 118.40(11) |
| C(30)-C(29)-C(28)   | 121.81(11) |
| C(34)-C(29)-C(28)   | 119.79(11) |
| C(31)-C(30)-C(29)   | 120.68(11) |
| C(31)-C(30)-H(30)   | 119.7      |
| C(29)-C(30)-H(30)   | 119.7      |
| C(30)-C(31)-C(32)   | 120.39(12) |
| C(30)-C(31)-H(31)   | 119.8      |
| C(32)-C(31)-H(31)   | 119.8      |
| C(33)-C(32)-C(31)   | 119.44(12) |
| C(33)-C(32)-H(32)   | 120.3      |
| C(31)-C(32)-H(32)   | 120.3      |
| C(32)-C(33)-C(34)   | 120.51(12) |
| C(32)-C(33)-H(33)   | 119.7      |
| C(34)-C(33)-H(33)   | 119.7      |
| C(33)-C(34)-C(29)   | 120.54(12) |
| C(33)-C(34)-H(34)   | 119.7      |
| C(29)-C(34)-H(34)   | 119.7      |
| C(25)-C(35)-H(35A)  | 109.5      |
| C(25)-C(35)-H(35B)  | 109.5      |
| H(35A)-C(35)-H(35B) | 109.5      |

|                     |            |
|---------------------|------------|
| C(25)-C(35)-H(35C)  | 109.5      |
| H(35A)-C(35)-H(35C) | 109.5      |
| H(35B)-C(35)-H(35C) | 109.5      |
| C(37)-C(36)-C(41)   | 118.68(11) |
| C(37)-C(36)-C(2)    | 122.11(10) |
| C(41)-C(36)-C(2)    | 119.21(10) |
| C(38)-C(37)-C(36)   | 120.40(11) |
| C(38)-C(37)-H(37)   | 119.8      |
| C(36)-C(37)-H(37)   | 119.8      |
| C(39)-C(38)-C(37)   | 120.37(11) |
| C(39)-C(38)-H(38)   | 119.8      |
| C(37)-C(38)-H(38)   | 119.8      |
| C(38)-C(39)-C(40)   | 119.69(11) |
| C(38)-C(39)-H(39)   | 120.2      |
| C(40)-C(39)-H(39)   | 120.2      |
| C(41)-C(40)-C(39)   | 119.97(11) |
| C(41)-C(40)-H(40)   | 120.0      |
| C(39)-C(40)-H(40)   | 120.0      |
| C(40)-C(41)-C(36)   | 120.86(11) |
| C(40)-C(41)-H(41)   | 119.6      |
| C(36)-C(41)-H(41)   | 119.6      |

---

Symmetry transformations used to generate equivalent atoms:

**Table 4.** Anisotropic displacement parameters ( $\text{\AA}^2 \times 10^3$ ) for compound **43**. The anisotropic displacement factor exponent takes the form:  $-2p^2 [ h^2 a^* U_{11} + \dots + 2 h k a^* b^* U_{12} ]$

---

|      | U11   | U22   | U33   | U23   | U13   | U12   |
|------|-------|-------|-------|-------|-------|-------|
| O(1) | 22(1) | 48(1) | 21(1) | 1(1)  | 2(1)  | 18(1) |
| N(1) | 17(1) | 20(1) | 14(1) | -2(1) | 0(1)  | 8(1)  |
| N(2) | 22(1) | 19(1) | 14(1) | 0(1)  | 2(1)  | 9(1)  |
| C(1) | 17(1) | 21(1) | 13(1) | 0(1)  | -1(1) | 10(1) |
| C(2) | 16(1) | 19(1) | 18(1) | 0(1)  | 2(1)  | 8(1)  |

---

|       |       |       |       |        |       |       |
|-------|-------|-------|-------|--------|-------|-------|
| C(3)  | 22(1) | 20(1) | 12(1) | -3(1)  | -3(1) | 10(1) |
| C(4)  | 29(1) | 24(1) | 20(1) | -2(1)  | -4(1) | 15(1) |
| C(5)  | 42(1) | 19(1) | 25(1) | 0(1)   | -6(1) | 14(1) |
| C(6)  | 30(1) | 21(1) | 22(1) | 3(1)   | -3(1) | 1(1)  |
| C(7)  | 22(1) | 27(1) | 20(1) | 0(1)   | -1(1) | 6(1)  |
| C(8)  | 21(1) | 22(1) | 18(1) | 0(1)   | -1(1) | 9(1)  |
| C(9)  | 17(1) | 20(1) | 15(1) | 3(1)   | 2(1)  | 7(1)  |
| C(10) | 20(1) | 22(1) | 17(1) | 2(1)   | 0(1)  | 9(1)  |
| C(11) | 23(1) | 24(1) | 22(1) | 6(1)   | 4(1)  | 12(1) |
| C(12) | 20(1) | 28(1) | 27(1) | 5(1)   | -1(1) | 12(1) |
| C(13) | 20(1) | 25(1) | 21(1) | 1(1)   | -3(1) | 8(1)  |
| C(14) | 18(1) | 19(1) | 18(1) | 3(1)   | 1(1)  | 7(1)  |
| C(15) | 14(1) | 19(1) | 22(1) | -2(1)  | -1(1) | 4(1)  |
| C(16) | 20(1) | 24(1) | 23(1) | -2(1)  | -5(1) | 8(1)  |
| C(17) | 21(1) | 24(1) | 39(1) | -2(1)  | -4(1) | 11(1) |
| C(18) | 20(1) | 27(1) | 39(1) | -13(1) | -2(1) | 10(1) |
| C(19) | 23(1) | 31(1) | 23(1) | -8(1)  | -1(1) | 8(1)  |
| C(20) | 19(1) | 24(1) | 23(1) | -1(1)  | -2(1) | 6(1)  |
| C(21) | 30(1) | 34(1) | 38(1) | -1(1)  | 2(1)  | 21(1) |
| C(22) | 19(1) | 24(1) | 16(1) | -2(1)  | -1(1) | 8(1)  |
| C(23) | 14(1) | 20(1) | 21(1) | -2(1)  | -3(1) | 9(1)  |
| C(24) | 17(1) | 22(1) | 21(1) | 0(1)   | -1(1) | 9(1)  |
| C(25) | 16(1) | 26(1) | 25(1) | -5(1)  | -4(1) | 12(1) |
| C(26) | 23(1) | 22(1) | 33(1) | -6(1)  | -3(1) | 12(1) |
| C(27) | 22(1) | 21(1) | 31(1) | 3(1)   | 1(1)  | 11(1) |
| C(28) | 15(1) | 21(1) | 22(1) | 0(1)   | -1(1) | 8(1)  |
| C(29) | 17(1) | 16(1) | 23(1) | 3(1)   | 1(1)  | 5(1)  |
| C(30) | 20(1) | 19(1) | 22(1) | 3(1)   | 0(1)  | 8(1)  |
| C(31) | 21(1) | 19(1) | 27(1) | 1(1)   | 4(1)  | 6(1)  |
| C(32) | 26(1) | 24(1) | 21(1) | -1(1)  | 1(1)  | 6(1)  |
| C(33) | 24(1) | 30(1) | 25(1) | 3(1)   | -6(1) | 9(1)  |
| C(34) | 21(1) | 25(1) | 28(1) | 3(1)   | -2(1) | 10(1) |
| C(35) | 27(1) | 31(1) | 28(1) | -8(1)  | -1(1) | 16(1) |
| C(36) | 20(1) | 14(1) | 18(1) | -2(1)  | -2(1) | 7(1)  |
| C(37) | 20(1) | 22(1) | 20(1) | 0(1)   | 2(1)  | 10(1) |
| C(38) | 29(1) | 24(1) | 16(1) | 2(1)   | 1(1)  | 12(1) |

|       |       |       |       |      |       |       |
|-------|-------|-------|-------|------|-------|-------|
| C(39) | 27(1) | 20(1) | 23(1) | 0(1) | -7(1) | 10(1) |
| C(40) | 20(1) | 19(1) | 27(1) | 0(1) | -2(1) | 9(1)  |
| C(41) | 21(1) | 19(1) | 18(1) | 1(1) | 1(1)  | 9(1)  |

**Table 5.** Hydrogen coordinates ( $\times 10^4$ ) and isotropic displacement parameters ( $\text{\AA}^2 \times 10^{-3}$ ) for compound **43**

|        | x        | y         | z       | U(eq) |
|--------|----------|-----------|---------|-------|
| H(2N)  | 763(18)  | 7701(18)  | 2738(5) | 23    |
| H(1)   | 1390(16) | 10672(16) | 2514(5) | 20    |
| H(2)   | 2779(16) | 9102(17)  | 2044(5) | 21    |
| H(4)   | 2506     | 13250     | 2273    | 28    |
| H(5)   | 4522     | 15547     | 1931    | 35    |
| H(6)   | 6926     | 15711     | 1732    | 36    |
| H(7)   | 7318     | 13578     | 1884    | 31    |
| H(8)   | 5295     | 11257     | 2216    | 25    |
| H(10)  | 3783     | 8534      | 2741    | 24    |
| H(12)  | 7760     | 10474     | 3523    | 30    |
| H(13)  | 7020     | 12169     | 3857    | 28    |
| H(16)  | 4193     | 13524     | 3109    | 28    |
| H(17)  | 3820     | 15456     | 3467    | 34    |
| H(18)  | 4023     | 15772     | 4274    | 35    |
| H(19)  | 4643     | 14147     | 4724    | 34    |
| H(20A) | 5046     | 12230     | 4368    | 29    |
| H(21A) | 5409     | 7254      | 2778    | 48    |
| H(21B) | 7020     | 8063      | 3073    | 48    |
| H(21C) | 6959     | 8764      | 2574    | 48    |
| H(22)  | 1654     | 9880      | 3618    | 25    |
| H(24)  | 1404     | 6754      | 1627    | 24    |
| H(26)  | -327     | 2087      | 1883    | 30    |
| H(27)  | -889     | 2460      | 2647    | 29    |
| H(30)  | -1961    | 5847      | 2974    | 25    |

|        |       |       |      |    |
|--------|-------|-------|------|----|
| H(31)  | -2360 | 6246  | 3751 | 29 |
| H(32)  | -1042 | 5716  | 4344 | 32 |
| H(33)  | 598   | 4683  | 4155 | 34 |
| H(34)  | 977   | 4242  | 3381 | 30 |
| H(35A) | 2309  | 4644  | 1199 | 42 |
| H(35B) | 879   | 4788  | 976  | 42 |
| H(35C) | 622   | 3085  | 1118 | 42 |
| H(37)  | 2561  | 9902  | 1272 | 25 |
| H(38)  | 1016  | 10003 | 664  | 28 |
| H(39)  | -1598 | 9374  | 800  | 29 |
| H(40)  | -2669 | 8660  | 1549 | 27 |
| H(41)  | -1151 | 8502  | 2152 | 24 |

---

**Table 6.** Torsion angles [°] for compound **43**

|                       |             |
|-----------------------|-------------|
| C(22)-N(1)-C(1)-C(3)  | 128.26(11)  |
| C(9)-N(1)-C(1)-C(3)   | -48.74(14)  |
| C(22)-N(1)-C(1)-C(2)  | -102.88(12) |
| C(9)-N(1)-C(1)-C(2)   | 80.12(13)   |
| C(23)-N(2)-C(2)-C(36) | 76.20(13)   |
| C(23)-N(2)-C(2)-C(1)  | -164.64(10) |
| N(1)-C(1)-C(2)-N(2)   | 32.55(13)   |
| C(3)-C(1)-C(2)-N(2)   | 162.40(9)   |
| N(1)-C(1)-C(2)-C(36)  | 154.15(9)   |
| C(3)-C(1)-C(2)-C(36)  | -76.00(11)  |
| N(1)-C(1)-C(3)-C(4)   | -107.76(12) |
| C(2)-C(1)-C(3)-C(4)   | 121.97(11)  |
| N(1)-C(1)-C(3)-C(8)   | 72.63(13)   |
| C(2)-C(1)-C(3)-C(8)   | -57.64(14)  |
| C(8)-C(3)-C(4)-C(5)   | 0.67(17)    |
| C(1)-C(3)-C(4)-C(5)   | -178.95(11) |
| C(3)-C(4)-C(5)-C(6)   | -0.43(19)   |
| C(4)-C(5)-C(6)-C(7)   | -0.35(19)   |
| C(5)-C(6)-C(7)-C(8)   | 0.87(19)    |
| C(6)-C(7)-C(8)-C(3)   | -0.61(18)   |



|                         |             |
|-------------------------|-------------|
| C(4)-C(3)-C(8)-C(7)     | -0.15(17)   |
| C(1)-C(3)-C(8)-C(7)     | 179.46(11)  |
| C(22)-N(1)-C(9)-C(10)   | 121.97(12)  |
| C(1)-N(1)-C(9)-C(10)    | -61.06(15)  |
| C(22)-N(1)-C(9)-C(14)   | -56.78(15)  |
| C(1)-N(1)-C(9)-C(14)    | 120.18(12)  |
| C(14)-C(9)-C(10)-C(11)  | -2.74(17)   |
| N(1)-C(9)-C(10)-C(11)   | 178.50(10)  |
| C(9)-C(10)-C(11)-C(12)  | 3.31(17)    |
| C(9)-C(10)-C(11)-C(21)  | -175.59(11) |
| C(10)-C(11)-C(12)-C(13) | -1.13(18)   |
| C(21)-C(11)-C(12)-C(13) | 177.76(12)  |
| C(11)-C(12)-C(13)-C(14) | -1.65(19)   |
| C(12)-C(13)-C(14)-C(9)  | 2.22(17)    |
| C(12)-C(13)-C(14)-C(15) | -177.98(11) |
| C(10)-C(9)-C(14)-C(13)  | -0.06(17)   |
| N(1)-C(9)-C(14)-C(13)   | 178.67(10)  |
| C(10)-C(9)-C(14)-C(15)  | -179.84(11) |
| N(1)-C(9)-C(14)-C(15)   | -1.10(18)   |
| C(13)-C(14)-C(15)-C(20) | -45.85(16)  |
| C(9)-C(14)-C(15)-C(20)  | 133.92(12)  |
| C(13)-C(14)-C(15)-C(16) | 130.40(12)  |
| C(9)-C(14)-C(15)-C(16)  | -49.82(17)  |
| C(20)-C(15)-C(16)-C(17) | -0.02(18)   |
| C(14)-C(15)-C(16)-C(17) | -176.34(11) |
| C(15)-C(16)-C(17)-C(18) | -0.42(19)   |
| C(16)-C(17)-C(18)-C(19) | 0.46(19)    |
| C(17)-C(18)-C(19)-C(20) | -0.07(19)   |
| C(18)-C(19)-C(20)-C(15) | -0.37(19)   |
| C(16)-C(15)-C(20)-C(19) | 0.42(18)    |
| C(14)-C(15)-C(20)-C(19) | 176.82(11)  |
| C(9)-N(1)-C(22)-O(1)    | 177.25(12)  |
| C(1)-N(1)-C(22)-O(1)    | 0.13(18)    |
| C(2)-N(2)-C(23)-C(24)   | -9.43(17)   |
| C(2)-N(2)-C(23)-C(28)   | 169.31(10)  |
| N(2)-C(23)-C(24)-C(25)  | 179.43(10)  |

|                         |             |
|-------------------------|-------------|
| C(28)-C(23)-C(24)-C(25) | 0.68(17)    |
| C(23)-C(24)-C(25)-C(26) | 1.56(17)    |
| C(23)-C(24)-C(25)-C(35) | -175.85(11) |
| C(24)-C(25)-C(26)-C(27) | -2.66(17)   |
| C(35)-C(25)-C(26)-C(27) | 174.73(12)  |
| C(25)-C(26)-C(27)-C(28) | 1.56(19)    |
| C(26)-C(27)-C(28)-C(23) | 0.71(18)    |
| C(26)-C(27)-C(28)-C(29) | -176.98(11) |
| N(2)-C(23)-C(28)-C(27)  | 179.42(11)  |
| C(24)-C(23)-C(28)-C(27) | -1.80(16)   |
| N(2)-C(23)-C(28)-C(29)  | -2.88(16)   |
| C(24)-C(23)-C(28)-C(29) | 175.90(11)  |
| C(27)-C(28)-C(29)-C(30) | -122.39(13) |
| C(23)-C(28)-C(29)-C(30) | 59.97(15)   |
| C(27)-C(28)-C(29)-C(34) | 57.64(16)   |
| C(23)-C(28)-C(29)-C(34) | -120.00(13) |
| C(34)-C(29)-C(30)-C(31) | 1.67(17)    |
| C(28)-C(29)-C(30)-C(31) | -178.30(11) |
| C(29)-C(30)-C(31)-C(32) | 0.15(18)    |
| C(30)-C(31)-C(32)-C(33) | -1.48(19)   |
| C(31)-C(32)-C(33)-C(34) | 1.0(2)      |
| C(32)-C(33)-C(34)-C(29) | 0.9(2)      |
| C(30)-C(29)-C(34)-C(33) | -2.19(18)   |
| C(28)-C(29)-C(34)-C(33) | 177.78(11)  |
| N(2)-C(2)-C(36)-C(37)   | -135.71(11) |
| C(1)-C(2)-C(36)-C(37)   | 103.52(12)  |
| N(2)-C(2)-C(36)-C(41)   | 44.98(14)   |
| C(1)-C(2)-C(36)-C(41)   | -75.79(12)  |
| C(41)-C(36)-C(37)-C(38) | -1.70(17)   |
| C(2)-C(36)-C(37)-C(38)  | 178.98(11)  |
| C(36)-C(37)-C(38)-C(39) | 1.08(18)    |
| C(37)-C(38)-C(39)-C(40) | 0.35(18)    |
| C(38)-C(39)-C(40)-C(41) | -1.11(18)   |
| C(39)-C(40)-C(41)-C(36) | 0.47(17)    |
| C(37)-C(36)-C(41)-C(40) | 0.94(17)    |
| C(2)-C(36)-C(41)-C(40)  | -179.73(11) |

---

Symmetry transformations used to generate equivalent atoms:

**Table 7.** Hydrogen bonds for compound **43** [Å and °]

---

| D-H...A           | d(D-H)    | d(H...A)  | d(D...A)   | <(DHA)    |
|-------------------|-----------|-----------|------------|-----------|
| N(2)-H(2N)...N(1) | 0.875(13) | 2.349(15) | 2.7729(14) | 110.0(12) |

---

Symmetry transformations used to generate equivalent atoms:

## ■ <sup>1</sup>H NMR Spectra

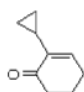

substrate for **12**

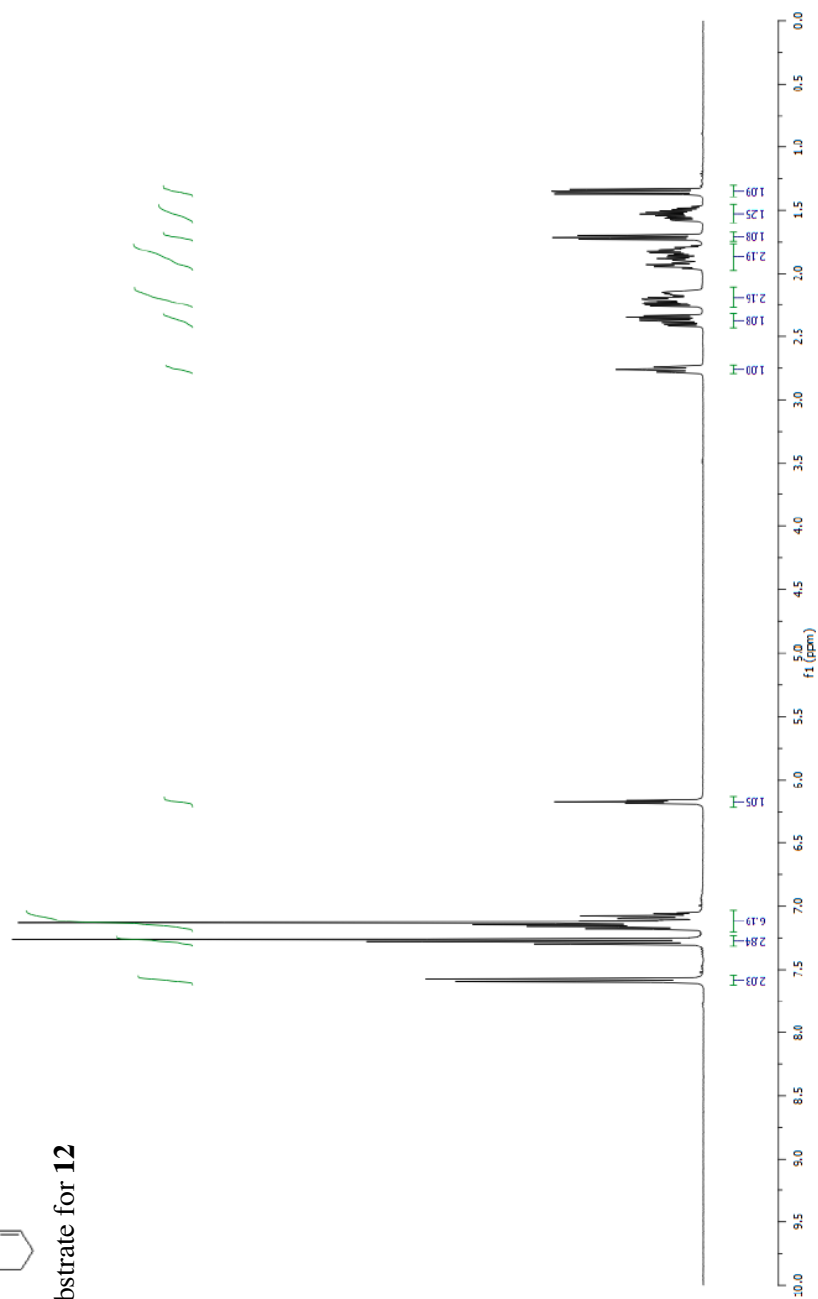

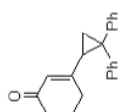

substrate for **13**

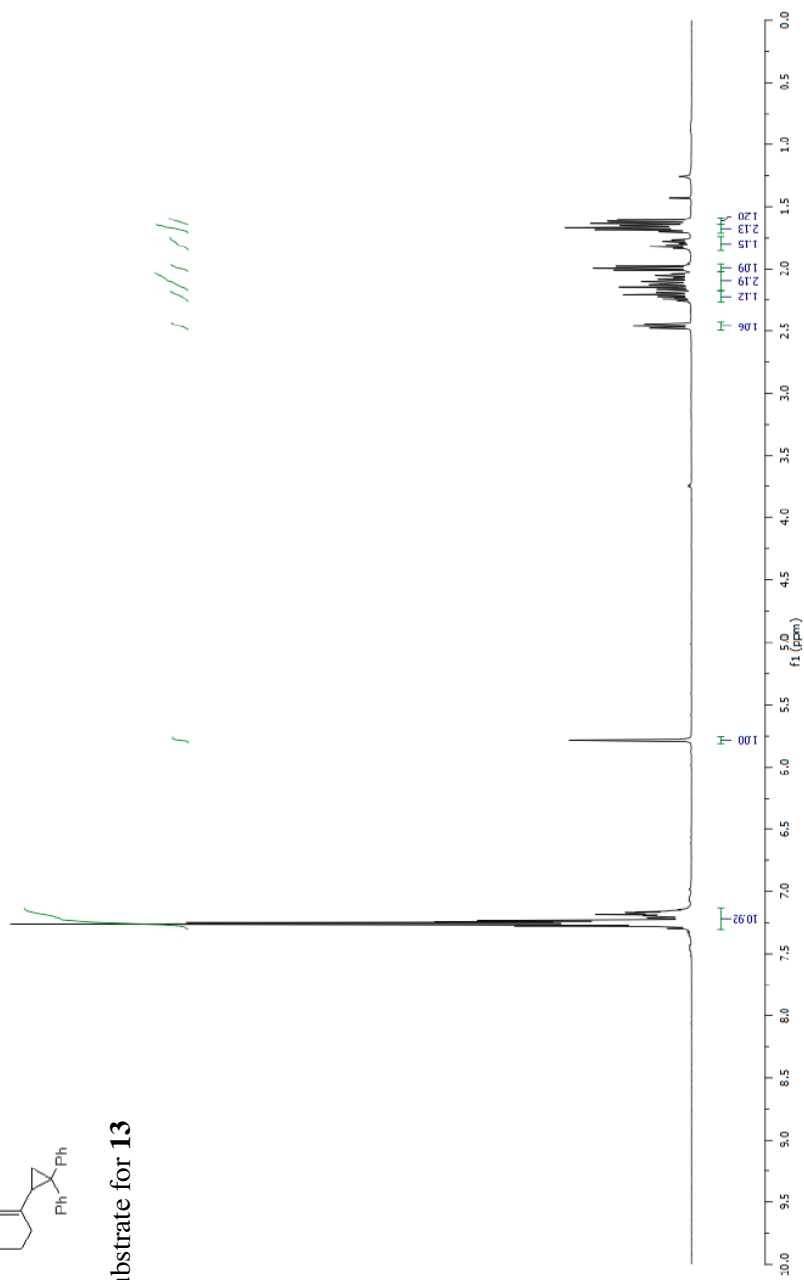

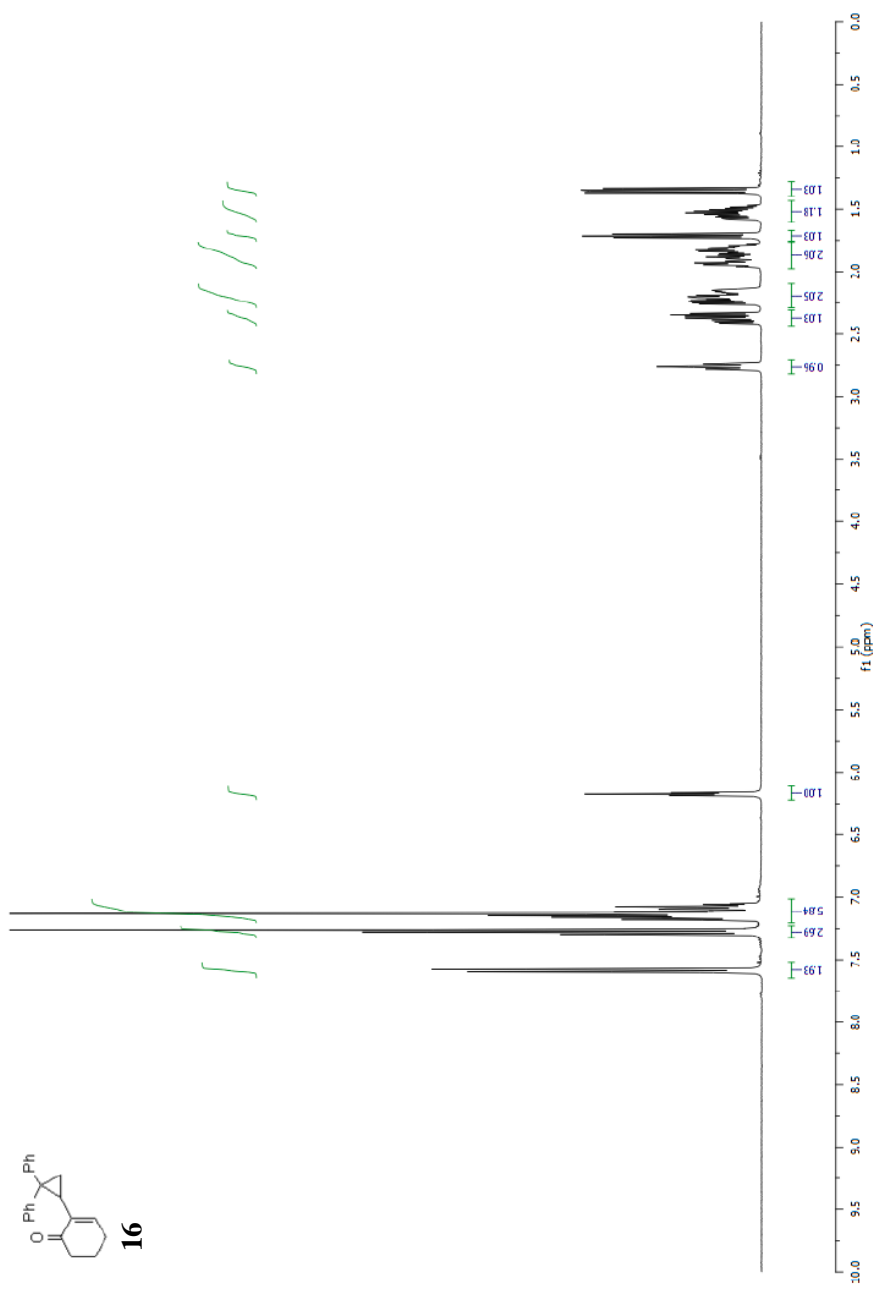

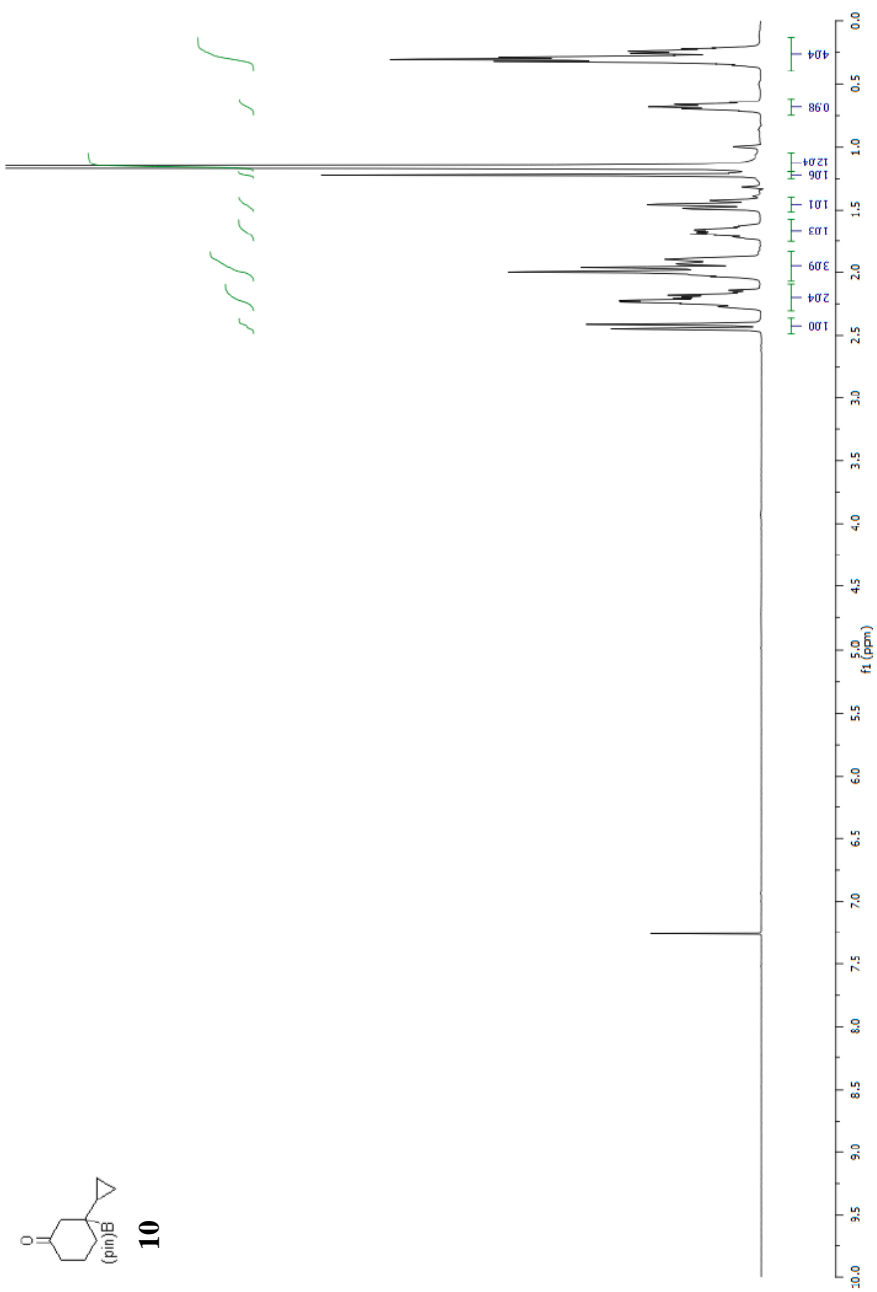

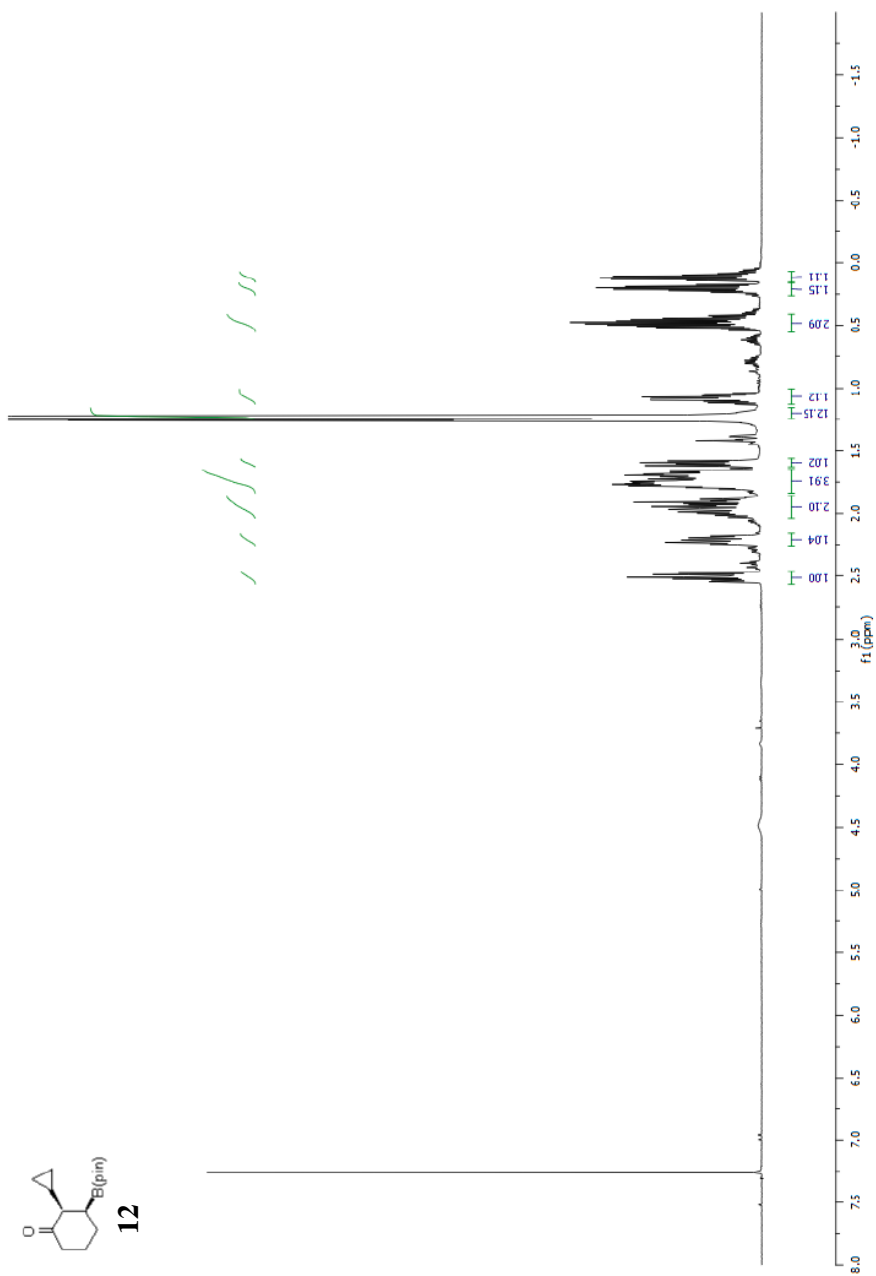



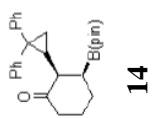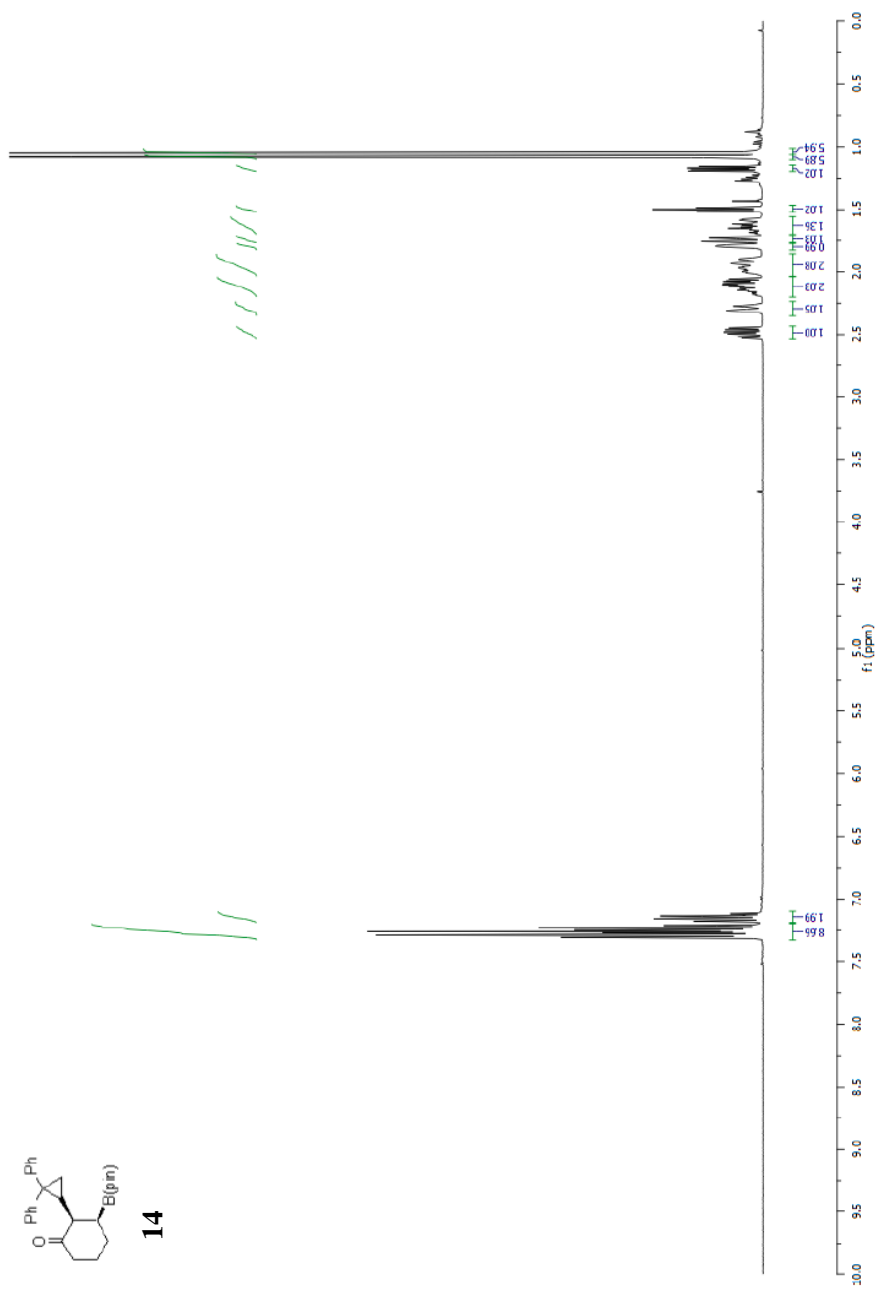

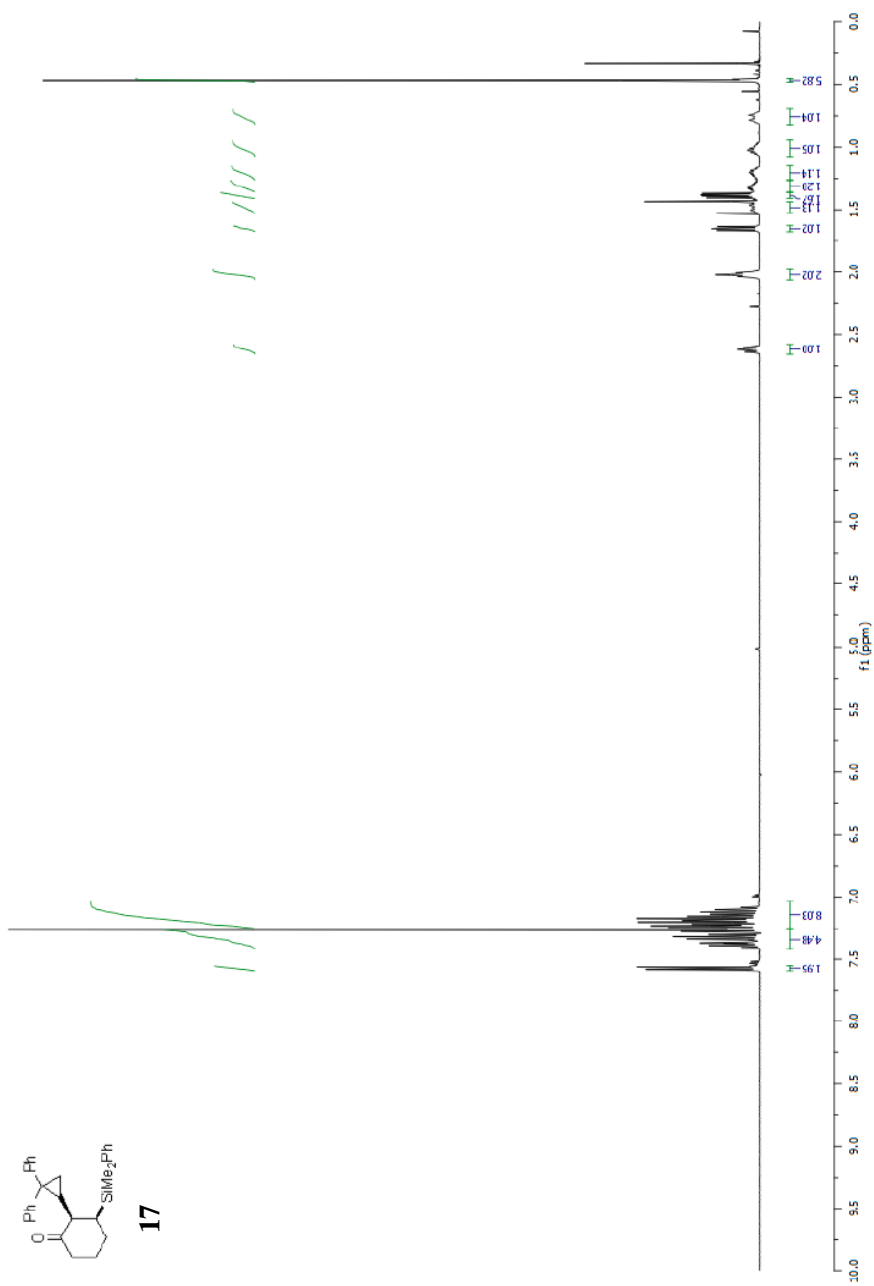

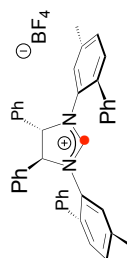

**7c** (<sup>13</sup>C-labeled)

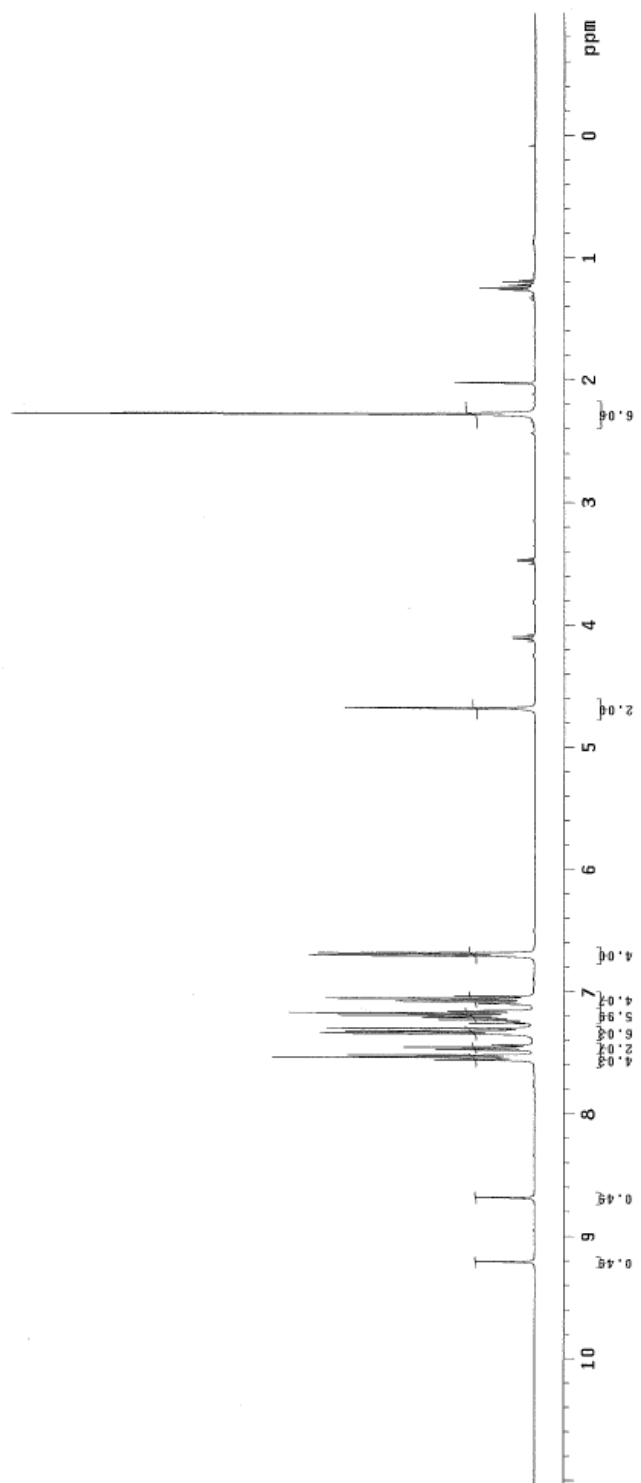

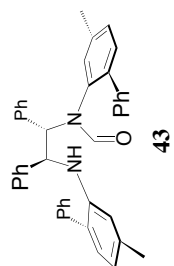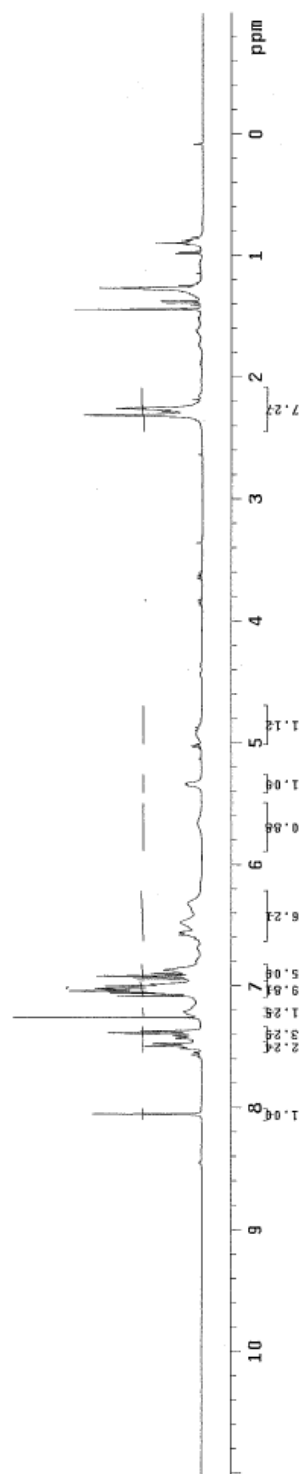

Reaction of  $B_2(\text{pin})_2$  with dbu and MeOH in thf after 90 min is shown below. Free pinacol was observed at  $\delta$  1.22 ppm.

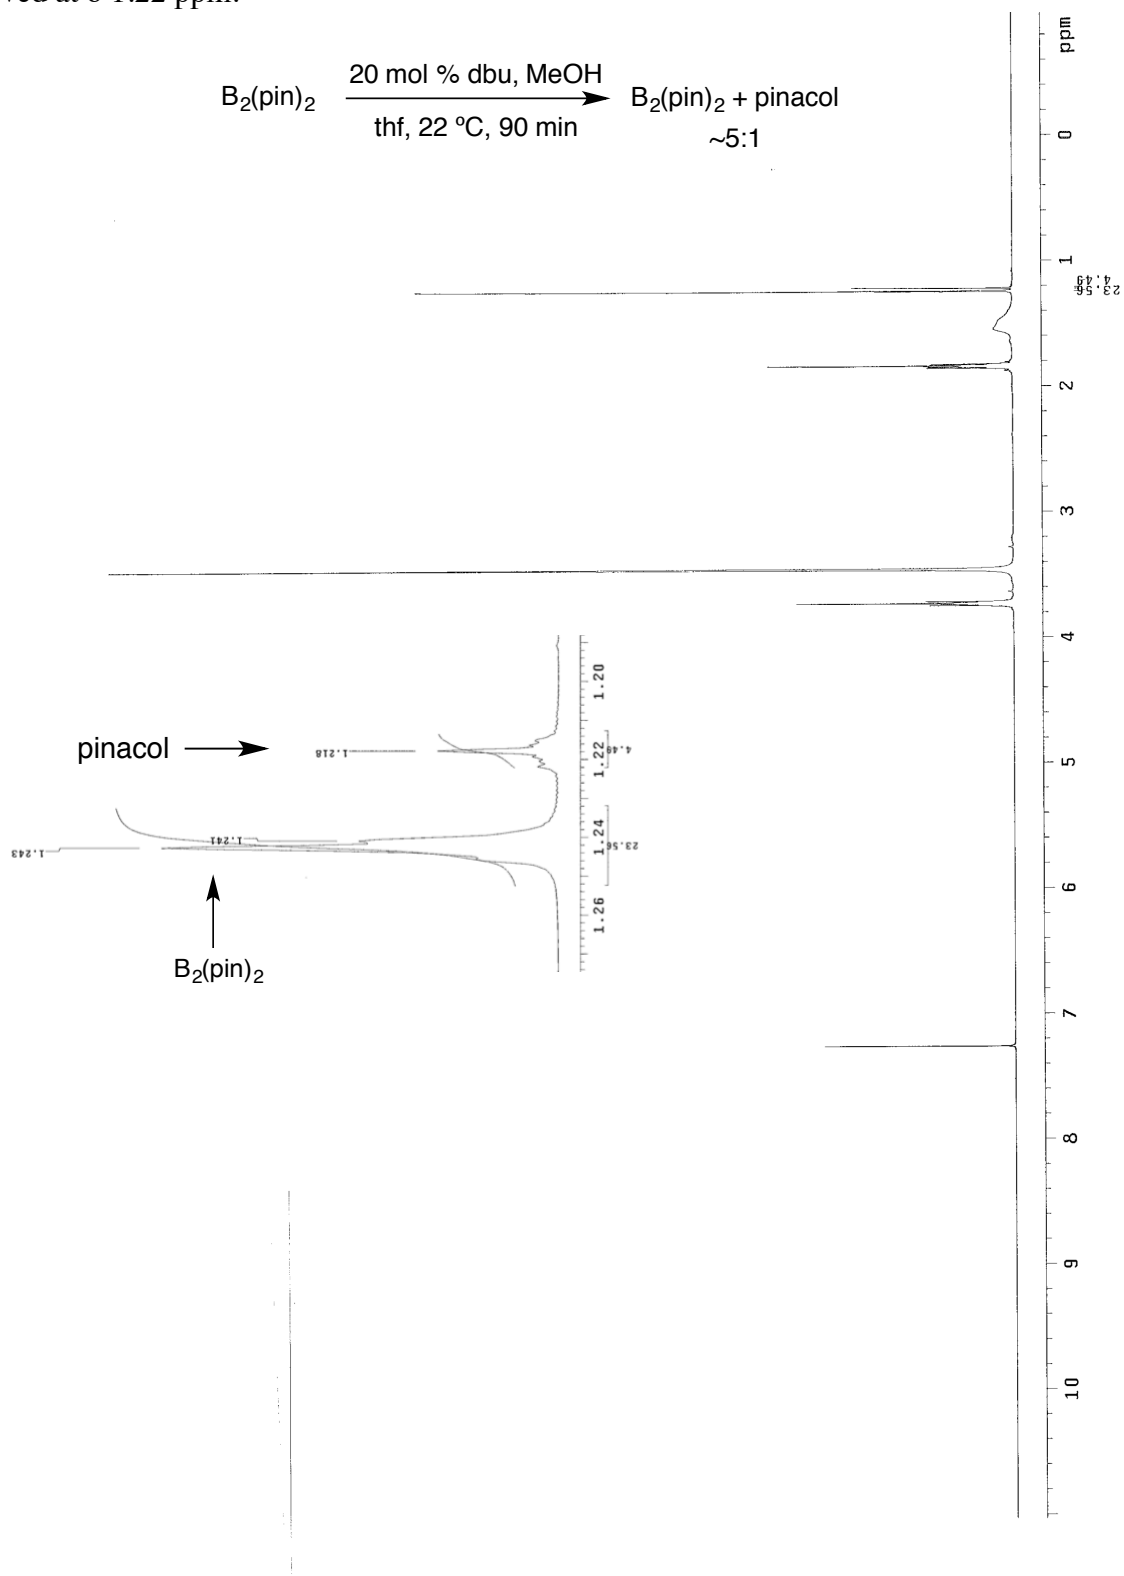

---

**References**

- (1) Piers, E.; Banville, J.; Lau, C. K.; Nagakura, I. *Can. J. Chem.* **1982**, *60*, 2965–2975.
- (2) (a) Lee, K.-s.; Zhugralin, A. R.; Hoveyda, A. H. *J. Am. Chem. Soc.* **2009**, *131*, 7253–7255. (b) Lee, K.-s.; Zhugralin, A. R.; Hoveyda, A. H. *J. Am. Chem. Soc.* **2010**, *132*, 12766. (c) O'Brien, J. M.; Hoveyda, A. H. *J. Am. Chem. Soc.* **2011**, *133*, 7712–7715. (d) Wu, H.; Radomkit, S.; O'Brien, J. M.; Hoveyda, A. H. *J. Am. Chem. Soc.* **2012**, *134*, 8277–8285. (e) Radomkit, S.; Hoveyda, A. H. *Angew. Chem., Int. Ed.* **2014**, *53*, 3387–3391.
- (3) Negishi, E.; Tan, Z.; Liou, S.-Y.; Liao, B. *Tetrahedron* **2000**, *56*, 10197–10207.
- (4) Pattenden, G.; Whybrow, D. *J. Chem. Soc. Perkin Trans. 1* **1981**, 3147–3149.
- (5) Majid, T. N.; Yeh, M. C. P.; Knochel, P. *Tetrahedron Lett.* **1989**, *30*, 5069–5072.
- (6) Lee, K.-s.; Hoveyda, A. H. *J. Org. Chem.* **2009**, *75*, 4455–4462.
- (7) Lee, K.-s.; Hoveyda, A. H. *J. Am. Chem. Soc.* **2010**, *132*, 2898–2900.
- (8) Meng, F.; Jang, H.; Hoveyda, A. H. *Chem. Eur. J.* **2013**, *19*, 3204–3214.
- (9) For a review on kinetic analysis of complex catalytic reactions, see: Blackmond, D. G. *Angew. Chem., Int. Ed.* **2005**, *44*, 4302–4320.
- (10) Pubill-Ulldemolins, C.; Bonet, A.; Gulyás, H.; Bo, C.; Fernández, E. *Org. Biomol. Chem.* **2012**, *10*, 9677–9682.
